# Supplementary material for: Proteomic Analysis Reveals Commonly Secreted Proteins of Mesenchymal Stem Cells Derived from Bone Marrow, Adipose Tissue, and Synovial Membrane to Show Potential for Cartilage Regeneration in Knee Osteoarthritis
Source: Hindawi journal article supplement (doi:10.1155/2021/6694299), 2021-06-28
Supplement: f2 [file 6694299.f2.pdf]

Supplementary Table 1-1: Detailed information on commonly secreted proteins by 3 bone marrow (BM) mesenchymal stem cells (MSCs) under normal condition.

| Accession  | Description                                                                                                                                                | Coverage [%] <sup>a</sup> | # Peptides <sup>b</sup> | # PSMs <sup>c</sup> | # Unique Peptides <sup>d</sup> | # AAs <sup>e</sup> | MW [kDa] | Calc. pI <sup>f</sup> | Score Sequest HT <sup>g</sup> | # Peptides: Sequest HT <sup>h</sup> |
|------------|------------------------------------------------------------------------------------------------------------------------------------------------------------|---------------------------|-------------------------|---------------------|--------------------------------|--------------------|----------|-----------------------|-------------------------------|-------------------------------------|
| A0A024QYT5 | Serpin peptidase inhibitor, clade E (Nexin, plasminogen activator inhibitor type 1), member 1, isoform CRA_b OS=Homo sapiens OX=9606 GN=SERPINE1 PE=3 SV=1 | 48                        | 13                      | 59                  | 13                             | 402                | 45       | 7.2                   | 161.94                        | 13                                  |
| A0A024QZL1 | Proteoglycan 1, secretory granule, isoform CRA_a OS=Homo sapiens OX=9606 GN=PRG1 PE=4 SV=1                                                                 | 8                         | 1                       | 2                   | 1                              | 158                | 17.6     | 4.86                  | 5.07                          | 1                                   |
| A0A024R0A1 | Macrophage colony-stimulating factor 1 OS=Homo sapiens OX=9606 GN=CSF1 PE=4 SV=1                                                                           | 2                         | 1                       | 3                   | 1                              | 554                | 60.1     | 5.29                  | 8.35                          | 1                                   |
| A0A024R0P8 | Transforming growth factor, beta 1 (Camurati-Engelmann disease), isoform CRA_a OS=Homo sapiens OX=9606 GN=TGFB1 PE=3 SV=1                                  | 5                         | 2                       | 6                   | 2                              | 390                | 44.3     | 8.53                  | 12.76                         | 2                                   |
| A0A024R1N1 | Myosin, heavy polypeptide 9, non-muscle, isoform CRA_a OS=Homo sapiens OX=9606 GN=MYH9 PE=3 SV=1                                                           | 22                        | 30                      | 72                  | 30                             | 1960               | 226.4    | 5.6                   | 186.22                        | 30                                  |
| A0A024R1U8 | Insulin-like growth factor binding protein 4, isoform CRA_a OS=Homo sapiens OX=9606 GN=IGFBP4 PE=4 SV=1                                                    | 21                        | 4                       | 19                  | 4                              | 258                | 27.9     | 7.15                  | 49.99                         | 4                                   |
| A0A024R1Z6 | Vesicle amine transport protein 1 homolog (T californica), isoform CRA_a OS=Homo sapiens OX=9606 GN=VAT1 PE=4 SV=1                                         | 18                        | 4                       | 7                   | 4                              | 393                | 41.9     | 6.29                  | 17.94                         | 4                                   |
| A0A024R222 | Phosphoserine aminotransferase OS=Homo sapiens OX=9606 GN=PSAT1 PE=3 SV=1                                                                                  | 12                        | 4                       | 6                   | 4                              | 370                | 40.4     | 7.66                  | 15.12                         | 4                                   |
| A0A024R2P0 | 40S ribosomal protein SA OS=Homo sapiens OX=9606 GN=RPSA PE=3 SV=1                                                                                         | 15                        | 3                       | 8                   | 3                              | 295                | 32.8     | 4.87                  | 21.41                         | 3                                   |
| A0A024R2W4 | Dystroglycan 1 (Dystrophin-associated glycoprotein 1), isoform CRA_a OS=Homo sapiens OX=9606 GN=DAG1 PE=4 SV=1                                             | 8                         | 4                       | 8                   | 4                              | 895                | 97.5     | 8.56                  | 21.96                         | 4                                   |
| A0A024R433 | Insulin-like growth factor binding protein 5, isoform CRA_a OS=Homo sapiens OX=9606 GN=IGFBP5 PE=4 SV=1                                                    | 36                        | 7                       | 47                  | 7                              | 272                | 30.6     | 8.21                  | 140.92                        | 7                                   |
| A0A024R462 | Fibronectin 1, isoform CRA_n OS=Homo sapiens OX=9606 GN=FN1 PE=4 SV=1                                                                                      | 57                        | 83                      | 1626                | 3                              | 2355               | 259      | 5.73                  | 5354.05                       | 83                                  |
| A0A024R5Z7 | Annexin OS=Homo sapiens OX=9606 GN=ANXA2 PE=3 SV=1                                                                                                         | 40                        | 12                      | 39                  | 12                             | 339                | 38.6     | 7.75                  | 99.1                          | 12                                  |
| A0A024R6K8 | Tryptophanyl-tRNA synthetase, isoform CRA_a OS=Homo sapiens OX=9606 GN=WARS PE=3 SV=1                                                                      | 7                         | 2                       | 2                   | 2                              | 471                | 53.1     | 6.23                  | 4.83                          | 2                                   |
| A0A024R6R4 | Matrix metalloproteinase 2 (Gelatinase A, 72kDa gelatinase, 72kDa type IV collagenase), isoform CRA_a OS=Homo sapiens OX=9606 GN=MMP2 PE=3 SV=1            | 54                        | 23                      | 180                 | 23                             | 660                | 73.8     | 5.47                  | 558.33                        | 23                                  |
| A0A024R8E5 | Collagen, type V, alpha 1, isoform CRA_a OS=Homo sapiens OX=9606 GN=COL5A1 PE=4 SV=1                                                                       | 19                        | 19                      | 63                  | 17                             | 1838               | 183.4    | 5.06                  | 209.65                        | 19                                  |
| A0A024R8V7 | TIMP metalloproteinase inhibitor 2, isoform CRA_b OS=Homo sapiens OX=9606 GN=TIMP2 PE=4 SV=1                                                               | 41                        | 6                       | 38                  | 6                              | 179                | 20.2     | 7.17                  | 106.35                        | 6                                   |
| A0A024R969 | Chitinase 3-like 1 (Cartilage glycoprotein-39), isoform CRA_a OS=Homo sapiens OX=9606 GN=CHI3L1 PE=3 SV=1                                                  | 33                        | 9                       | 24                  | 9                              | 383                | 42.6     | 8.46                  | 59.69                         | 9                                   |
| A0A024RA94 | Microfibrillar-associated protein 2, isoform CRA_d OS=Homo sapiens OX=9606 GN=MFAP2 PE=4 SV=1                                                              | 7                         | 1                       | 2                   | 1                              | 183                | 20.8     | 4.97                  | 4.39                          | 1                                   |
| A0A024RAK9 | Hyaluronan and proteoglycan link protein 1, isoform CRA_a OS=Homo sapiens OX=9606 GN=HAPLN1 PE=4 SV=1                                                      | 27                        | 6                       | 20                  | 4                              | 354                | 40.1     | 7.42                  | 62.6                          | 6                                   |
| A0A024RAM4 | Microtubule-associated protein 1B, isoform CRA_b OS=Homo sapiens OX=9606 GN=MAP1B PE=4 SV=1                                                                | 1                         | 1                       | 1                   | 1                              | 2468               | 270.5    | 4.81                  | 1.92                          | 1                                   |
| A0A024RAQ9 | Chondroitin sulfate proteoglycan 2 (Versican), isoform CRA_b OS=Homo sapiens OX=9606 GN=CSPG2 PE=4 SV=1                                                    | 7                         | 15                      | 56                  | 15                             | 3396               | 372.6    | 4.51                  | 165.93                        | 15                                  |
| A0A024RC55 | Milk fat globule-EGF factor 8 protein, isoform CRA_a OS=Homo sapiens OX=9606 GN=MFGE8 PE=4 SV=1                                                            | 43                        | 11                      | 39                  | 11                             | 387                | 43.1     | 8.15                  | 108.34                        | 11                                  |
| A0A024RD80 | Heat shock protein 90kDa alpha (Cytosolic), class B member 1, isoform CRA_a OS=Homo sapiens OX=9606 GN=HSP90AB1 PE=3 SV=1                                  | 10                        | 6                       | 9                   | 2                              | 724                | 83.2     | 5.03                  | 19.27                         | 6                                   |
| A0A024RDW8 | Collagen, type IV, alpha 2, isoform CRA_a OS=Homo sapiens OX=9606 GN=COL4A2 PE=4 SV=1                                                                      | 38                        | 34                      | 110                 | 34                             | 1712               | 167.4    | 8.66                  | 327.45                        | 34                                  |
| A0A087WTA8 | Collagen alpha-2(I) chain OS=Homo sapiens OX=9606 GN=COL1A2 PE=1 SV=1                                                                                      | 59                        | 43                      | 1306                | 43                             | 1364               | 129.1    | 9.01                  | 4431.48                       | 43                                  |
| A0A087WVQ6 | Clathrin heavy chain OS=Homo sapiens OX=9606 GN=CLTC PE=1 SV=1                                                                                             | 1                         | 2                       | 4                   | 2                              | 1679               | 191.9    | 5.69                  | 8.25                          | 2                                   |

| Accession  | Description                                                                                                         | Coverage [%] <sup>a</sup> | # Peptides <sup>b</sup> | # PSMs <sup>c</sup> | # Unique Peptides <sup>d</sup> | # AAs <sup>e</sup> | MW [kDa] | Calc. pI | Score Sequest HT <sup>g</sup> | # Peptides: Sequest HT <sup>h</sup> |
|------------|---------------------------------------------------------------------------------------------------------------------|---------------------------|-------------------------|---------------------|--------------------------------|--------------------|----------|----------|-------------------------------|-------------------------------------|
| A0A087X0K0 | Collagen alpha-1(XV) chain OS=Homo sapiens OX=9606 GN=COL15A1 PE=1 SV=1                                             | 1                         | 1                       | 3                   | 1                              | 1374               | 140      | 4.98     | 6.73                          | 1                                   |
| A0A087WYD1 | AP-2 complex subunit beta (Fragment) OS=Homo sapiens OX=9606 GN=AP2B1 PE=1 SV=1                                     | 3                         | 1                       | 1                   | 1                              | 639                | 70.9     | 5.06     | 3                             | 1                                   |
| A0A087X0S5 | Collagen alpha-1(VI) chain OS=Homo sapiens OX=9606 GN=COL6A1 PE=1 SV=1                                              | 47                        | 29                      | 248                 | 29                             | 1026               | 108.3    | 5.43     | 802.58                        | 29                                  |
| A0A090N8G0 | Glycyl-tRNA synthetase OS=Homo sapiens OX=9606 GN=GARS PE=4 SV=1                                                    | 4                         | 2                       | 2                   | 2                              | 685                | 77.5     | 6.24     | 4.35                          | 2                                   |
| A0A090N8Y2 | Protein disulfide-isomerase A4 OS=Homo sapiens OX=9606 GN=ERP70 PE=2 SV=1                                           | 2                         | 1                       | 3                   | 1                              | 645                | 72.9     | 5.07     | 6.74                          | 1                                   |
| A0A0A0MT01 | Gelsolin OS=Homo sapiens OX=9606 GN=GSN PE=1 SV=1                                                                   | 19                        | 9                       | 20                  | 8                              | 767                | 84.7     | 5.83     | 59.11                         | 9                                   |
| A0A0A0MTS2 | Glucose-6-phosphate isomerase (Fragment) OS=Homo sapiens OX=9606 GN=GPI PE=1 SV=1                                   | 5                         | 2                       | 4                   | 2                              | 573                | 64.8     | 9.04     | 10.05                         | 2                                   |
| A0A0F7G8J1 | Plasminogen OS=Homo sapiens OX=9606 GN=PLG PE=2 SV=1                                                                | 2                         | 2                       | 6                   | 2                              | 809                | 90.6     | 7.36     | 15.86                         | 2                                   |
| A0A0S2Z3G9 | Actinin alpha 4 isoform 1 (Fragment) OS=Homo sapiens OX=9606 GN=ACTN4 PE=2 SV=1                                     | 39                        | 27                      | 65                  | 17                             | 911                | 104.8    | 5.44     | 165.24                        | 27                                  |
| A0A140VJ17 | Testicular tissue protein Li 61 OS=Homo sapiens OX=9606 PE=2 SV=1                                                   | 30                        | 9                       | 24                  | 9                              | 540                | 60.6     | 6.71     | 77.95                         | 9                                   |
| A0A146E5L3 | Mesenchymal stromal cell-and fibroblast-expressing Linx paralogue OS=Homo sapiens OX=9606 GN=Meflin PE=2 SV=1       | 20                        | 5                       | 20                  | 5                              | 428                | 46       | 5.15     | 57.62                         | 5                                   |
| A0A161I202 | Lactoferrin OS=Homo sapiens OX=9606 GN=LTF PE=2 SV=1                                                                | 3                         | 2                       | 7                   | 2                              | 711                | 78.3     | 8.18     | 14.75                         | 2                                   |
| A0A172Q381 | Endosialin (Fragment) OS=Homo sapiens OX=9606 GN=TEM1 PE=2 SV=1                                                     | 7                         | 2                       | 4                   | 2                              | 668                | 71.2     | 5.01     | 10.9                          | 2                                   |
| A0A1B0GU92 | Uncharacterized protein OS=Homo sapiens OX=9606 PE=1 SV=1                                                           | 4                         | 2                       | 3                   | 2                              | 557                | 59.8     | 6.62     | 6.77                          | 2                                   |
| A0A1B0GUS4 | Ubiquitin-conjugating enzyme E2 L5 OS=Homo sapiens OX=9606 GN=UBE2L5 PE=2 SV=1                                      | 26                        | 2                       | 2                   | 2                              | 154                | 17.9     | 7.84     | 5.02                          | 2                                   |
| A0A2R8Y6G6 | Alpha-enolase OS=Homo sapiens OX=9606 GN=ENO1 PE=1 SV=1                                                             | 44                        | 11                      | 29                  | 11                             | 434                | 47.3     | 6.99     | 86.4                          | 11                                  |
| A0A2U3TZL5 | CD59 glycoprotein (Fragment) OS=Homo sapiens OX=9606 GN=CD59 PE=4 SV=1                                              | 10                        | 1                       | 3                   | 1                              | 120                | 13.3     | 6.25     | 7.82                          | 1                                   |
| A1KY36     | Cell proliferation-inducing protein 41 OS=Homo sapiens OX=9606 PE=2 SV=1                                            | 26                        | 9                       | 20                  | 9                              | 745                | 73.4     | 9.61     | 58.17                         | 9                                   |
| A1L4H1     | Soluble scavenger receptor cysteine-rich domain-containing protein SSC5D OS=Homo sapiens OX=9606 GN=SSC5D PE=1 SV=3 | 6                         | 6                       | 12                  | 6                              | 1573               | 165.6    | 6.13     | 26.99                         | 6                                   |
| A3KC71     | Nuclear envelope protein okuribin OS=Homo sapiens OX=9606 GN=okuribin PE=2 SV=1                                     | 25                        | 18                      | 53                  | 18                             | 950                | 108.1    | 9.72     | 156.78                        | 18                                  |
| A3KPE2     | Apolipoprotein C-III OS=Homo sapiens OX=9606 GN=APOC3 PE=2 SV=1                                                     | 16                        | 1                       | 3                   | 1                              | 99                 | 10.8     | 5.41     | 7.18                          | 1                                   |
| A4D1M3     | Carboxypeptidase A4 OS=Homo sapiens OX=9606 GN=CPA4 PE=2 SV=1                                                       | 10                        | 3                       | 4                   | 3                              | 421                | 47.3     | 6.7      | 8.98                          | 3                                   |
| A4D1W7     | Inhibin, beta A (Activin A, activin AB alpha polypeptide) OS=Homo sapiens OX=9606 GN=INHBA PE=2 SV=1                | 41                        | 14                      | 51                  | 14                             | 426                | 47.4     | 8.03     | 155.99                        | 14                                  |
| A4D2D2     | Procollagen C-endopeptidase enhancer OS=Homo sapiens OX=9606 GN=PCOLCE PE=4 SV=1                                    | 49                        | 15                      | 53                  | 15                             | 449                | 47.9     | 7.43     | 155.32                        | 15                                  |
| A5PLM9     | Cathepsin L1 OS=Homo sapiens OX=9606 GN=CTSL1 PE=2 SV=1                                                             | 4                         | 1                       | 2                   | 1                              | 333                | 37.5     | 5.45     | 4.32                          | 1                                   |
| A6XMH5     | Beta-2-microglobulin OS=Homo sapiens OX=9606 PE=2 SV=1                                                              | 24                        | 1                       | 6                   | 1                              | 92                 | 10.4     | 8.02     | 21.21                         | 1                                   |
| A6XND1     | Insulin-like growth factor binding protein 3 isoform b OS=Homo sapiens OX=9606 GN=IGFBP3 PE=1 SV=1                  | 38                        | 7                       | 34                  | 7                              | 263                | 29       | 8.46     | 91.18                         | 7                                   |
| A8K2H4     | cDNA FLJ78235 OS=Homo sapiens OX=9606 PE=2 SV=1                                                                     | 26                        | 6                       | 17                  | 6                              | 339                | 37.8     | 6.3      | 44.85                         | 6                                   |

| Accession | Description                                                                                                                                                                                         | Coverage [%] <sup>a</sup> | # Peptides <sup>b</sup> | # PSMs <sup>c</sup> | # Unique Peptides <sup>d</sup> | # AAs <sup>e</sup> | MW [kDa] | Calc. pI | Score Sequest HT <sup>g</sup> | # Peptides: Sequest HT <sup>h</sup> |
|-----------|-----------------------------------------------------------------------------------------------------------------------------------------------------------------------------------------------------|---------------------------|-------------------------|---------------------|--------------------------------|--------------------|----------|----------|-------------------------------|-------------------------------------|
| A8K2Q6    | Peptidyl-prolyl cis-trans isomerase OS=Homo sapiens OX=9606 PE=2 SV=1                                                                                                                               | 6                         | 1                       | 1                   | 1                              | 212                | 22.7     | 8.4      | 2.15                          | 1                                   |
| A8K3K1    | cDNA FLJ78096, highly similar to Homo sapiens actin, alpha, cardiac muscle (ACTC), mRNA OS=Homo sapiens OX=9606 PE=2 SV=1                                                                           | 20                        | 6                       | 29                  | 2                              | 377                | 42       | 5.39     | 73.41                         | 6                                   |
| A8K3Q2    | cDNA FLJ75319, highly similar to Homo sapiens ADAMTS-like 1 (ADAMTSL1), transcript variant 2, mRNA OS=Homo sapiens OX=9606 PE=2 SV=1                                                                | 11                        | 4                       | 6                   | 4                              | 525                | 58.4     | 6.57     | 14.14                         | 4                                   |
| A8K491    | cDNA FLJ76037, highly similar to Homo sapiens matrilin 3 (MATN3), mRNA OS=Homo sapiens OX=9606 PE=2 SV=1                                                                                            | 3                         | 1                       | 2                   | 1                              | 486                | 52.8     | 6.7      | 4.35                          | 1                                   |
| A8K6C9    | cDNA FLJ78037, highly similar to Homo sapiens insulin-like growth factor 2 (somatomedin A), mRNA OS=Homo sapiens OX=9606 PE=2 SV=1                                                                  | 14                        | 2                       | 4                   | 2                              | 180                | 20.2     | 9.32     | 8.33                          | 2                                   |
| A8K7Q1    | cDNA FLJ77770, highly similar to Homo sapiens nucleobindin 1 (NUCB1), mRNA OS=Homo sapiens OX=9606 PE=2 SV=1                                                                                        | 36                        | 11                      | 36                  | 11                             | 461                | 53.9     | 5.25     | 98.37                         | 11                                  |
| A8K7T4    | cDNA FLJ75774, highly similar to Homo sapiens lectin, mannose-binding 2 (LMAN2), mRNA OS=Homo sapiens OX=9606 PE=2 SV=1                                                                             | 8                         | 2                       | 3                   | 2                              | 356                | 40.2     | 6.95     | 8.14                          | 2                                   |
| A8KAJ3    | cDNA FLJ77823, highly similar to Homo sapiens EGF-containing fibulin-like extracellular matrix protein 1, transcript variant 3, mRNA OS=Homo sapiens OX=9606 PE=2 SV=1                              | 36                        | 11                      | 38                  | 11                             | 493                | 54.6     | 5.14     | 110.35                        | 11                                  |
| B1AKZ4    | Phosphoprotein enriched in astrocytes 15, isoform CRA_a OS=Homo sapiens OX=9606 GN=PEA15 PE=2 SV=1                                                                                                  | 9                         | 1                       | 3                   | 1                              | 130                | 15       | 5.02     | 7.65                          | 1                                   |
| B2R582    | cDNA, FLJ92374, highly similar to Homo sapiens C-type lectin domain family 3, member B (CLEC3B), mRNA OS=Homo sapiens OX=9606 PE=2 SV=1                                                             | 41                        | 7                       | 21                  | 1                              | 202                | 22.5     | 6.04     | 53.32                         | 7                                   |
| B2R5H0    | Protein S100 OS=Homo sapiens OX=9606 PE=2 SV=1                                                                                                                                                      | 15                        | 1                       | 4                   | 1                              | 105                | 11.7     | 7.18     | 10.77                         | 1                                   |
| B2R5M9    | cDNA, FLJ92537, highly similar to Homo sapiens procollagen-lysine, 2-oxoglutarate 5-dioxygenase (lysine hydroxylase, Ehlers-Danlos syndrome type VI) (PLOD), mRNA OS=Homo sapiens OX=9606 PE=2 SV=1 | 17                        | 9                       | 23                  | 9                              | 727                | 83.5     | 7.02     | 56.51                         | 9                                   |
| B2R7T8    | cDNA, FLJ93598, highly similar to Homo sapiens capping protein (actin filament) muscle Z-line, beta (CAPZB), mRNA OS=Homo sapiens OX=9606 PE=2 SV=1                                                 | 10                        | 2                       | 4                   | 2                              | 272                | 30.6     | 6        | 9.07                          | 2                                   |
| B2RBS8    | cDNA, FLJ95666, highly similar to Homo sapiens albumin (ALB), mRNA OS=Homo sapiens OX=9606 PE=2 SV=1                                                                                                | 2                         | 2                       | 20                  | 2                              | 609                | 69.3     | 6.28     | 55.23                         | 2                                   |
| B2RCM5    | cDNA, FLJ96160, highly similar to Homo sapiens EGF-containing fibulin-like extracellular matrix protein 2 (EFEMP2), mRNA OS=Homo sapiens OX=9606 PE=2 SV=1                                          | 26                        | 8                       | 18                  | 8                              | 443                | 49.3     | 4.94     | 46.16                         | 8                                   |
| B2RDW0    | cDNA, FLJ96792, highly similar to Homo sapiens calmodulin 2 (phosphorylase kinase, delta) (CALM2), mRNA OS=Homo sapiens OX=9606 PE=2 SV=1                                                           | 21                        | 2                       | 4                   | 2                              | 149                | 16.8     | 4.22     | 12.4                          | 2                                   |
| B3KQQ9    | cDNA PSEC0048 fis, clone NT2RP2000028, highly similar to Serine protease 23 OS=Homo sapiens OX=9606 PE=2 SV=1                                                                                       | 25                        | 5                       | 14                  | 5                              | 383                | 43       | 9.36     | 39.99                         | 5                                   |
| B3KQT9    | Protein disulfide-isomerase OS=Homo sapiens OX=9606 PE=2 SV=1                                                                                                                                       | 18                        | 6                       | 11                  | 6                              | 480                | 54.1     | 7.21     | 25.16                         | 6                                   |
| B3KY04    | cDNA FLJ46506 fis, clone THYMU3030752, highly similar to BTB/POZ domain-containing protein KCTD12 OS=Homo sapiens OX=9606 PE=2 SV=1                                                                 | 22                        | 5                       | 5                   | 5                              | 325                | 35.7     | 5.64     | 10.44                         | 5                                   |
| B4DDQ2    | Biglycan OS=Homo sapiens OX=9606 PE=2 SV=1                                                                                                                                                          | 55                        | 13                      | 118                 | 13                             | 334                | 37.6     | 7.97     | 363.13                        | 13                                  |
| B4DE78    | cDNA FLJ52141, highly similar to 14-3-3 protein gamma OS=Homo sapiens OX=9606 PE=2 SV=1                                                                                                             | 12                        | 2                       | 3                   | 1                              | 207                | 23.5     | 4.82     | 8.03                          | 2                                   |
| B4DF70    | cDNA FLJ60461, highly similar to Peroxiredoxin-2 OS=Homo sapiens OX=9606 PE=2 SV=1                                                                                                                  | 21                        | 3                       | 6                   | 2                              | 183                | 20.1     | 8.78     | 13.4                          | 3                                   |
| B4DFL3    | cDNA FLJ56661, highly similar to Proteasome subunit beta type 4 OS=Homo sapiens OX=9606 PE=2 SV=1                                                                                                   | 13                        | 1                       | 2                   | 1                              | 167                | 18.3     | 9.35     | 5.74                          | 1                                   |
| B4DJ30    | cDNA FLJ61290, highly similar to Neutral alpha-glucosidase AB OS=Homo sapiens OX=9606 PE=2 SV=1                                                                                                     | 6                         | 4                       | 4                   | 4                              | 995                | 112.9    | 6.06     | 9.26                          | 4                                   |
| B4DJ14    | cDNA FLJ58065, highly similar to LIM and SH3 domain protein 1 OS=Homo sapiens OX=9606 PE=2 SV=1                                                                                                     | 6                         | 1                       | 2                   | 1                              | 220                | 24.5     | 8.54     | 3.93                          | 1                                   |
| B4DKJ4    | cDNA FLJ57738, highly similar to Translationally-controlled tumor protein OS=Homo sapiens OX=9606 PE=2 SV=1                                                                                         | 10                        | 1                       | 1                   | 1                              | 142                | 16.1     | 4.68     | 2.47                          | 1                                   |
| B4DKZ9    | cDNA FLJ55705, highly similar to Threonyl-tRNA synthetase, cytoplasmic OS=Homo sapiens OX=9606 PE=2 SV=1                                                                                            | 2                         | 1                       | 1                   | 1                              | 602                | 70.3     | 8.56     | 2.41                          | 1                                   |

| Accession | Description                                                                                                                     | Coverage [%] <sup>a</sup> | # Peptides <sup>b</sup> | # PSMs <sup>c</sup> | # Unique Peptides <sup>d</sup> | # AAs <sup>e</sup> | MW [kDa] | Calc. pI | Score Sequest HT <sup>g</sup> | # Peptides: Sequest HT <sup>h</sup> |
|-----------|---------------------------------------------------------------------------------------------------------------------------------|---------------------------|-------------------------|---------------------|--------------------------------|--------------------|----------|----------|-------------------------------|-------------------------------------|
| B4DLV7    | Rab GDP dissociation inhibitor OS=Homo sapiens OX=9606 PE=2 SV=1                                                                | 34                        | 10                      | 15                  | 10                             | 449                | 51.1     | 8.18     | 37.21                         | 10                                  |
| B4DM79    | cDNA FLJ53848, highly similar to Inter-alpha-trypsin inhibitor heavy chain H2 OS=Homo sapiens OX=9606 PE=2 SV=1                 | 8                         | 4                       | 8                   | 4                              | 543                | 60.7     | 5.35     | 19.91                         | 4                                   |
| B4DNG0    | cDNA FLJ58142, highly similar to Olfactomedin-like protein 3 OS=Homo sapiens OX=9606 GN=OLFML3 PE=1 SV=1                        | 30                        | 7                       | 18                  | 7                              | 345                | 39       | 6.11     | 43.42                         | 7                                   |
| B4DNH1    | Profilin OS=Homo sapiens OX=9606 PE=2 SV=1                                                                                      | 7                         | 1                       | 2                   | 1                              | 188                | 20.8     | 7.83     | 5.85                          | 1                                   |
| B4DPH4    | cDNA FLJ58778, highly similar to Plasminogen OS=Homo sapiens OX=9606 PE=2 SV=1                                                  | 4                         | 1                       | 3                   | 1                              | 407                | 44.9     | 7.46     | 9.41                          | 1                                   |
| B4DPQ0    | Complement C1r subcomponent OS=Homo sapiens OX=9606 GN=C1R PE=1 SV=1                                                            | 44                        | 19                      | 71                  | 19                             | 719                | 81.8     | 6.37     | 229.77                        | 19                                  |
| B4DPZ5    | cDNA FLJ53495, highly similar to Polymerase I and transcript release factor OS=Homo sapiens OX=9606 PE=2 SV=1                   | 8                         | 2                       | 3                   | 2                              | 363                | 40.5     | 5.25     | 6.78                          | 2                                   |
| B4DRV4    | cDNA FLJ55667, highly similar to Secreted protein acidic and rich in cysteine OS=Homo sapiens OX=9606 PE=2 SV=1                 | 70                        | 13                      | 326                 | 1                              | 212                | 24.7     | 5.62     | 1183.62                       | 13                                  |
| B4DU16    | cDNA FLJ54550, highly similar to Homo sapiens fibronectin 1 (FN1), transcript variant 6, mRNA OS=Homo sapiens OX=9606 PE=2 SV=1 | 68                        | 40                      | 716                 | 2                              | 894                | 98.1     | 6.24     | 2346.26                       | 40                                  |
| B4DU62    | cDNA FLJ54154, highly similar to EH-domain-containing protein 2 OS=Homo sapiens OX=9606 PE=2 SV=1                               | 6                         | 1                       | 2                   | 1                              | 185                | 20.6     | 5.08     | 4.96                          | 1                                   |
| B4DUQ1    | cDNA FLJ54552, highly similar to Heterogeneous nuclear ribonucleoprotein K OS=Homo sapiens OX=9606 PE=2 SV=1                    | 7                         | 2                       | 3                   | 2                              | 439                | 48.5     | 5.92     | 6.12                          | 2                                   |
| B4DWC4    | Chloride intracellular channel protein OS=Homo sapiens OX=9606 PE=2 SV=1                                                        | 22                        | 4                       | 13                  | 4                              | 245                | 27.8     | 6.38     | 33.05                         | 4                                   |
| B4E1N8    | cDNA FLJ51183, highly similar to Extracellular matrix protein 2 OS=Homo sapiens OX=9606 PE=2 SV=1                               | 5                         | 3                       | 8                   | 3                              | 618                | 70.7     | 6.04     | 19.78                         | 3                                   |
| B4E3Q1    | cDNA FLJ61580, highly similar to Calsyntenin-1 OS=Homo sapiens OX=9606 PE=2 SV=1                                                | 14                        | 9                       | 22                  | 9                              | 962                | 107.7    | 4.97     | 63.39                         | 9                                   |
| B7Z1Y2    | Fructose-bisphosphate aldolase OS=Homo sapiens OX=9606 PE=2 SV=1                                                                | 15                        | 2                       | 5                   | 1                              | 345                | 37.5     | 7.12     | 13.79                         | 2                                   |
| C9JIZ6    | Prosaposin OS=Homo sapiens OX=9606 GN=PSAP PE=1 SV=2                                                                            | 7                         | 3                       | 8                   | 3                              | 527                | 58.4     | 5.17     | 19.93                         | 3                                   |
| D0PNI1    | Epididymis luminal protein 4 OS=Homo sapiens OX=9606 GN=YWHAZ PE=2 SV=1                                                         | 29                        | 5                       | 16                  | 4                              | 245                | 27.7     | 4.79     | 37.84                         | 5                                   |
| D0PNI2    | Lysyl oxidase OS=Homo sapiens OX=9606 GN=LOX PE=4 SV=1                                                                          | 30                        | 8                       | 24                  | 8                              | 417                | 46.9     | 8.09     | 63.7                          | 8                                   |
| D1MGQ2    | Alpha-2 globin chain OS=Homo sapiens OX=9606 GN=HBA2 PE=3 SV=1                                                                  | 35                        | 4                       | 18                  | 4                              | 142                | 15.2     | 8.68     | 46.14                         | 4                                   |
| D3DT71    | Collagen, type XI, alpha 1, isoform CRA_b OS=Homo sapiens OX=9606 GN=COL11A1 PE=4 SV=1                                          | 7                         | 6                       | 20                  | 4                              | 1767               | 176.5    | 5.38     | 59.26                         | 6                                   |
| D3DTX7    | Collagen, type I, alpha 1, isoform CRA_a OS=Homo sapiens OX=9606 GN=COL1A1 PE=4 SV=1                                            | 64                        | 32                      | 489                 | 2                              | 885                | 84.7     | 6.24     | 1620.85                       | 32                                  |
| D3YTG3    | Target of Nesh-SH3 OS=Homo sapiens OX=9606 GN=ABI3BP PE=1 SV=1                                                                  | 6                         | 8                       | 18                  | 8                              | 1777               | 195.2    | 9.73     | 46.01                         | 8                                   |
| D6RER5    | Septin-11 OS=Homo sapiens OX=9606 GN=SEPT11 PE=1 SV=1                                                                           | 3                         | 1                       | 3                   | 1                              | 432                | 49.8     | 6.68     | 6.36                          | 1                                   |
| D6RF35    | Vitamin D-binding protein OS=Homo sapiens OX=9606 GN=GC PE=1 SV=1                                                               | 8                         | 2                       | 8                   | 2                              | 476                | 53       | 5.52     | 24.26                         | 2                                   |
| D6RH06    | PDZ and LIM domain protein 7 (Fragment) OS=Homo sapiens OX=9606 GN=PDLIM7 PE=1 SV=1                                             | 4                         | 1                       | 1                   | 1                              | 287                | 30.5     | 9.25     | 2.02                          | 1                                   |
| D9ZGF2    | Collagen, type VI, alpha 3 OS=Homo sapiens OX=9606 GN=COL6A3 PE=4 SV=1                                                          | 34                        | 68                      | 204                 | 68                             | 3177               | 343.5    | 6.68     | 563.85                        | 68                                  |
| D9ZGG2    | Vitronectin OS=Homo sapiens OX=9606 GN=VTN PE=4 SV=1                                                                            | 3                         | 1                       | 3                   | 1                              | 478                | 54.3     | 5.8      | 7.57                          | 1                                   |
| E7ETU9    | Procollagen-lysine,2-oxoglutarate 5-dioxygenase 2 OS=Homo sapiens OX=9606 GN=PLOD2 PE=1 SV=1                                    | 2                         | 1                       | 2                   | 1                              | 703                | 81.1     | 6.65     | 4.23                          | 1                                   |

| Accession | Description                                                                                          | Coverage [%] <sup>a</sup> | # Peptides <sup>b</sup> | # PSMs <sup>c</sup> | # Unique Peptides <sup>d</sup> | # AAs <sup>e</sup> | MW [kDa] | Calc. pI | Score Sequest HT <sup>g</sup> | # Peptides: Sequest HT <sup>h</sup> |
|-----------|------------------------------------------------------------------------------------------------------|---------------------------|-------------------------|---------------------|--------------------------------|--------------------|----------|----------|-------------------------------|-------------------------------------|
| E9PDU6    | Calponin (Fragment) OS=Homo sapiens OX=9606 GN=CNN3 PE=1 SV=1                                        | 6                         | 1                       | 3                   | 1                              | 185                | 20.2     | 9.42     | 6.34                          | 1                                   |
| E9PHK0    | Tetranectin OS=Homo sapiens OX=9606 GN=CLEC3B PE=1 SV=1                                              | 52                        | 7                       | 19                  | 1                              | 160                | 17.8     | 5.05     | 46.92                         | 7                                   |
| E9PL57    | NEDD8-MDP1 readthrough (Fragment) OS=Homo sapiens OX=9606 GN=NEDD8-MDP1 PE=4 SV=1                    | 8                         | 1                       | 1                   | 1                              | 170                | 19.5     | 7.43     | 1.94                          | 1                                   |
| E9PRJ8    | Tetraspanin (Fragment) OS=Homo sapiens OX=9606 GN=CD81 PE=1 SV=1                                     | 21                        | 2                       | 3                   | 2                              | 209                | 22.5     | 6.15     | 10.37                         | 2                                   |
| F5H365    | Protein transport protein SEC23 OS=Homo sapiens OX=9606 GN=SEC23A PE=1 SV=1                          | 2                         | 1                       | 1                   | 1                              | 736                | 82.9     | 7.46     | 2.76                          | 1                                   |
| F6RFD5    | Dextrin OS=Homo sapiens OX=9606 GN=DSTN PE=1 SV=1                                                    | 26                        | 3                       | 7                   | 3                              | 135                | 15.4     | 8.59     | 16.72                         | 3                                   |
| F6WIT2    | Serine/threonine-protein phosphatase 2A activator OS=Homo sapiens OX=9606 GN=PTPA PE=1 SV=1          | 3                         | 1                       | 1                   | 1                              | 288                | 32.9     | 6.93     | 2.05                          | 1                                   |
| F8VR42    | Dynein regulatory complex subunit 2 (Fragment) OS=Homo sapiens OX=9606 GN=CCDC65 PE=1 SV=1           | 3                         | 1                       | 3                   | 1                              | 373                | 44       | 9.25     | 5.78                          | 1                                   |
| F8W6I7    | Heterogeneous nuclear ribonucleoprotein A1 OS=Homo sapiens OX=9606 GN=HNRNPA1 PE=1 SV=2              | 3                         | 1                       | 3                   | 1                              | 307                | 33.1     | 9.13     | 7.46                          | 1                                   |
| G3V3A0    | Alpha-1-antichymotrypsin OS=Homo sapiens OX=9606 GN=SERPINA3 PE=1 SV=1                               | 5                         | 1                       | 1                   | 1                              | 205                | 23.4     | 5.64     | 2.1                           | 1                                   |
| G3V3E8    | NPC intracellular cholesterol transporter 2 OS=Homo sapiens OX=9606 GN=NPC2 PE=1 SV=1                | 22                        | 2                       | 6                   | 2                              | 174                | 19.2     | 8.44     | 14.37                         | 2                                   |
| G3V4U0    | Fibulin-5 OS=Homo sapiens OX=9606 GN=FBLN5 PE=1 SV=1                                                 | 5                         | 2                       | 2                   | 2                              | 453                | 50.8     | 4.77     | 3.86                          | 2                                   |
| H0UI49    | Laminin, alpha 4, isoform CRA_b OS=Homo sapiens OX=9606 GN=LAMA4 PE=4 SV=1                           | 11                        | 13                      | 30                  | 13                             | 1816               | 201.7    | 6.3      | 78.78                         | 13                                  |
| H0Y8C6    | Importin-5 (Fragment) OS=Homo sapiens OX=9606 GN=IPO5 PE=1 SV=1                                      | 4                         | 3                       | 5                   | 3                              | 1099               | 123.8    | 5.06     | 11.19                         | 3                                   |
| H0YEK9    | UPF0598 protein C8orf82 (Fragment) OS=Homo sapiens OX=9606 GN=C8orf82 PE=4 SV=1                      | 14                        | 1                       | 1                   | 1                              | 134                | 13.8     | 10.92    | 2.2                           | 1                                   |
| H0YGS3    | Microfibrillar-associated protein 5 (Fragment) OS=Homo sapiens OX=9606 GN=MFAP5 PE=1 SV=1            | 34                        | 2                       | 9                   | 2                              | 79                 | 9.4      | 9.47     | 25.69                         | 2                                   |
| H3BT71    | RNA-binding motif protein, X chromosome OS=Homo sapiens OX=9606 GN=RBMX PE=1 SV=1                    | 5                         | 1                       | 2                   | 1                              | 296                | 32.2     | 9.91     | 3.92                          | 1                                   |
| H6VRF8    | Keratin 1 OS=Homo sapiens OX=9606 GN=KRT1 PE=3 SV=1                                                  | 9                         | 5                       | 9                   | 5                              | 644                | 66       | 8.12     | 19.26                         | 5                                   |
| H7BZJ3    | Protein disulfide-isomerase A3 (Fragment) OS=Homo sapiens OX=9606 GN=PDIA3 PE=1 SV=1                 | 11                        | 1                       | 3                   | 1                              | 123                | 13.5     | 7.3      | 6.48                          | 1                                   |
| H7C0V9    | Amyloid-beta A4 protein (Fragment) OS=Homo sapiens OX=9606 GN=APP PE=1 SV=1                          | 4                         | 1                       | 1                   | 1                              | 485                | 55.1     | 4.82     | 2.42                          | 1                                   |
| I3L1J9    | Tumor necrosis factor receptor superfamily member 12A OS=Homo sapiens OX=9606 GN=TNFRSF12A PE=1 SV=1 | 25                        | 1                       | 2                   | 1                              | 80                 | 8.7      | 8.31     | 8.72                          | 1                                   |
| I3L397    | Eukaryotic translation initiation factor 5A (Fragment) OS=Homo sapiens OX=9606 GN=EIF5A PE=1 SV=8    | 37                        | 3                       | 3                   | 3                              | 146                | 16       | 5        | 7.92                          | 3                                   |
| I4AY87    | Macrophage migration inhibitory factor (Fragment) OS=Homo sapiens OX=9606 GN=MIF PE=1 SV=1           | 18                        | 2                       | 6                   | 2                              | 115                | 12.5     | 7.88     | 14.83                         | 2                                   |
| K7ENT6    | Tropomyosin alpha-4 chain OS=Homo sapiens OX=9606 GN=TPM4 PE=1 SV=2                                  | 26                        | 7                       | 29                  | 1                              | 247                | 28.5     | 4.63     | 73.53                         | 7                                   |
| K9JA46    | Epididymis luminal secretory protein 52 OS=Homo sapiens OX=9606 GN=EL52 PE=2 SV=1                    | 11                        | 5                       | 8                   | 2                              | 732                | 84.6     | 5.02     | 17.52                         | 5                                   |
| M0R261    | 6-phosphogluconolactonase (Fragment) OS=Homo sapiens OX=9606 GN=PGLS PE=1 SV=1                       | 13                        | 2                       | 2                   | 2                              | 216                | 23       | 5.86     | 4.71                          | 2                                   |
| M1VE83    | Tyrosine-protein kinase receptor OS=Homo sapiens OX=9606 GN=SDC4-ROS1_S4;R34 PE=2 SV=1               | 2                         | 1                       | 2                   | 1                              | 643                | 71.6     | 4.81     | 4.77                          | 1                                   |
| O00245    | EXTL2 (Fragment) OS=Homo sapiens OX=9606 GN=EXTL2 PE=2 SV=1                                          | 9                         | 1                       | 1                   | 1                              | 129                | 14.7     | 8.43     | 1.93                          | 1                                   |

| Accession | Description                                                                                                   | Coverage [%] <sup>a</sup> | # Peptides <sup>b</sup> | # PSMs <sup>c</sup> | # Unique Peptides <sup>d</sup> | # AAs <sup>e</sup> | MW [kDa] | Calc. pI | Score Sequest HT <sup>g</sup> | # Peptides: Sequest HT <sup>h</sup> |
|-----------|---------------------------------------------------------------------------------------------------------------|---------------------------|-------------------------|---------------------|--------------------------------|--------------------|----------|----------|-------------------------------|-------------------------------------|
| O00300    | Tumor necrosis factor receptor superfamily member 11B OS=Homo sapiens OX=9606 GN=TNFRSF11B PE=1 SV=3          | 15                        | 4                       | 8                   | 4                              | 401                | 46       | 8.29     | 18.01                         | 4                                   |
| O00391    | Sulfhydryl oxidase 1 OS=Homo sapiens OX=9606 GN=QSOX1 PE=1 SV=3                                               | 44                        | 24                      | 81                  | 24                             | 747                | 82.5     | 8.92     | 256.16                        | 24                                  |
| O00462    | Beta-mannosidase OS=Homo sapiens OX=9606 GN=MANBA PE=2 SV=3                                                   | 1                         | 1                       | 1                   | 1                              | 879                | 100.8    | 5.52     | 1.96                          | 1                                   |
| O00468    | Agrin OS=Homo sapiens OX=9606 GN=AGRN PE=1 SV=6                                                               | 3                         | 4                       | 8                   | 4                              | 2068               | 217.2    | 6.39     | 17.4                          | 4                                   |
| O14950    | Myosin regulatory light chain 12B OS=Homo sapiens OX=9606 GN=MYL12B PE=1 SV=2                                 | 28                        | 4                       | 9                   | 1                              | 172                | 19.8     | 4.84     | 22.04                         | 4                                   |
| O15511    | Actin-related protein 2/3 complex subunit 5 OS=Homo sapiens OX=9606 GN=ARPC5 PE=1 SV=3                        | 21                        | 2                       | 4                   | 2                              | 151                | 16.3     | 5.67     | 8.83                          | 2                                   |
| O43854    | EGF-like repeat and discoidin I-like domain-containing protein 3 OS=Homo sapiens OX=9606 GN=EDIL3 PE=1 SV=1   | 20                        | 6                       | 11                  | 6                              | 480                | 53.7     | 7.28     | 27.64                         | 6                                   |
| O60565    | Gremlin-1 OS=Homo sapiens OX=9606 GN=GREM1 PE=1 SV=1                                                          | 7                         | 1                       | 1                   | 1                              | 184                | 20.7     | 9.39     | 2.28                          | 1                                   |
| O60568    | Procollagen-lysine,2-oxoglutarate 5-dioxygenase 3 OS=Homo sapiens OX=9606 GN=PLOD3 PE=1 SV=1                  | 10                        | 5                       | 8                   | 5                              | 738                | 84.7     | 6.05     | 18.91                         | 5                                   |
| O60664    | Perilipin-3 OS=Homo sapiens OX=9606 GN=PLIN3 PE=1 SV=3                                                        | 11                        | 3                       | 7                   | 3                              | 434                | 47       | 5.44     | 15.5                          | 3                                   |
| O75095    | Multiple epidermal growth factor-like domains protein 6 OS=Homo sapiens OX=9606 GN=MEGF6 PE=1 SV=4            | 4                         | 4                       | 10                  | 1                              | 1541               | 161.1    | 6.38     | 29.4                          | 4                                   |
| O75326    | Semaphorin-7A OS=Homo sapiens OX=9606 GN=SEMA7A PE=1 SV=1                                                     | 11                        | 4                       | 11                  | 4                              | 666                | 74.8     | 7.64     | 30.33                         | 4                                   |
| O95450    | A disintegrin and metalloproteinase with thrombospondin motifs 2 OS=Homo sapiens OX=9606 GN=ADAMTS2 PE=2 SV=2 | 4                         | 3                       | 7                   | 3                              | 1211               | 134.7    | 7.15     | 17.76                         | 3                                   |
| P00338    | L-lactate dehydrogenase A chain OS=Homo sapiens OX=9606 GN=LDHA PE=1 SV=2                                     | 29                        | 7                       | 18                  | 7                              | 332                | 36.7     | 8.27     | 45.05                         | 7                                   |
| P00441    | Superoxide dismutase [Cu-Zn] OS=Homo sapiens OX=9606 GN=SOD1 PE=1 SV=2                                        | 23                        | 2                       | 5                   | 2                              | 154                | 15.9     | 6.13     | 18.54                         | 2                                   |
| P01008    | Antithrombin-III OS=Homo sapiens OX=9606 GN=SERPINC1 PE=1 SV=1                                                | 2                         | 1                       | 3                   | 1                              | 464                | 52.6     | 6.71     | 7.48                          | 1                                   |
| P01023    | Alpha-2-macroglobulin OS=Homo sapiens OX=9606 GN=A2M PE=1 SV=3                                                | 2                         | 3                       | 7                   | 2                              | 1474               | 163.2    | 6.46     | 16.46                         | 3                                   |
| P01024    | Complement C3 OS=Homo sapiens OX=9606 GN=C3 PE=1 SV=2                                                         | 5                         | 6                       | 13                  | 6                              | 1663               | 187      | 6.4      | 28.86                         | 6                                   |
| P01033    | Metalloproteinase inhibitor 1 OS=Homo sapiens OX=9606 GN=TIMP1 PE=1 SV=1                                      | 61                        | 8                       | 67                  | 8                              | 207                | 23.2     | 8.1      | 219.81                        | 8                                   |
| P01034    | Cystatin-C OS=Homo sapiens OX=9606 GN=CST3 PE=1 SV=1                                                          | 56                        | 6                       | 30                  | 6                              | 146                | 15.8     | 8.75     | 84.86                         | 6                                   |
| P02452    | Collagen alpha-1(I) chain OS=Homo sapiens OX=9606 GN=COL1A1 PE=1 SV=5                                         | 57                        | 44                      | 572                 | 14                             | 1464               | 138.9    | 5.8      | 1865.96                       | 44                                  |
| P02461    | Collagen alpha-1(III) chain OS=Homo sapiens OX=9606 GN=COL3A1 PE=1 SV=4                                       | 30                        | 24                      | 98                  | 24                             | 1466               | 138.5    | 6.61     | 294.53                        | 24                                  |
| P02462    | Collagen alpha-1(IV) chain OS=Homo sapiens OX=9606 GN=COL4A1 PE=1 SV=4                                        | 11                        | 9                       | 33                  | 9                              | 1669               | 160.5    | 8.28     | 96.41                         | 9                                   |
| P02545    | Prelamin-A/C OS=Homo sapiens OX=9606 GN=LMNA PE=1 SV=1                                                        | 30                        | 15                      | 48                  | 15                             | 664                | 74.1     | 7.02     | 126.85                        | 15                                  |
| P02647    | Apolipoprotein A-I OS=Homo sapiens OX=9606 GN=APOA1 PE=1 SV=1                                                 | 6                         | 1                       | 3                   | 1                              | 267                | 30.8     | 5.76     | 10.35                         | 1                                   |
| P04083    | Annexin A1 OS=Homo sapiens OX=9606 GN=ANXA1 PE=1 SV=2                                                         | 34                        | 8                       | 11                  | 8                              | 346                | 38.7     | 7.02     | 27.91                         | 8                                   |
| P04085    | Platelet-derived growth factor subunit A OS=Homo sapiens OX=9606 GN=PDGFA PE=1 SV=1                           | 9                         | 1                       | 2                   | 1                              | 211                | 24       | 9.39     | 4.22                          | 1                                   |
| P04792    | Heat shock protein beta-1 OS=Homo sapiens OX=9606 GN=HSPB1 PE=1 SV=2                                          | 23                        | 2                       | 4                   | 2                              | 205                | 22.8     | 6.4      | 10.44                         | 2                                   |

| Accession | Description                                                                              | Coverage [%] <sup>a</sup> | # Peptides <sup>b</sup> | # PSMS <sup>c</sup> | # Unique Peptides <sup>d</sup> | # AAs <sup>e</sup> | MW [kDa] | Calc. pI | Score Sequest HT <sup>g</sup> | # Peptides: Sequest HT <sup>h</sup> |
|-----------|------------------------------------------------------------------------------------------|---------------------------|-------------------------|---------------------|--------------------------------|--------------------|----------|----------|-------------------------------|-------------------------------------|
| P05387    | 60S acidic ribosomal protein P2 OS=Homo sapiens OX=9606 GN=RPLP2 PE=1 SV=1               | 70                        | 4                       | 5                   | 4                              | 115                | 11.7     | 4.54     | 11.72                         | 4                                   |
| P05997    | Collagen alpha-2(V) chain OS=Homo sapiens OX=9606 GN=COL5A2 PE=1 SV=3                    | 37                        | 29                      | 83                  | 29                             | 1499               | 144.8    | 6.46     | 227.45                        | 29                                  |
| P07585    | Decorin OS=Homo sapiens OX=9606 GN=DCN PE=1 SV=1                                         | 45                        | 13                      | 87                  | 13                             | 359                | 39.7     | 8.54     | 258.75                        | 13                                  |
| P07737    | Profilin-1 OS=Homo sapiens OX=9606 GN=PFN1 PE=1 SV=2                                     | 40                        | 4                       | 20                  | 4                              | 140                | 15       | 8.27     | 52.31                         | 4                                   |
| P07942    | Laminin subunit beta-1 OS=Homo sapiens OX=9606 GN=LAMB1 PE=1 SV=2                        | 15                        | 16                      | 30                  | 16                             | 1786               | 197.9    | 4.94     | 71.58                         | 16                                  |
| P08670    | Vimentin OS=Homo sapiens OX=9606 GN=VIM PE=1 SV=4                                        | 42                        | 20                      | 103                 | 20                             | 466                | 53.6     | 5.12     | 284.53                        | 20                                  |
| P09382    | Galectin-1 OS=Homo sapiens OX=9606 GN=LGALS1 PE=1 SV=2                                   | 35                        | 3                       | 26                  | 3                              | 135                | 14.7     | 5.5      | 75.92                         | 3                                   |
| P09486    | SPARC OS=Homo sapiens OX=9606 GN=SPARC PE=1 SV=1                                         | 56                        | 14                      | 376                 | 2                              | 303                | 34.6     | 4.84     | 1328.13                       | 14                                  |
| P09496-2  | Isoform Non-brain of Clathrin light chain A OS=Homo sapiens OX=9606 GN=CLTA              | 10                        | 1                       | 1                   | 1                              | 218                | 23.6     | 4.53     | 1.95                          | 1                                   |
| P09871    | Complement C1s subcomponent OS=Homo sapiens OX=9606 GN=C1S PE=1 SV=1                     | 40                        | 17                      | 53                  | 17                             | 688                | 76.6     | 4.96     | 148.73                        | 17                                  |
| P10599    | Thioredoxin OS=Homo sapiens OX=9606 GN=TXN PE=1 SV=3                                     | 23                        | 2                       | 6                   | 2                              | 105                | 11.7     | 4.92     | 13.29                         | 2                                   |
| P10909    | Clusterin OS=Homo sapiens OX=9606 GN=CLU PE=1 SV=1                                       | 26                        | 10                      | 33                  | 5                              | 449                | 52.5     | 6.27     | 87.79                         | 10                                  |
| P11047    | Laminin subunit gamma-1 OS=Homo sapiens OX=9606 GN=LAMC1 PE=1 SV=3                       | 20                        | 22                      | 48                  | 22                             | 1609               | 177.5    | 5.12     | 123.7                         | 22                                  |
| P12110    | Collagen alpha-2(VI) chain OS=Homo sapiens OX=9606 GN=COL6A2 PE=1 SV=4                   | 26                        | 18                      | 58                  | 3                              | 1019               | 108.5    | 6.21     | 163.68                        | 18                                  |
| P13489    | Ribonuclease inhibitor OS=Homo sapiens OX=9606 GN=RNH1 PE=1 SV=2                         | 15                        | 5                       | 6                   | 5                              | 461                | 49.9     | 4.82     | 15.15                         | 5                                   |
| P13639    | Elongation factor 2 OS=Homo sapiens OX=9606 GN=EEF2 PE=1 SV=4                            | 7                         | 5                       | 7                   | 5                              | 858                | 95.3     | 6.83     | 15.06                         | 5                                   |
| P14543    | Nidogen-1 OS=Homo sapiens OX=9606 GN=NID1 PE=1 SV=3                                      | 16                        | 12                      | 27                  | 12                             | 1247               | 136.3    | 5.29     | 71.69                         | 12                                  |
| P15291    | Beta-1,4-galactosyltransferase 1 OS=Homo sapiens OX=9606 GN=B4GALT1 PE=1 SV=5            | 20                        | 4                       | 14                  | 4                              | 398                | 43.9     | 8.65     | 36.2                          | 4                                   |
| P18065    | Insulin-like growth factor-binding protein 2 OS=Homo sapiens OX=9606 GN=IGFBP2 PE=1 SV=2 | 38                        | 8                       | 40                  | 8                              | 325                | 34.8     | 7.5      | 121.86                        | 8                                   |
| P18206    | Vinculin OS=Homo sapiens OX=9606 GN=VCL PE=1 SV=4                                        | 23                        | 20                      | 45                  | 20                             | 1134               | 123.7    | 5.66     | 110.67                        | 20                                  |
| P19021    | Peptidyl-glycine alpha-amidating monooxygenase OS=Homo sapiens OX=9606 GN=PAM PE=1 SV=2  | 5                         | 2                       | 3                   | 2                              | 973                | 108.3    | 6.42     | 8.17                          | 2                                   |
| P19022    | Cadherin-2 OS=Homo sapiens OX=9606 GN=CDH2 PE=1 SV=4                                     | 11                        | 7                       | 13                  | 7                              | 906                | 99.7     | 4.81     | 30.8                          | 7                                   |
| P19320    | Vascular cell adhesion protein 1 OS=Homo sapiens OX=9606 GN=VCAM1 PE=1 SV=1              | 12                        | 7                       | 13                  | 7                              | 739                | 81.2     | 5.22     | 32.85                         | 7                                   |
| P21333    | Filamin-A OS=Homo sapiens OX=9606 GN=FLNA PE=1 SV=4                                      | 35                        | 58                      | 169                 | 55                             | 2647               | 280.6    | 6.06     | 476.01                        | 58                                  |
| P21781    | Fibroblast growth factor 7 OS=Homo sapiens OX=9606 GN=FGF7 PE=1 SV=1                     | 5                         | 1                       | 1                   | 1                              | 194                | 22.5     | 9.14     | 2.3                           | 1                                   |
| P23142    | Fibulin-1 OS=Homo sapiens OX=9606 GN=FBLN1 PE=1 SV=4                                     | 30                        | 13                      | 41                  | 13                             | 703                | 77.2     | 5.22     | 113.42                        | 13                                  |
| P23526    | Adenosylhomocysteinase OS=Homo sapiens OX=9606 GN=AHCY PE=1 SV=4                         | 11                        | 4                       | 8                   | 4                              | 432                | 47.7     | 6.34     | 17.72                         | 4                                   |
| P24592    | Insulin-like growth factor-binding protein 6 OS=Homo sapiens OX=9606 GN=IGFBP6 PE=1 SV=1 | 18                        | 3                       | 12                  | 3                              | 240                | 25.3     | 7.81     | 40.35                         | 3                                   |

| Accession | Description                                                                                      | Coverage [%] <sup>a</sup> | # Peptides <sup>b</sup> | # PSMs <sup>c</sup> | # Unique Peptides <sup>d</sup> | # AAs <sup>e</sup> | MW [kDa] | Calc. pI | Score Sequest HT <sup>g</sup> | # Peptides: Sequest HT <sup>h</sup> |
|-----------|--------------------------------------------------------------------------------------------------|---------------------------|-------------------------|---------------------|--------------------------------|--------------------|----------|----------|-------------------------------|-------------------------------------|
| P24844    | Myosin regulatory light polypeptide 9 OS=Homo sapiens OX=9606 GN=MYL9 PE=1 SV=4                  | 40                        | 5                       | 9                   | 2                              | 172                | 19.8     | 4.92     | 22.53                         | 5                                   |
| P26022    | Pentraxin-related protein PTX3 OS=Homo sapiens OX=9606 GN=PTX3 PE=1 SV=3                         | 39                        | 11                      | 51                  | 11                             | 381                | 41.9     | 5.01     | 142.85                        | 11                                  |
| P26038    | Moesin OS=Homo sapiens OX=9606 GN=MSN PE=1 SV=3                                                  | 26                        | 11                      | 21                  | 8                              | 577                | 67.8     | 6.4      | 49.42                         | 11                                  |
| P26641    | Elongation factor 1-gamma OS=Homo sapiens OX=9606 GN=EEF1G PE=1 SV=3                             | 6                         | 2                       | 5                   | 2                              | 437                | 50.1     | 6.67     | 12.22                         | 2                                   |
| P27816    | Microtubule-associated protein 4 OS=Homo sapiens OX=9606 GN=MAP4 PE=1 SV=3                       | 4                         | 3                       | 3                   | 3                              | 1152               | 120.9    | 5.43     | 6.68                          | 3                                   |
| P28072    | Proteasome subunit beta type-6 OS=Homo sapiens OX=9606 GN=PSMB6 PE=1 SV=4                        | 5                         | 1                       | 1                   | 1                              | 239                | 25.3     | 4.92     | 2.31                          | 1                                   |
| P29692    | Elongation factor 1-delta OS=Homo sapiens OX=9606 GN=EEF1D PE=1 SV=5                             | 9                         | 1                       | 1                   | 1                              | 281                | 31.1     | 5.01     | 2.95                          | 1                                   |
| P30040    | Endoplasmic reticulum resident protein 29 OS=Homo sapiens OX=9606 GN=ERP29 PE=1 SV=4             | 5                         | 1                       | 1                   | 1                              | 261                | 29       | 7.31     | 1.91                          | 1                                   |
| P30041    | Peroxiredoxin-6 OS=Homo sapiens OX=9606 GN=PRDX6 PE=1 SV=3                                       | 14                        | 2                       | 4                   | 2                              | 224                | 25       | 6.38     | 9.36                          | 2                                   |
| P30044    | Peroxiredoxin-5, mitochondrial OS=Homo sapiens OX=9606 GN=PRDX5 PE=1 SV=4                        | 13                        | 2                       | 4                   | 2                              | 214                | 22.1     | 8.7      | 8.68                          | 2                                   |
| P30046    | D-dopachrome decarboxylase OS=Homo sapiens OX=9606 GN=DDT PE=1 SV=3                              | 12                        | 1                       | 1                   | 1                              | 118                | 12.7     | 7.3      | 2.35                          | 1                                   |
| P30050    | 60S ribosomal protein L12 OS=Homo sapiens OX=9606 GN=RPL12 PE=1 SV=1                             | 28                        | 3                       | 4                   | 3                              | 165                | 17.8     | 9.42     | 8.92                          | 3                                   |
| P30530    | Tyrosine-protein kinase receptor UFO OS=Homo sapiens OX=9606 GN=AXL PE=1 SV=4                    | 6                         | 4                       | 7                   | 4                              | 894                | 98.3     | 5.39     | 17.28                         | 4                                   |
| P31946    | 14-3-3 protein beta/alpha OS=Homo sapiens OX=9606 GN=YWHAB PE=1 SV=3                             | 17                        | 3                       | 6                   | 2                              | 246                | 28.1     | 4.83     | 13.5                          | 3                                   |
| P35052    | Glypican-1 OS=Homo sapiens OX=9606 GN=GPC1 PE=1 SV=2                                             | 19                        | 7                       | 16                  | 7                              | 558                | 61.6     | 7.3      | 46.56                         | 7                                   |
| P35442    | Thrombospondin-2 OS=Homo sapiens OX=9606 GN=THBS2 PE=1 SV=2                                      | 31                        | 24                      | 73                  | 22                             | 1172               | 129.9    | 4.83     | 201.73                        | 24                                  |
| P35555    | Fibrillin-1 OS=Homo sapiens OX=9606 GN=FBN1 PE=1 SV=3                                            | 26                        | 49                      | 148                 | 49                             | 2871               | 312      | 4.93     | 404.21                        | 49                                  |
| P36955    | Pigment epithelium-derived factor OS=Homo sapiens OX=9606 GN=SERPINF1 PE=1 SV=4                  | 38                        | 11                      | 41                  | 11                             | 418                | 46.3     | 6.38     | 113.88                        | 11                                  |
| P37802    | Transgelin-2 OS=Homo sapiens OX=9606 GN=TAGLN2 PE=1 SV=3                                         | 45                        | 7                       | 19                  | 7                              | 199                | 22.4     | 8.25     | 50.28                         | 7                                   |
| P40925    | Malate dehydrogenase, cytoplasmic OS=Homo sapiens OX=9606 GN=MDH1 PE=1 SV=4                      | 17                        | 4                       | 5                   | 4                              | 334                | 36.4     | 7.36     | 12.65                         | 4                                   |
| P41091    | Eukaryotic translation initiation factor 2 subunit 3 OS=Homo sapiens OX=9606 GN=EIF2S3 PE=1 SV=3 | 5                         | 2                       | 2                   | 2                              | 472                | 51.1     | 8.4      | 4.65                          | 2                                   |
| P41222    | Prostaglandin-H2 D-isomerase OS=Homo sapiens OX=9606 GN=PTGDS PE=1 SV=1                          | 17                        | 2                       | 2                   | 2                              | 190                | 21       | 7.8      | 4.46                          | 2                                   |
| P43251    | Biotinidase OS=Homo sapiens OX=9606 GN=BTB PE=1 SV=2                                             | 7                         | 3                       | 5                   | 3                              | 543                | 61.1     | 6.25     | 10.73                         | 3                                   |
| P48061    | Stromal cell-derived factor 1 OS=Homo sapiens OX=9606 GN=CXCL12 PE=1 SV=1                        | 24                        | 2                       | 4                   | 2                              | 93                 | 10.7     | 9.88     | 11.26                         | 2                                   |
| P49721    | Proteasome subunit beta type-2 OS=Homo sapiens OX=9606 GN=PSMB2 PE=1 SV=1                        | 5                         | 1                       | 2                   | 1                              | 201                | 22.8     | 7.02     | 4.02                          | 1                                   |
| P49767    | Vascular endothelial growth factor C OS=Homo sapiens OX=9606 GN=VEGFC PE=1 SV=1                  | 3                         | 1                       | 2                   | 1                              | 419                | 46.9     | 7.52     | 5.96                          | 1                                   |
| P50454    | Serpin H1 OS=Homo sapiens OX=9606 GN=SERPINH1 PE=1 SV=2                                          | 44                        | 13                      | 34                  | 13                             | 418                | 46.4     | 8.69     | 94.42                         | 13                                  |
| P51884    | Lumican OS=Homo sapiens OX=9606 GN=LUM PE=1 SV=2                                                 | 32                        | 10                      | 69                  | 10                             | 338                | 38.4     | 6.61     | 207.09                        | 10                                  |



| Accession | Description                                                                                     | Coverage [%] <sup>a</sup> | # Peptides <sup>b</sup> | # PSMs <sup>c</sup> | # Unique Peptides <sup>d</sup> | # AAs <sup>e</sup> | MW [kDa] | Calc. pI | Score Sequest HT <sup>g</sup> | # Peptides: Sequest HT <sup>h</sup> |
|-----------|-------------------------------------------------------------------------------------------------|---------------------------|-------------------------|---------------------|--------------------------------|--------------------|----------|----------|-------------------------------|-------------------------------------|
| P51991    | Heterogeneous nuclear ribonucleoprotein A3 OS=Homo sapiens OX=9606 GN=HNRNPA3 PE=1 SV=2         | 3                         | 1                       | 2                   | 1                              | 378                | 39.6     | 9.01     | 3.96                          | 1                                   |
| P52943    | Cysteine-rich protein 2 OS=Homo sapiens OX=9606 GN=CRIP2 PE=1 SV=1                              | 15                        | 1                       | 1                   | 1                              | 208                | 22.5     | 8.72     | 2.93                          | 1                                   |
| P55058    | Phospholipid transfer protein OS=Homo sapiens OX=9606 GN=PLTP PE=1 SV=1                         | 5                         | 2                       | 3                   | 2                              | 493                | 54.7     | 7.01     | 6.35                          | 2                                   |
| P55072    | Transitional endoplasmic reticulum ATPase OS=Homo sapiens OX=9606 GN=VCP PE=1 SV=4              | 11                        | 6                       | 9                   | 6                              | 806                | 89.3     | 5.26     | 20.58                         | 6                                   |
| P55290    | Cadherin-13 OS=Homo sapiens OX=9606 GN=CDH13 PE=1 SV=1                                          | 7                         | 4                       | 7                   | 4                              | 713                | 78.2     | 4.98     | 17.22                         | 4                                   |
| P58546    | Myotrophin OS=Homo sapiens OX=9606 GN=MTPN PE=1 SV=2                                            | 14                        | 1                       | 1                   | 1                              | 118                | 12.9     | 5.52     | 2.64                          | 1                                   |
| P61086    | Ubiquitin-conjugating enzyme E2 K OS=Homo sapiens OX=9606 GN=UBE2K PE=1 SV=3                    | 6                         | 1                       | 1                   | 1                              | 200                | 22.4     | 5.44     | 2.02                          | 1                                   |
| P62328    | Thymosin beta-4 OS=Homo sapiens OX=9606 GN=TMSB4X PE=1 SV=2                                     | 27                        | 1                       | 1                   | 1                              | 44                 | 5.1      | 5.06     | 2.13                          | 1                                   |
| P62937    | Peptidyl-prolyl cis-trans isomerase A OS=Homo sapiens OX=9606 GN=PPIA PE=1 SV=2                 | 32                        | 3                       | 8                   | 3                              | 165                | 18       | 7.81     | 19.19                         | 3                                   |
| P62942    | Peptidyl-prolyl cis-trans isomerase FKBP1A OS=Homo sapiens OX=9606 GN=FKBP1A PE=1 SV=2          | 71                        | 4                       | 8                   | 4                              | 108                | 11.9     | 8.16     | 22.32                         | 4                                   |
| P63261    | Actin, cytoplasmic 2 OS=Homo sapiens OX=9606 GN=ACTG1 PE=1 SV=1                                 | 56                        | 13                      | 81                  | 1                              | 375                | 41.8     | 5.48     | 246.11                        | 13                                  |
| P63313    | Thymosin beta-10 OS=Homo sapiens OX=9606 GN=TMSB10 PE=1 SV=2                                    | 34                        | 1                       | 3                   | 1                              | 44                 | 5        | 5.36     | 9.66                          | 1                                   |
| P67936    | Tropomyosin alpha-4 chain OS=Homo sapiens OX=9606 GN=TPM4 PE=1 SV=3                             | 31                        | 8                       | 37                  | 2                              | 248                | 28.5     | 4.69     | 93.08                         | 8                                   |
| P78539    | Sushi repeat-containing protein SRPX OS=Homo sapiens OX=9606 GN=SRPX PE=1 SV=1                  | 2                         | 1                       | 2                   | 1                              | 464                | 51.5     | 8.66     | 4.08                          | 1                                   |
| P80303    | Nucleobindin-2 OS=Homo sapiens OX=9606 GN=NUCB2 PE=1 SV=3                                       | 8                         | 2                       | 4                   | 2                              | 420                | 50.2     | 5.12     | 11.32                         | 2                                   |
| Q01995    | Transgelin OS=Homo sapiens OX=9606 GN=TAGLN PE=1 SV=4                                           | 44                        | 7                       | 46                  | 7                              | 201                | 22.6     | 8.84     | 119.56                        | 7                                   |
| Q05DH1    | Proteasome subunit alpha type (Fragment) OS=Homo sapiens OX=9606 GN=PSMA7 PE=2 SV=1             | 5                         | 1                       | 2                   | 1                              | 238                | 26.7     | 8.87     | 3.98                          | 1                                   |
| Q06830    | Peroxiredoxin-1 OS=Homo sapiens OX=9606 GN=PRDX1 PE=1 SV=1                                      | 48                        | 6                       | 13                  | 5                              | 199                | 22.1     | 8.13     | 36.61                         | 6                                   |
| Q07092    | Collagen alpha-1(XVI) chain OS=Homo sapiens OX=9606 GN=COL16A1 PE=1 SV=2                        | 4                         | 4                       | 7                   | 4                              | 1604               | 157.7    | 7.84     | 18.43                         | 4                                   |
| Q07954    | Prolow-density lipoprotein receptor-related protein 1 OS=Homo sapiens OX=9606 GN=LRP1 PE=1 SV=2 | 1                         | 5                       | 12                  | 5                              | 4544               | 504.3    | 5.39     | 32.18                         | 5                                   |
| Q08397    | Lysyl oxidase homolog 1 OS=Homo sapiens OX=9606 GN=LOXL1 PE=1 SV=2                              | 10                        | 4                       | 9                   | 4                              | 574                | 63.1     | 7.52     | 22.47                         | 4                                   |
| Q08629    | Testican-1 OS=Homo sapiens OX=9606 GN=SPOCK1 PE=1 SV=1                                          | 19                        | 5                       | 14                  | 5                              | 439                | 49.1     | 6.1      | 36.84                         | 5                                   |
| Q09666    | Neuroblast differentiation-associated protein AHNAK OS=Homo sapiens OX=9606 GN=AHNAK PE=1 SV=2  | 11                        | 21                      | 37                  | 21                             | 5890               | 628.7    | 6.15     | 86.05                         | 21                                  |
| Q0QEN7    | ATP synthase subunit beta (Fragment) OS=Homo sapiens OX=9606 GN=ATP5B PE=2 SV=1                 | 4                         | 1                       | 1                   | 1                              | 445                | 48.1     | 5.07     | 1.94                          | 1                                   |
| Q0Z944    | Beta globin (Fragment) OS=Homo sapiens OX=9606 GN=HBB PE=3 SV=1                                 | 10                        | 1                       | 3                   | 1                              | 105                | 11.5     | 6.37     | 6.82                          | 1                                   |
| Q10471    | Polypeptide N-acetylgalactosaminyltransferase 2 OS=Homo sapiens OX=9606 GN=GALNT2 PE=1 SV=1     | 5                         | 3                       | 6                   | 3                              | 571                | 64.7     | 8.35     | 13.15                         | 3                                   |
| Q12841    | Follistatin-related protein 1 OS=Homo sapiens OX=9606 GN=FSTL1 PE=1 SV=1                        | 40                        | 10                      | 78                  | 10                             | 308                | 35       | 5.52     | 249.28                        | 10                                  |
| Q13219    | Pappalysin-1 OS=Homo sapiens OX=9606 GN=PAPPA PE=1 SV=3                                         | 1                         | 1                       | 3                   | 1                              | 1627               | 180.9    | 6.18     | 6.06                          | 1                                   |

| Accession | Description                                                                                         | Coverage [%] <sup>a</sup> | # Peptides <sup>b</sup> | # PSMs <sup>c</sup> | # Unique Peptides <sup>d</sup> | # AAs <sup>e</sup> | MW [kDa] | Calc. pI | Score Sequest HT <sup>g</sup> | # Peptides: Sequest HT <sup>h</sup> |
|-----------|-----------------------------------------------------------------------------------------------------|---------------------------|-------------------------|---------------------|--------------------------------|--------------------|----------|----------|-------------------------------|-------------------------------------|
| Q13561    | Dynactin subunit 2 OS=Homo sapiens OX=9606 GN=DCTN2 PE=1 SV=4                                       | 4                         | 1                       | 2                   | 1                              | 401                | 44.2     | 5.21     | 4.86                          | 1                                   |
| Q13740    | CD166 antigen OS=Homo sapiens OX=9606 GN=ALCAM PE=1 SV=2                                            | 5                         | 2                       | 3                   | 2                              | 583                | 65.1     | 6.25     | 6.83                          | 2                                   |
| Q14315    | Filamin-C OS=Homo sapiens OX=9606 GN=FLNC PE=1 SV=3                                                 | 5                         | 8                       | 15                  | 4                              | 2725               | 290.8    | 5.97     | 35.95                         | 8                                   |
| Q14393    | Growth arrest-specific protein 6 OS=Homo sapiens OX=9606 GN=GAS6 PE=1 SV=3                          | 19                        | 9                       | 14                  | 9                              | 678                | 74.9     | 5.69     | 37.46                         | 9                                   |
| Q14766    | Latent-transforming growth factor beta-binding protein 1 OS=Homo sapiens OX=9606 GN=LTBP1 PE=1 SV=4 | 11                        | 14                      | 33                  | 14                             | 1721               | 186.7    | 5.96     | 83.41                         | 14                                  |
| Q14767    | Latent-transforming growth factor beta-binding protein 2 OS=Homo sapiens OX=9606 GN=LTBP2 PE=1 SV=3 | 17                        | 18                      | 67                  | 18                             | 1821               | 194.9    | 5.19     | 194.23                        | 18                                  |
| Q15063-4  | Isoform 4 of Periostin OS=Homo sapiens OX=9606 GN=POSTN                                             | 57                        | 27                      | 105                 | 2                              | 751                | 83.8     | 8.18     | 331.57                        | 27                                  |
| Q15063-5  | Isoform 5 of Periostin OS=Homo sapiens OX=9606 GN=POSTN                                             | 57                        | 29                      | 116                 | 4                              | 809                | 90.4     | 7.39     | 366.34                        | 29                                  |
| Q15084    | Protein disulfide-isomerase A6 OS=Homo sapiens OX=9606 GN=PDIA6 PE=1 SV=1                           | 6                         | 2                       | 2                   | 2                              | 440                | 48.1     | 5.08     | 4.25                          | 2                                   |
| Q15149    | Plectin OS=Homo sapiens OX=9606 GN=PLEC PE=1 SV=3                                                   | 6                         | 23                      | 42                  | 23                             | 4684               | 531.5    | 5.96     | 96.88                         | 23                                  |
| Q15293    | Reticulocalbin-1 OS=Homo sapiens OX=9606 GN=RCN1 PE=1 SV=1                                          | 13                        | 3                       | 7                   | 3                              | 331                | 38.9     | 5        | 19.51                         | 3                                   |
| Q15582    | Transforming growth factor-beta-induced protein ig-h3 OS=Homo sapiens OX=9606 GN=TGFB1 PE=1 SV=1    | 49                        | 20                      | 85                  | 20                             | 683                | 74.6     | 7.71     | 261.38                        | 20                                  |
| Q15828    | Cystatin-M OS=Homo sapiens OX=9606 GN=CST6 PE=1 SV=1                                                | 14                        | 1                       | 2                   | 1                              | 149                | 16.5     | 8.09     | 6.77                          | 1                                   |
| Q16270    | Insulin-like growth factor-binding protein 7 OS=Homo sapiens OX=9606 GN=IGFBP7 PE=1 SV=1            | 47                        | 11                      | 86                  | 11                             | 282                | 29.1     | 7.9      | 266.28                        | 11                                  |
| Q16394    | Exostosin-1 OS=Homo sapiens OX=9606 GN=EXT1 PE=1 SV=2                                               | 7                         | 4                       | 5                   | 4                              | 746                | 86.2     | 9.04     | 11.89                         | 4                                   |
| Q16658    | Fascin OS=Homo sapiens OX=9606 GN=FSCN1 PE=1 SV=3                                                   | 5                         | 2                       | 5                   | 2                              | 493                | 54.5     | 7.24     | 17.72                         | 2                                   |
| Q16706    | Alpha-mannosidase 2 OS=Homo sapiens OX=9606 GN=MAN2A1 PE=1 SV=2                                     | 1                         | 1                       | 1                   | 1                              | 1144               | 131.1    | 7.58     | 1.94                          | 1                                   |
| Q16777    | Histone H2A type 2-C OS=Homo sapiens OX=9606 GN=HIST2H2AC PE=1 SV=4                                 | 7                         | 1                       | 1                   | 1                              | 129                | 14       | 10.9     | 2.09                          | 1                                   |
| Q16778    | Histone H2B type 2-E OS=Homo sapiens OX=9606 GN=HIST2H2BE PE=1 SV=3                                 | 12                        | 1                       | 3                   | 1                              | 126                | 13.9     | 10.32    | 8.55                          | 1                                   |
| Q2HIZ0    | Thrombospondin 3 OS=Homo sapiens OX=9606 GN=THBS3 PE=2 SV=1                                         | 7                         | 4                       | 10                  | 4                              | 956                | 104.1    | 4.65     | 26.36                         | 4                                   |
| Q3B7B1    | PENK protein (Fragment) OS=Homo sapiens OX=9606 GN=PENK PE=2 SV=1                                   | 29                        | 3                       | 6                   | 3                              | 189                | 21.5     | 6.77     | 15.63                         | 3                                   |
| Q4ZHG4    | Fibronectin type III domain-containing protein 1 OS=Homo sapiens OX=9606 GN=FNDC1 PE=2 SV=4         | 7                         | 9                       | 13                  | 9                              | 1894               | 205.4    | 9.32     | 30.5                          | 9                                   |
| Q53FA4    | Cysteine-rich, angiogenic inducer, 61 variant (Fragment) OS=Homo sapiens OX=9606 PE=2 SV=1          | 18                        | 4                       | 6                   | 4                              | 381                | 42       | 8.31     | 16.93                         | 4                                   |
| Q53G99    | Beta actin variant (Fragment) OS=Homo sapiens OX=9606 PE=2 SV=1                                     | 56                        | 13                      | 83                  | 1                              | 375                | 41.7     | 5.59     | 254.31                        | 13                                  |
| Q53GN4    | WD repeat domain 1, isoform CRA_a (Fragment) OS=Homo sapiens OX=9606 GN=WDR1 PE=2 SV=1              | 10                        | 3                       | 3                   | 3                              | 606                | 66.1     | 6.65     | 7.65                          | 3                                   |
| Q53GY0    | Plastin 3 variant (Fragment) OS=Homo sapiens OX=9606 PE=2 SV=1                                      | 24                        | 11                      | 19                  | 11                             | 630                | 70.7     | 5.68     | 44.04                         | 11                                  |
| Q53HQ7    | Elongation factor 1-alpha (Fragment) OS=Homo sapiens OX=9606 PE=2 SV=1                              | 16                        | 4                       | 10                  | 4                              | 462                | 50.2     | 8.94     | 28.23                         | 4                                   |
| Q53R94    | Uncharacterized protein RTN4 (Fragment) OS=Homo sapiens OX=9606 GN=RTN4 PE=4 SV=1                   | 7                         | 1                       | 1                   | 1                              | 185                | 19.3     | 4.13     | 1.97                          | 1                                   |

| Accession | Description                                                                                                                     | Coverage [%] <sup>a</sup> | # Peptides <sup>b</sup> | # PSMs <sup>c</sup> | # Unique Peptides <sup>d</sup> | # AAs <sup>e</sup> | MW [kDa] | Calc. pI <sup>f</sup> | Score Sequest HT <sup>g</sup> | # Peptides: Sequest HT <sup>h</sup> |
|-----------|---------------------------------------------------------------------------------------------------------------------------------|---------------------------|-------------------------|---------------------|--------------------------------|--------------------|----------|-----------------------|-------------------------------|-------------------------------------|
| Q53XB4    | Full-length cDNA clone CS0DF032YM23 of Fetal brain of Homo sapiens (human) OS=Homo sapiens OX=9606 GN=RAB1 PE=2 SV=1            | 21                        | 2                       | 4                   | 2                              | 147                | 16.8     | 9.03                  | 11.82                         | 2                                   |
| Q59GA0    | Thy-1 cell surface antigen variant (Fragment) OS=Homo sapiens OX=9606 PE=2 SV=1                                                 | 20                        | 2                       | 5                   | 2                              | 145                | 15.9     | 9                     | 13.4                          | 2                                   |
| Q5JRP2    | Disintegrin and metalloproteinase domain-containing protein 12 (Fragment) OS=Homo sapiens OX=9606 GN=ADAM12 PE=1 SV=1           | 6                         | 1                       | 1                   | 1                              | 278                | 31.1     | 9.11                  | 2.13                          | 1                                   |
| Q5M8T4    | Connective tissue growth factor OS=Homo sapiens OX=9606 GN=CTGF PE=2 SV=1                                                       | 44                        | 11                      | 26                  | 11                             | 349                | 38       | 7.94                  | 63.85                         | 11                                  |
| Q5T7F0    | Neuropilin OS=Homo sapiens OX=9606 GN=NRP1 PE=1 SV=1                                                                            | 5                         | 2                       | 3                   | 2                              | 704                | 79       | 5.86                  | 6.95                          | 2                                   |
| Q5TZP7    | DNA-(apurinic or apyrimidinic site) lyase OS=Homo sapiens OX=9606 GN=APEX1 PE=2 SV=1                                            | 7                         | 2                       | 2                   | 2                              | 318                | 35.5     | 8.12                  | 3.97                          | 2                                   |
| Q5U000    | Cathepsin Z OS=Homo sapiens OX=9606 PE=2 SV=1                                                                                   | 3                         | 1                       | 1                   | 1                              | 303                | 33.8     | 7.11                  | 1.99                          | 1                                   |
| Q5UGI6    | Serine/cysteine proteinase inhibitor clade G member 1 splice variant 2 (Fragment) OS=Homo sapiens OX=9606 GN=SERPING1 PE=2 SV=1 | 20                        | 6                       | 19                  | 6                              | 333                | 37.3     | 8                     | 54.38                         | 6                                   |
| Q63HR1    | Uncharacterized protein DKFZp686P17171 OS=Homo sapiens OX=9606 GN=DKFZp686P17171 PE=2 SV=1                                      | 4                         | 1                       | 1                   | 1                              | 387                | 42.4     | 8.44                  | 2.6                           | 1                                   |
| Q6DEN2    | DPYSL3 protein OS=Homo sapiens OX=9606 GN=DPYSL3 PE=2 SV=1                                                                      | 4                         | 2                       | 2                   | 2                              | 684                | 73.9     | 6.55                  | 4.87                          | 2                                   |
| Q6EMK4    | Vasorin OS=Homo sapiens OX=9606 GN=VASN PE=1 SV=1                                                                               | 14                        | 6                       | 16                  | 6                              | 673                | 71.7     | 7.39                  | 42.33                         | 6                                   |
| Q6FGD7    | Tubulin-specific chaperone A OS=Homo sapiens OX=9606 GN=TBCA PE=2 SV=1                                                          | 10                        | 1                       | 3                   | 1                              | 108                | 12.8     | 5.29                  | 8.24                          | 1                                   |
| Q6FH49    | NNMT protein OS=Homo sapiens OX=9606 GN=NNMT PE=2 SV=1                                                                          | 3                         | 1                       | 1                   | 1                              | 264                | 29.6     | 5.74                  | 1.97                          | 1                                   |
| Q6FHC9    | STC2 protein (Fragment) OS=Homo sapiens OX=9606 GN=STC2 PE=2 SV=1                                                               | 24                        | 3                       | 18                  | 3                              | 302                | 33.2     | 7.3                   | 65.11                         | 3                                   |
| Q6FHE1    | FST protein OS=Homo sapiens OX=9606 GN=FST PE=2 SV=1                                                                            | 9                         | 1                       | 3                   | 1                              | 317                | 34.8     | 7.65                  | 10.48                         | 1                                   |
| Q6FHU2    | Phosphoglycerate mutase (Fragment) OS=Homo sapiens OX=9606 GN=PGAM1 PE=2 SV=1                                                   | 26                        | 3                       | 3                   | 3                              | 254                | 28.8     | 7.18                  | 7.63                          | 3                                   |
| Q6FHU3    | PSME1 protein (Fragment) OS=Homo sapiens OX=9606 GN=PSME1 PE=2 SV=1                                                             | 3                         | 1                       | 1                   | 1                              | 249                | 28.7     | 6.02                  | 1.94                          | 1                                   |
| Q6FHW3    | DF protein OS=Homo sapiens OX=9606 GN=DF PE=2 SV=1                                                                              | 18                        | 2                       | 3                   | 2                              | 228                | 24.4     | 7.24                  | 7.61                          | 2                                   |
| Q6FHZ0    | Malate dehydrogenase OS=Homo sapiens OX=9606 GN=MDH2 PE=2 SV=1                                                                  | 15                        | 3                       | 5                   | 3                              | 338                | 35.5     | 8.68                  | 13.03                         | 3                                   |
| Q6IAW5    | CALU protein OS=Homo sapiens OX=9606 GN=CALU PE=2 SV=1                                                                          | 38                        | 10                      | 28                  | 10                             | 315                | 37.1     | 4.64                  | 75.17                         | 10                                  |
| Q6NUL1    | Exostoses (Multiple) 2 OS=Homo sapiens OX=9606 GN=EXT2 PE=2 SV=1                                                                | 11                        | 5                       | 10                  | 5                              | 718                | 82.1     | 6.55                  | 26.37                         | 5                                   |
| Q6NUR7    | Ezrin OS=Homo sapiens OX=9606 GN=EZR PE=2 SV=1                                                                                  | 9                         | 6                       | 10                  | 3                              | 586                | 69.2     | 6.27                  | 22.1                          | 6                                   |
| Q6NVI1    | MARCKS protein (Fragment) OS=Homo sapiens OX=9606 GN=MARCKS PE=2 SV=1                                                           | 20                        | 1                       | 3                   | 1                              | 157                | 14.9     | 4.79                  | 10.25                         | 1                                   |
| Q6UVK1    | Chondroitin sulfate proteoglycan 4 OS=Homo sapiens OX=9606 GN=CSPG4 PE=1 SV=2                                                   | 3                         | 4                       | 7                   | 4                              | 2322               | 250.4    | 5.47                  | 17.44                         | 4                                   |
| Q6UWH4    | Protein FAM198B OS=Homo sapiens OX=9606 GN=FAM198B PE=2 SV=1                                                                    | 3                         | 1                       | 2                   | 1                              | 519                | 57.5     | 9.7                   | 4.58                          | 1                                   |
| Q6YHK3    | CD109 antigen OS=Homo sapiens OX=9606 GN=CD109 PE=1 SV=2                                                                        | 8                         | 7                       | 12                  | 7                              | 1445               | 161.6    | 5.85                  | 29.22                         | 7                                   |
| Q76LA1    | CSTB protein OS=Homo sapiens OX=9606 GN=CSTB PE=2 SV=1                                                                          | 12                        | 1                       | 2                   | 1                              | 98                 | 11.1     | 7.56                  | 4.05                          | 1                                   |
| Q7Z2W2    | Extracellular sulfatase OS=Homo sapiens OX=9606 GN=DKFZp686F13142 PE=2 SV=1                                                     | 3                         | 2                       | 4                   | 2                              | 871                | 101      | 9.09                  | 10.29                         | 2                                   |

| Accession | Description                                                                                                   | Coverage [%] <sup>a</sup> | # Peptides <sup>b</sup> | # PSMS <sup>c</sup> | # Unique Peptides <sup>d</sup> | # AAs <sup>e</sup> | MW [kDa] | Calc. pI | Score Sequest HT <sup>g</sup> | # Peptides: Sequest HT <sup>h</sup> |
|-----------|---------------------------------------------------------------------------------------------------------------|---------------------------|-------------------------|---------------------|--------------------------------|--------------------|----------|----------|-------------------------------|-------------------------------------|
| Q7Z7M9    | Polypeptide N-acetylgalactosaminyltransferase 5 OS=Homo sapiens OX=9606 GN=GALNT5 PE=1 SV=1                   | 3                         | 2                       | 6                   | 2                              | 940                | 106.2    | 9.47     | 16.76                         | 2                                   |
| Q86SR1    | Polypeptide N-acetylgalactosaminyltransferase 10 OS=Homo sapiens OX=9606 GN=GALNT10 PE=1 SV=2                 | 2                         | 1                       | 1                   | 1                              | 603                | 68.9     | 8.59     | 2.47                          | 1                                   |
| Q86X91    | Inactive tyrosine-protein kinase 7 OS=Homo sapiens OX=9606 GN=PTK7 PE=1 SV=1                                  | 8                         | 3                       | 5                   | 3                              | 459                | 50.4     | 6.65     | 11.57                         | 3                                   |
| Q86Z22    | Epididymis secretory protein Li 297 OS=Homo sapiens OX=9606 GN=HEL-S-297 PE=2 SV=1                            | 8                         | 2                       | 4                   | 2                              | 226                | 23.8     | 9.06     | 12.06                         | 2                                   |
| Q8IUX7    | Adipocyte enhancer-binding protein 1 OS=Homo sapiens OX=9606 GN=AEBP1 PE=1 SV=1                               | 17                        | 13                      | 43                  | 13                             | 1158               | 130.8    | 5.11     | 122.52                        | 13                                  |
| Q8N7G1    | Purine nucleoside phosphorylase OS=Homo sapiens OX=9606 PE=2 SV=1                                             | 12                        | 2                       | 5                   | 2                              | 293                | 32.5     | 7.21     | 12.47                         | 2                                   |
| Q8NBJ4    | Golgi membrane protein 1 OS=Homo sapiens OX=9606 GN=GOLM1 PE=1 SV=1                                           | 3                         | 1                       | 2                   | 1                              | 401                | 45.3     | 4.97     | 5.21                          | 1                                   |
| Q8WUJ3    | Cell migration-inducing and hyaluronan-binding protein OS=Homo sapiens OX=9606 GN=CEMIP PE=1 SV=2             | 3                         | 3                       | 5                   | 3                              | 1361               | 152.9    | 7.85     | 10.95                         | 3                                   |
| Q92520    | Protein FAM3C OS=Homo sapiens OX=9606 GN=FAM3C PE=1 SV=1                                                      | 7                         | 1                       | 3                   | 1                              | 227                | 24.7     | 8.29     | 7.55                          | 1                                   |
| Q92626    | Peroxidasin homolog OS=Homo sapiens OX=9606 GN=PXDN PE=1 SV=2                                                 | 31                        | 27                      | 45                  | 27                             | 1479               | 165.2    | 7.17     | 126.98                        | 27                                  |
| Q969H8    | Myeloid-derived growth factor OS=Homo sapiens OX=9606 GN=MYDGF PE=1 SV=1                                      | 9                         | 1                       | 4                   | 1                              | 173                | 18.8     | 6.68     | 10                            | 1                                   |
| Q96AY3    | Peptidyl-prolyl cis-trans isomerase FKBP10 OS=Homo sapiens OX=9606 GN=FKBP10 PE=1 SV=1                        | 25                        | 11                      | 27                  | 11                             | 582                | 64.2     | 5.62     | 69.5                          | 11                                  |
| Q96CE4    | Stathmin OS=Homo sapiens OX=9606 GN=STMN1 PE=1 SV=1                                                           | 9                         | 1                       | 3                   | 1                              | 149                | 17.3     | 5.97     | 7.87                          | 1                                   |
| Q96HC4    | PDZ and LIM domain protein 5 OS=Homo sapiens OX=9606 GN=PDLM5 PE=1 SV=5                                       | 10                        | 4                       | 5                   | 4                              | 596                | 63.9     | 8.21     | 12.52                         | 4                                   |
| Q99715    | Collagen alpha-1(XII) chain OS=Homo sapiens OX=9606 GN=COL12A1 PE=1 SV=2                                      | 36                        | 70                      | 240                 | 70                             | 3063               | 332.9    | 5.53     | 670.93                        | 70                                  |
| Q99985    | Semaphorin-3C OS=Homo sapiens OX=9606 GN=SEMA3C PE=2 SV=2                                                     | 6                         | 3                       | 3                   | 3                              | 751                | 85.2     | 8.69     | 6.97                          | 3                                   |
| Q9BRK3    | Matrix remodeling-associated protein 8 OS=Homo sapiens OX=9606 GN=MXRA8 PE=1 SV=1                             | 7                         | 3                       | 7                   | 3                              | 442                | 49.1     | 7.23     | 15.62                         | 3                                   |
| Q9BS26    | Endoplasmic reticulum resident protein 44 OS=Homo sapiens OX=9606 GN=ERP44 PE=1 SV=1                          | 6                         | 1                       | 1                   | 1                              | 406                | 46.9     | 5.26     | 2.68                          | 1                                   |
| Q9NS15    | Latent-transforming growth factor beta-binding protein 3 OS=Homo sapiens OX=9606 GN=LTBP3 PE=1 SV=4           | 2                         | 2                       | 2                   | 2                              | 1303               | 139.3    | 6.07     | 4.68                          | 2                                   |
| Q9P1F3    | Costars family protein ABRACL OS=Homo sapiens OX=9606 GN=ABRACL PE=1 SV=1                                     | 20                        | 1                       | 1                   | 1                              | 81                 | 9.1      | 6.29     | 2.63                          | 1                                   |
| Q9UKP4    | A disintegrin and metalloproteinase with thrombospondin motifs 7 OS=Homo sapiens OX=9606 GN=ADAMTS7 PE=1 SV=2 | 2                         | 3                       | 5                   | 3                              | 1686               | 184      | 6.2      | 12.29                         | 3                                   |
| Q9UNN8    | Endothelial protein C receptor OS=Homo sapiens OX=9606 GN=PROCR PE=1 SV=1                                     | 7                         | 1                       | 3                   | 1                              | 238                | 26.7     | 7.18     | 9.2                           | 1                                   |
| Q9Y240    | C-type lectin domain family 11 member A OS=Homo sapiens OX=9606 GN=CLEC11A PE=1 SV=1                          | 12                        | 3                       | 5                   | 3                              | 323                | 35.7     | 5.16     | 13.43                         | 3                                   |
| Q9Y490    | Talin-1 OS=Homo sapiens OX=9606 GN=TLN1 PE=1 SV=3                                                             | 12                        | 19                      | 32                  | 19                             | 2541               | 269.6    | 6.07     | 74.66                         | 19                                  |
| Q9Y4K0    | Lysyl oxidase homolog 2 OS=Homo sapiens OX=9606 GN=LOXL2 PE=1 SV=1                                            | 11                        | 4                       | 8                   | 4                              | 774                | 86.7     | 6.38     | 23.39                         | 4                                   |
| Q9Y646    | Carboxypeptidase Q OS=Homo sapiens OX=9606 GN=CPQ PE=1 SV=1                                                   | 7                         | 3                       | 8                   | 3                              | 472                | 51.9     | 6.18     | 17.04                         | 3                                   |
| Q9Y6C2    | EMILIN-1 OS=Homo sapiens OX=9606 GN=EMILIN1 PE=1 SV=3                                                         | 19                        | 11                      | 16                  | 11                             | 1016               | 106.6    | 5.17     | 42.25                         | 11                                  |
| S4R3N1    | HSPE1-MOB4 readthrough OS=Homo sapiens OX=9606 GN=HSPE1-MOB4 PE=3 SV=1                                        | 5                         | 1                       | 3                   | 1                              | 261                | 29.7     | 6.16     | 8.55                          | 1                                   |

| Accession | Description                                                                                       | Coverage [%] <sup>a</sup> | # Peptides <sup>b</sup> | # PSMs <sup>c</sup> | # Unique Peptides <sup>d</sup> | # AAs <sup>e</sup> | MW [kDa] | Calc. pI <sup>f</sup> | Score Sequest HT <sup>g</sup> | # Peptides: Sequest HT <sup>h</sup> |
|-----------|---------------------------------------------------------------------------------------------------|---------------------------|-------------------------|---------------------|--------------------------------|--------------------|----------|-----------------------|-------------------------------|-------------------------------------|
| V9H1C1    | Gelsolin exon 4 (Fragment) OS=Homo sapiens OX=9606 PE=4 SV=1                                      | 35                        | 2                       | 4                   | 1                              | 69                 | 8        | 5.78                  | 11.76                         | 2                                   |
| V9HW22    | Epididymis luminal protein 33 OS=Homo sapiens OX=9606 GN=HEL-S-72p PE=2 SV=1                      | 20                        | 11                      | 30                  | 9                              | 646                | 70.9     | 5.52                  | 77.46                         | 11                                  |
| V9HW48    | SH3 domain-binding glutamic acid-rich-like protein OS=Homo sapiens OX=9606 GN=HEL-S-115 PE=2 SV=1 | 11                        | 1                       | 1                   | 1                              | 114                | 12.8     | 5.25                  | 1.93                          | 1                                   |
| V9HW74    | Ubiquitin carboxyl-terminal hydrolase OS=Homo sapiens OX=9606 GN=HEL-117 PE=2 SV=1                | 8                         | 1                       | 3                   | 1                              | 223                | 24.8     | 5.48                  | 8.4                           | 1                                   |
| V9HW92    | Epididymis secretory protein Li 112 OS=Homo sapiens OX=9606 GN=HEL-S-112 PE=2 SV=1                | 4                         | 1                       | 1                   | 1                              | 329                | 36       | 7.02                  | 2.12                          | 1                                   |
| V9HW98    | Epididymis luminal protein 2 OS=Homo sapiens OX=9606 GN=HEL2 PE=1 SV=1                            | 35                        | 7                       | 14                  | 6                              | 255                | 29.2     | 4.74                  | 35.53                         | 7                                   |
| V9HWB4    | Epididymis secretory sperm binding protein Li 89n OS=Homo sapiens OX=9606 GN=HEL-S-89n PE=2 SV=1  | 32                        | 15                      | 39                  | 14                             | 654                | 72.3     | 5.16                  | 101.7                         | 15                                  |
| V9HWB8    | Pyruvate kinase OS=Homo sapiens OX=9606 GN=HEL-S-30 PE=1 SV=1                                     | 44                        | 18                      | 51                  | 18                             | 531                | 57.9     | 7.84                  | 136.18                        | 18                                  |
| V9HWC6    | Peptidyl-prolyl cis-trans isomerase OS=Homo sapiens OX=9606 GN=HEL-S-39 PE=2 SV=1                 | 35                        | 6                       | 14                  | 6                              | 208                | 22.7     | 9.32                  | 36.64                         | 6                                   |
| V9HWE8    | Epididymis secretory sperm binding protein Li 47e OS=Homo sapiens OX=9606 GN=HEL-S-47e PE=2 SV=1  | 41                        | 5                       | 12                  | 5                              | 204                | 23.2     | 5.11                  | 32.21                         | 5                                   |
| V9HWE9    | Epididymis secretory protein Li 22 OS=Homo sapiens OX=9606 GN=HEL-S-22 PE=2 SV=1                  | 37                        | 5                       | 8                   | 3                              | 210                | 23.3     | 5.64                  | 18.86                         | 5                                   |
| V9HWF4    | Phosphoglycerate kinase OS=Homo sapiens OX=9606 GN=HEL-S-68p PE=2 SV=1                            | 19                        | 5                       | 9                   | 5                              | 417                | 44.6     | 8.1                   | 24.63                         | 5                                   |
| V9HWI5    | Cofilin 1 (Non-muscle), isoform CRA_b OS=Homo sapiens OX=9606 GN=HEL-S-15 PE=2 SV=1               | 57                        | 7                       | 14                  | 7                              | 166                | 18.5     | 8.09                  | 35.57                         | 7                                   |
| V9HWK1    | Triosephosphate isomerase OS=Homo sapiens OX=9606 GN=HEL-S-49 PE=2 SV=1                           | 50                        | 10                      | 30                  | 10                             | 249                | 26.7     | 6.9                   | 89.05                         | 10                                  |
| V9HWN7    | Fructose-bisphosphate aldolase OS=Homo sapiens OX=9606 GN=HEL-S-87p PE=2 SV=1                     | 38                        | 8                       | 20                  | 7                              | 364                | 39.4     | 8.09                  | 52.69                         | 8                                   |
| V9HWP2    | Epididymis luminal protein 35 OS=Homo sapiens OX=9606 GN=HEL-S-125m PE=2 SV=1                     | 6                         | 4                       | 12                  | 3                              | 803                | 92.4     | 4.84                  | 32.19                         | 4                                   |

<sup>a</sup>Coverage is the percentage of the sequence covered by identifications (PSMs only) from the included searches. <sup>b</sup># Peptides is the number of distinct peptide sequences in the protein. <sup>c</sup># PSMs is number of identified peptide spectrum matches identified from all included searches, including those redundantly identified. <sup>d</sup># Unique peptide is the total number of distinct peptide sequences unique to the protein group. <sup>e</sup>#AAs is length of the protein sequence. <sup>f</sup>Calc pI (isoelectric point) number is theoretically calculated isoelectric point for the protein that is, the pH at which a particular molecule carries no net electrical charge. <sup>g</sup>Score Sequest HT is a protein score calculated by summing the individual scores for each peptide. The higher this score, the higher the individual score of the peptide, allowing for better identification. <sup>h</sup># Peptides: Sequest HT is the number of distinct peptide sequences in the identified protein.

Supplementary Table 1-2: Detailed information on commonly secreted proteins by 3 bone marrow (BM) mesenchymal stem cells (MSCs) under inflammatory condition.

| Accession  | Description                                                                                                                                     | Coverage [%] <sup>a</sup> | # Peptides <sup>b</sup> | # PSMs <sup>c</sup> | # Unique Peptides <sup>d</sup> | # AAs <sup>e</sup> | MW [kDa] | Calc. pI <sup>f</sup> | Score Sequest HT <sup>g</sup> | # Peptides: Sequest HT <sup>h</sup> |
|------------|-------------------------------------------------------------------------------------------------------------------------------------------------|---------------------------|-------------------------|---------------------|--------------------------------|--------------------|----------|-----------------------|-------------------------------|-------------------------------------|
| A0A024QYX3 | RNA binding motif (RNP1, RRM) protein 3, isoform CRA_c OS=Homo sapiens OX=9606 GN=RBM3 PE=4 SV=1                                                | 11                        | 1                       | 2                   | 1                              | 157                | 17.2     | 8.91                  | 5.46                          | 1                                   |
| A0A024QZL1 | Proteoglycan 1, secretory granule, isoform CRA_a OS=Homo sapiens OX=9606 GN=PRG1 PE=4 SV=1                                                      | 17                        | 2                       | 7                   | 2                              | 158                | 17.6     | 4.86                  | 18.9                          | 2                                   |
| A0A024R0A1 | Macrophage colony-stimulating factor 1 OS=Homo sapiens OX=9606 GN=CSF1 PE=4 SV=1                                                                | 11                        | 4                       | 9                   | 4                              | 554                | 60.1     | 5.29                  | 23.73                         | 4                                   |
| A0A024R0P8 | Transforming growth factor, beta 1 (Camurati-Engelmann disease), isoform CRA_a OS=Homo sapiens OX=9606 GN=TGFB1 PE=3 SV=1                       | 3                         | 1                       | 3                   | 1                              | 390                | 44.3     | 8.53                  | 6.09                          | 1                                   |
| A0A024R1N1 | Myosin, heavy polypeptide 9, non-muscle, isoform CRA_a OS=Homo sapiens OX=9606 GN=MYH9 PE=3 SV=1                                                | 9                         | 13                      | 23                  | 13                             | 1960               | 226.4    | 5.6                   | 54.95                         | 13                                  |
| A0A024R1T9 | ATP-citrate synthase OS=Homo sapiens OX=9606 GN=ACLY PE=3 SV=1                                                                                  | 4                         | 3                       | 3                   | 3                              | 1101               | 120.8    | 7.33                  | 6.61                          | 3                                   |
| A0A024R1U8 | Insulin-like growth factor binding protein 4, isoform CRA_a OS=Homo sapiens OX=9606 GN=IGFBP4 PE=4 SV=1                                         | 25                        | 5                       | 38                  | 5                              | 258                | 27.9     | 7.15                  | 117.93                        | 5                                   |
| A0A024R222 | Phosphoserine aminotransferase OS=Homo sapiens OX=9606 GN=PSAT1 PE=3 SV=1                                                                       | 9                         | 3                       | 4                   | 3                              | 370                | 40.4     | 7.66                  | 10.2                          | 3                                   |
| A0A024R2P0 | 40S ribosomal protein SA OS=Homo sapiens OX=9606 GN=RPSA PE=3 SV=1                                                                              | 9                         | 2                       | 4                   | 2                              | 295                | 32.8     | 4.87                  | 9.77                          | 2                                   |
| A0A024R2W4 | Dystroglycan 1 (Dystrophin-associated glycoprotein 1), isoform CRA_a OS=Homo sapiens OX=9606 GN=DAG1 PE=4 SV=1                                  | 6                         | 3                       | 8                   | 3                              | 895                | 97.5     | 8.56                  | 23.29                         | 3                                   |
| A0A024R433 | Insulin-like growth factor binding protein 5, isoform CRA_a OS=Homo sapiens OX=9606 GN=IGFBP5 PE=4 SV=1                                         | 25                        | 5                       | 14                  | 5                              | 272                | 30.6     | 8.21                  | 35.34                         | 5                                   |
| A0A024R462 | Fibronectin 1, isoform CRA_n OS=Homo sapiens OX=9606 GN=FN1 PE=4 SV=1                                                                           | 52                        | 69                      | 924                 | 39                             | 2355               | 259      | 5.73                  | 2884.47                       | 69                                  |
| A0A024R509 | Arylsulfatase A, isoform CRA_a OS=Homo sapiens OX=9606 GN=ARSA PE=4 SV=1                                                                        | 3                         | 1                       | 1                   | 1                              | 509                | 53.8     | 6.07                  | 2.07                          | 1                                   |
| A0A024R5Z7 | Annexin OS=Homo sapiens OX=9606 GN=ANXA2 PE=3 SV=1                                                                                              | 42                        | 13                      | 52                  | 13                             | 339                | 38.6     | 7.75                  | 140.59                        | 13                                  |
| A0A024R6K8 | Tryptophanyl-tRNA synthetase, isoform CRA_a OS=Homo sapiens OX=9606 GN=WARS PE=3 SV=1                                                           | 7                         | 2                       | 3                   | 2                              | 471                | 53.1     | 6.23                  | 6.82                          | 2                                   |
| A0A024R6R4 | Matrix metalloproteinase 2 (Gelatinase A, 72kDa gelatinase, 72kDa type IV collagenase), isoform CRA_a OS=Homo sapiens OX=9606 GN=MMP2 PE=3 SV=1 | 58                        | 25                      | 194                 | 25                             | 660                | 73.8     | 5.47                  | 593.2                         | 25                                  |
| A0A024R8E5 | Collagen, type V, alpha 1, isoform CRA_a OS=Homo sapiens OX=9606 GN=COL5A1 PE=4 SV=1                                                            | 12                        | 12                      | 38                  | 12                             | 1838               | 183.4    | 5.06                  | 105.82                        | 12                                  |
| A0A024R8S5 | Protein disulfide-isomerase OS=Homo sapiens OX=9606 GN=P4HB PE=2 SV=1                                                                           | 25                        | 8                       | 16                  | 8                              | 508                | 57.1     | 4.87                  | 44.7                          | 8                                   |
| A0A024R8V7 | TIMP metalloproteinase inhibitor 2, isoform CRA_b OS=Homo sapiens OX=9606 GN=TIMP2 PE=4 SV=1                                                    | 32                        | 4                       | 22                  | 4                              | 179                | 20.2     | 7.17                  | 65.85                         | 4                                   |
| A0A024R969 | Chitinase 3-like 1 (Cartilage glycoprotein-39), isoform CRA_a OS=Homo sapiens OX=9606 GN=CHI3L1 PE=3 SV=1                                       | 49                        | 13                      | 70                  | 13                             | 383                | 42.6     | 8.46                  | 197.22                        | 13                                  |
| A0A024RA94 | Microfibrillar-associated protein 2, isoform CRA_d OS=Homo sapiens OX=9606 GN=MFAP2 PE=4 SV=1                                                   | 17                        | 2                       | 3                   | 2                              | 183                | 20.8     | 4.97                  | 6.96                          | 2                                   |
| A0A024RAI1 | ARP3 actin-related protein 3 homolog (Yeast), isoform CRA_a OS=Homo sapiens OX=9606 GN=ACTR3 PE=3 SV=1                                          | 14                        | 4                       | 7                   | 4                              | 418                | 47.3     | 5.88                  | 16.8                          | 4                                   |
| A0A024RAK9 | Hyaluronan and proteoglycan link protein 1, isoform CRA_a OS=Homo sapiens OX=9606 GN=HAPLN1 PE=4 SV=1                                           | 9                         | 2                       | 6                   | 2                              | 354                | 40.1     | 7.42                  | 20.18                         | 2                                   |
| A0A024RAM4 | Microtubule-associated protein 1B, isoform CRA_b OS=Homo sapiens OX=9606 GN=MAP1B PE=4 SV=1                                                     | 1                         | 1                       | 1                   | 1                              | 2468               | 270.5    | 4.81                  | 2.28                          | 1                                   |
| A0A024RAQ9 | Chondroitin sulfate proteoglycan 2 (Versican), isoform CRA_b OS=Homo sapiens OX=9606 GN=CSPG2 PE=4 SV=1                                         | 5                         | 12                      | 47                  | 12                             | 3396               | 372.6    | 4.51                  | 128.69                        | 12                                  |
| A0A024RC55 | Milk fat globule-EGF factor 8 protein, isoform CRA_a OS=Homo sapiens OX=9606 GN=MFGE8 PE=4 SV=1                                                 | 40                        | 10                      | 27                  | 1                              | 387                | 43.1     | 8.15                  | 79.01                         | 10                                  |
| A0A024RD80 | Heat shock protein 90kDa alpha (Cytosolic), class B member 1, isoform CRA_a OS=Homo sapiens OX=9606 GN=HSP90AB1 PE=3 SV=1                       | 16                        | 8                       | 15                  | 7                              | 724                | 83.2     | 5.03                  | 35.18                         | 8                                   |

| Accession  | Description                                                                                                             | Coverage [%] <sup>a</sup> | # Peptides <sup>b</sup> | # PSMs <sup>c</sup> | # Unique Peptides <sup>d</sup> | # AAs <sup>e</sup> | MW [kDa] | Calc. pI | Score Sequest HT <sup>g</sup> | # Peptides: Sequest HT <sup>h</sup> |
|------------|-------------------------------------------------------------------------------------------------------------------------|---------------------------|-------------------------|---------------------|--------------------------------|--------------------|----------|----------|-------------------------------|-------------------------------------|
| A0A024RDA4 | C-X-C motif chemokine OS=Homo sapiens OX=9606 GN=CXCL10 PE=3 SV=1                                                       | 27                        | 2                       | 4                   | 2                              | 98                 | 10.9     | 9.86     | 10                            | 2                                   |
| A0A024RDA5 | Multifunctional fusion protein OS=Homo sapiens OX=9606 GN=IL8 PE=3 SV=1                                                 | 16                        | 1                       | 11                  | 1                              | 99                 | 11.1     | 8.84     | 30.71                         | 1                                   |
| A0A024RDW8 | Collagen, type IV, alpha 2, isoform CRA_a OS=Homo sapiens OX=9606 GN=COL4A2 PE=4 SV=1                                   | 29                        | 28                      | 85                  | 28                             | 1712               | 167.4    | 8.66     | 228.2                         | 28                                  |
| A0A087WTA8 | Collagen alpha-2(I) chain OS=Homo sapiens OX=9606 GN=COL1A2 PE=1 SV=1                                                   | 60                        | 43                      | 809                 | 43                             | 1364               | 129.1    | 9.01     | 2579.52                       | 43                                  |
| A0A087WVN4 | Farnesyl pyrophosphate synthase (Fragment) OS=Homo sapiens OX=9606 GN=FDPS PE=1 SV=1                                    | 7                         | 1                       | 1                   | 1                              | 274                | 31.8     | 7.28     | 2.31                          | 1                                   |
| A0A087WXI7 | Integrin beta-like protein 1 OS=Homo sapiens OX=9606 GN=ITGBL1 PE=1 SV=1                                                | 17                        | 5                       | 8                   | 5                              | 401                | 43.7     | 5.27     | 20.19                         | 5                                   |
| A0A087WZ51 | Tumor protein D54 OS=Homo sapiens OX=9606 GN=TPD52L2 PE=1 SV=1                                                          | 13                        | 1                       | 2                   | 1                              | 152                | 16.3     | 4.92     | 4.6                           | 1                                   |
| A0A087X0S5 | Collagen alpha-1(VI) chain OS=Homo sapiens OX=9606 GN=COL6A1 PE=1 SV=1                                                  | 44                        | 26                      | 179                 | 26                             | 1026               | 108.3    | 5.43     | 541.22                        | 26                                  |
| A0A090N8G0 | Glycyl-tRNA synthetase OS=Homo sapiens OX=9606 GN=GARS PE=4 SV=1                                                        | 2                         | 1                       | 3                   | 1                              | 685                | 77.5     | 6.24     | 9.34                          | 1                                   |
| A0A090N8Y2 | Protein disulfide-isomerase A4 OS=Homo sapiens OX=9606 GN=ERP70 PE=2 SV=1                                               | 4                         | 2                       | 4                   | 2                              | 645                | 72.9     | 5.07     | 10.24                         | 2                                   |
| A0A0A0MT01 | Gelsolin OS=Homo sapiens OX=9606 GN=GSN PE=1 SV=1                                                                       | 20                        | 9                       | 21                  | 9                              | 767                | 84.7     | 5.83     | 54.74                         | 9                                   |
| A0A0A0MTS2 | Glucose-6-phosphate isomerase (Fragment) OS=Homo sapiens OX=9606 GN=GPI PE=1 SV=1                                       | 8                         | 3                       | 3                   | 3                              | 573                | 64.8     | 9.04     | 6.54                          | 3                                   |
| A0A0D9SF54 | Spectrin alpha chain, non-erythrocytic 1 OS=Homo sapiens OX=9606 GN=SPTAN1 PE=1 SV=1                                    | 3                         | 4                       | 6                   | 4                              | 2457               | 282.7    | 5.34     | 13.65                         | 4                                   |
| A0A0H3W617 | Stanniocalcin 1 OS=Homo sapiens OX=9606 GN=stc1 PE=2 SV=1                                                               | 8                         | 1                       | 3                   | 1                              | 178                | 20.5     | 8.72     | 7.49                          | 1                                   |
| A0A0S2Z3G9 | Actinin alpha 4 isoform 1 (Fragment) OS=Homo sapiens OX=9606 GN=ACTN4 PE=2 SV=1                                         | 38                        | 26                      | 67                  | 16                             | 911                | 104.8    | 5.44     | 169                           | 26                                  |
| A0A0S2Z3Y1 | Lectin galactoside-binding soluble 3 binding protein isoform 1 (Fragment) OS=Homo sapiens OX=9606 GN=LGALS3BP PE=2 SV=1 | 18                        | 6                       | 17                  | 6                              | 585                | 65.3     | 5.27     | 44.32                         | 6                                   |
| A0A0U1RRM8 | Fermitin family homolog 2 (Fragment) OS=Homo sapiens OX=9606 GN=FERMT2 PE=1 SV=1                                        | 3                         | 1                       | 1                   | 1                              | 545                | 61.9     | 5.81     | 2.32                          | 1                                   |
| A0A140VJI7 | Testicular tissue protein Li 61 OS=Homo sapiens OX=9606 PE=2 SV=1                                                       | 26                        | 9                       | 16                  | 9                              | 540                | 60.6     | 6.71     | 40.26                         | 9                                   |
| A0A140VJZ1 | Ubiquitin carboxyl-terminal hydrolase OS=Homo sapiens OX=9606 PE=2 SV=1                                                 | 2                         | 1                       | 1                   | 1                              | 858                | 95.7     | 5.03     | 2.08                          | 1                                   |
| A0A146E5L3 | Mesenchymal stromal cell-and fibroblast-expressing Linx paralogue OS=Homo sapiens OX=9606 GN=Meflin PE=2 SV=1           | 15                        | 5                       | 20                  | 5                              | 428                | 46       | 5.15     | 53.75                         | 5                                   |
| A0A161I202 | Lactoferrin OS=Homo sapiens OX=9606 GN=LTF PE=2 SV=1                                                                    | 2                         | 1                       | 1                   | 1                              | 711                | 78.3     | 8.18     | 2.06                          | 1                                   |
| A0A172Q3A0 | Fibroblast activation protein (Fragment) OS=Homo sapiens OX=9606 PE=2 SV=1                                              | 2                         | 1                       | 1                   | 1                              | 733                | 84.8     | 6.55     | 2.03                          | 1                                   |
| A0A1B0GTB0 | Renin receptor (Fragment) OS=Homo sapiens OX=9606 GN=ATP6AP2 PE=1 SV=1                                                  | 6                         | 1                       | 1                   | 1                              | 294                | 33       | 6.07     | 1.99                          | 1                                   |
| A0A1B0GU92 | Uncharacterized protein OS=Homo sapiens OX=9606 PE=1 SV=1                                                               | 11                        | 4                       | 8                   | 4                              | 557                | 59.8     | 6.62     | 19.03                         | 4                                   |
| A0A1U9X7H4 | CFB OS=Homo sapiens OX=9606 PE=3 SV=1                                                                                   | 20                        | 10                      | 27                  | 10                             | 764                | 85.5     | 6.96     | 74.55                         | 10                                  |
| A0A2U3TZL5 | CD59 glycoprotein (Fragment) OS=Homo sapiens OX=9606 GN=CD59 PE=4 SV=1                                                  | 10                        | 1                       | 1                   | 1                              | 120                | 13.3     | 6.25     | 3.05                          | 1                                   |
| A0A2Z6ATB6 | Drebrin A OS=Homo sapiens OX=9606 GN=DBN1 PE=2 SV=1                                                                     | 5                         | 2                       | 4                   | 2                              | 695                | 76.3     | 4.51     | 9.68                          | 2                                   |
| A1KY36     | Cell proliferation-inducing protein 41 OS=Homo sapiens OX=9606 PE=2 SV=1                                                | 21                        | 8                       | 21                  | 8                              | 745                | 73.4     | 9.61     | 61.23                         | 8                                   |

| Accession | Description                                                                                                                                                                                         | Coverage [%] <sup>a</sup> | # Peptides <sup>b</sup> | # PSMs <sup>c</sup> | # Unique Peptides <sup>d</sup> | # AAs <sup>e</sup> | MW [kDa] | Calc. pI | Score Sequest HT <sup>g</sup> | # Peptides: Sequest HT <sup>h</sup> |
|-----------|-----------------------------------------------------------------------------------------------------------------------------------------------------------------------------------------------------|---------------------------|-------------------------|---------------------|--------------------------------|--------------------|----------|----------|-------------------------------|-------------------------------------|
| A1L4H1    | Soluble scavenger receptor cysteine-rich domain-containing protein SSC5D OS=Homo sapiens OX=9606 GN=SSC5D PE=1 SV=3                                                                                 | 2                         | 1                       | 2                   | 1                              | 1573               | 165.6    | 6.13     | 4.81                          | 1                                   |
| A4D1W7    | Inhibin, beta A (Activin A, activin AB alpha polypeptide) OS=Homo sapiens OX=9606 GN=INHBA PE=2 SV=1                                                                                                | 33                        | 12                      | 67                  | 12                             | 426                | 47.4     | 8.03     | 203.71                        | 12                                  |
| A4D275    | Actin-related protein 2/3 complex subunit OS=Homo sapiens OX=9606 GN=ARPC1B PE=2 SV=1                                                                                                               | 6                         | 2                       | 4                   | 2                              | 372                | 40.9     | 8.35     | 9.12                          | 2                                   |
| A4D2D2    | Procollagen C-endopeptidase enhancer OS=Homo sapiens OX=9606 GN=PCOLCE PE=4 SV=1                                                                                                                    | 25                        | 7                       | 18                  | 7                              | 449                | 47.9     | 7.43     | 50.29                         | 7                                   |
| A6XMH5    | Beta-2-microglobulin OS=Homo sapiens OX=9606 PE=2 SV=1                                                                                                                                              | 24                        | 1                       | 8                   | 1                              | 92                 | 10.4     | 8.02     | 25.22                         | 1                                   |
| A6XND1    | Insulin-like growth factor binding protein 3 isoform b OS=Homo sapiens OX=9606 GN=IGFBP3 PE=1 SV=1                                                                                                  | 30                        | 5                       | 20                  | 5                              | 263                | 29       | 8.46     | 55.2                          | 5                                   |
| A8K2Q6    | Peptidyl-prolyl cis-trans isomerase OS=Homo sapiens OX=9606 PE=2 SV=1                                                                                                                               | 6                         | 1                       | 2                   | 1                              | 212                | 22.7     | 8.4      | 4.12                          | 1                                   |
| A8K7Q1    | cDNA FLJ77770, highly similar to Homo sapiens nucleobindin 1 (NUCB1), mRNA OS=Homo sapiens OX=9606 PE=2 SV=1                                                                                        | 33                        | 12                      | 39                  | 12                             | 461                | 53.9     | 5.25     | 106.85                        | 12                                  |
| A8KA16    | cDNA FLJ77243, highly similar to Homo sapiens steroid sensitive gene 1 (URB), transcript variant 1, mRNA OS=Homo sapiens OX=9606 PE=2 SV=1                                                          | 17                        | 11                      | 29                  | 11                             | 950                | 108.1    | 9.69     | 71                            | 11                                  |
| A8KAJ3    | cDNA FLJ77823, highly similar to Homo sapiens EGF-containing fibulin-like extracellular matrix protein 1, transcript variant 3, mRNA OS=Homo sapiens OX=9606 PE=2 SV=1                              | 41                        | 14                      | 30                  | 14                             | 493                | 54.6     | 5.14     | 80.77                         | 14                                  |
| A8MU27    | Small ubiquitin-related modifier 3 OS=Homo sapiens OX=9606 GN=SUMO3 PE=1 SV=1                                                                                                                       | 8                         | 1                       | 1                   | 1                              | 147                | 16.9     | 9.67     | 2.05                          | 1                                   |
| B2R4R0    | Histone H4 OS=Homo sapiens OX=9606 GN=HIST1H4H PE=2 SV=1                                                                                                                                            | 21                        | 2                       | 5                   | 2                              | 103                | 11.4     | 11.36    | 13.25                         | 2                                   |
| B2R582    | cDNA, FLJ92374, highly similar to Homo sapiens C-type lectin domain family 3, member B (CLEC3B), mRNA OS=Homo sapiens OX=9606 PE=2 SV=1                                                             | 22                        | 3                       | 8                   | 3                              | 202                | 22.5     | 6.04     | 16.67                         | 3                                   |
| B2R5J8    | C-C motif chemokine OS=Homo sapiens OX=9606 PE=2 SV=1                                                                                                                                               | 12                        | 1                       | 1                   | 1                              | 91                 | 10       | 9.07     | 2.23                          | 1                                   |
| B2R5M9    | cDNA, FLJ92537, highly similar to Homo sapiens procollagen-lysine, 2-oxoglutarate 5-dioxygenase (lysine hydroxylase, Ehlers-Danlos syndrome type VI) (PLOD), mRNA OS=Homo sapiens OX=9606 PE=2 SV=1 | 12                        | 7                       | 9                   | 7                              | 727                | 83.5     | 7.02     | 20.29                         | 7                                   |
| B2R642    | cDNA, FLJ92775, highly similar to Homo sapiens melanoma cell adhesion molecule (MCAM), mRNA OS=Homo sapiens OX=9606 PE=2 SV=1                                                                       | 2                         | 1                       | 3                   | 1                              | 646                | 71.6     | 5.76     | 6.45                          | 1                                   |
| B2R7T8    | cDNA, FLJ93598, highly similar to Homo sapiens capping protein (actin filament) muscle Z-line, beta (CAPZB), mRNA OS=Homo sapiens OX=9606 PE=2 SV=1                                                 | 18                        | 4                       | 6                   | 4                              | 272                | 30.6     | 6        | 13.8                          | 4                                   |
| B2R960    | cDNA, FLJ94230, highly similar to Homo sapiens thioredoxin-like 1 (TXNL1), mRNA OS=Homo sapiens OX=9606 PE=2 SV=1                                                                                   | 5                         | 1                       | 1                   | 1                              | 289                | 32.2     | 4.96     | 2.01                          | 1                                   |
| B2RBS8    | cDNA, FLJ95666, highly similar to Homo sapiens albumin (ALB), mRNA OS=Homo sapiens OX=9606 PE=2 SV=1                                                                                                | 2                         | 2                       | 9                   | 2                              | 609                | 69.3     | 6.28     | 21.9                          | 2                                   |
| B2RCM5    | cDNA, FLJ96160, highly similar to Homo sapiens EGF-containing fibulin-like extracellular matrix protein 2 (EFEMP2), mRNA OS=Homo sapiens OX=9606 PE=2 SV=1                                          | 15                        | 5                       | 11                  | 5                              | 443                | 49.3     | 4.94     | 25.69                         | 5                                   |
| B2RDW0    | cDNA, FLJ96792, highly similar to Homo sapiens calmodulin 2 (phosphorylase kinase, delta) (CALM2), mRNA OS=Homo sapiens OX=9606 PE=2 SV=1                                                           | 21                        | 2                       | 4                   | 2                              | 149                | 16.8     | 4.22     | 9.23                          | 2                                   |
| B3KQT9    | Protein disulfide-isomerase OS=Homo sapiens OX=9606 PE=2 SV=1                                                                                                                                       | 23                        | 8                       | 14                  | 7                              | 480                | 54.1     | 7.21     | 31.05                         | 8                                   |
| B3KY04    | cDNA FLJ46506 fis, clone THYMU3030752, highly similar to BTB/POZ domain-containing protein KCTD12 OS=Homo sapiens OX=9606 PE=2 SV=1                                                                 | 21                        | 5                       | 9                   | 5                              | 325                | 35.7     | 5.64     | 19.45                         | 5                                   |
| B4DDQ2    | Biglycan OS=Homo sapiens OX=9606 PE=2 SV=1                                                                                                                                                          | 51                        | 12                      | 101                 | 12                             | 334                | 37.6     | 7.97     | 321.3                         | 12                                  |
| B4DE78    | cDNA FLJ52141, highly similar to 14-3-3 protein gamma OS=Homo sapiens OX=9606 PE=2 SV=1                                                                                                             | 21                        | 3                       | 6                   | 2                              | 207                | 23.5     | 4.82     | 17.74                         | 3                                   |
| B4DF70    | cDNA FLJ60461, highly similar to Peroxisome oxidin-2 OS=Homo sapiens OX=9606 PE=2 SV=1                                                                                                              | 16                        | 2                       | 4                   | 1                              | 183                | 20.1     | 8.78     | 9.6                           | 2                                   |
| B4DFR2    | cDNA FLJ59194, moderately similar to Dynein light chain 2A, cytoplasmic OS=Homo sapiens OX=9606 PE=2 SV=1                                                                                           | 8                         | 1                       | 1                   | 1                              | 121                | 13.4     | 10.08    | 1.93                          | 1                                   |



| Accession | Description                                                                                                                                                                     | Coverage [%] <sup>a</sup> | # Peptides <sup>b</sup> | # PSMs <sup>c</sup> | # Unique Peptides <sup>d</sup> | # AAs <sup>e</sup> | MW [kDa] | Calc. pI <sup>f</sup> | Score Sequest HT <sup>g</sup> | # Peptides: Sequest HT <sup>h</sup> |
|-----------|---------------------------------------------------------------------------------------------------------------------------------------------------------------------------------|---------------------------|-------------------------|---------------------|--------------------------------|--------------------|----------|-----------------------|-------------------------------|-------------------------------------|
| B4DHK9    | cDNA FLJ51656, highly similar to Actin-like protein 2 OS=Homo sapiens OX=9606 PE=2 SV=1                                                                                         | 17                        | 4                       | 7                   | 4                              | 342                | 39       | 5.91                  | 16.58                         | 4                                   |
| B4DJ30    | cDNA FLJ61290, highly similar to Neutral alpha-glucosidase AB OS=Homo sapiens OX=9606 PE=2 SV=1                                                                                 | 6                         | 4                       | 6                   | 4                              | 995                | 112.9    | 6.06                  | 14.26                         | 4                                   |
| B4DJI4    | cDNA FLJ58065, highly similar to LIM and SH3 domain protein 1 OS=Homo sapiens OX=9606 PE=2 SV=1                                                                                 | 12                        | 2                       | 2                   | 2                              | 220                | 24.5     | 8.54                  | 4.29                          | 2                                   |
| B4DJQ5    | cDNA FLJ59211, highly similar to Glucosidase 2 subunit beta OS=Homo sapiens OX=9606 PE=2 SV=1                                                                                   | 10                        | 4                       | 6                   | 4                              | 535                | 60.1     | 4.42                  | 14.17                         | 4                                   |
| B4DKJ4    | cDNA FLJ57738, highly similar to Translationally-controlled tumor protein OS=Homo sapiens OX=9606 PE=2 SV=1                                                                     | 10                        | 1                       | 2                   | 1                              | 142                | 16.1     | 4.68                  | 6.03                          | 1                                   |
| B4DKZ9    | cDNA FLJ55705, highly similar to Threonyl-tRNA synthetase, cytoplasmic OS=Homo sapiens OX=9606 PE=2 SV=1                                                                        | 2                         | 1                       | 1                   | 1                              | 602                | 70.3     | 8.56                  | 2.09                          | 1                                   |
| B4DLV7    | Rab GDP dissociation inhibitor OS=Homo sapiens OX=9606 PE=2 SV=1                                                                                                                | 27                        | 8                       | 10                  | 5                              | 449                | 51.1     | 8.18                  | 23.82                         | 8                                   |
| B4DM79    | cDNA FLJ53848, highly similar to Inter-alpha-trypsin inhibitor heavy chain H2 OS=Homo sapiens OX=9606 PE=2 SV=1                                                                 | 5                         | 2                       | 4                   | 2                              | 543                | 60.7     | 5.35                  | 9.34                          | 2                                   |
| B4DMR3    | cDNA FLJ51896, highly similar to Glia-derived nexin OS=Homo sapiens OX=9606 PE=2 SV=1                                                                                           | 49                        | 14                      | 104                 | 14                             | 334                | 37.1     | 9.52                  | 273.65                        | 14                                  |
| B4DN59    | cDNA FLJ52702, highly similar to Homo sapiens CD44 antigen (homing function and Indian blood group system) (CD44), transcript variant 4, mRNA OS=Homo sapiens OX=9606 PE=2 SV=1 | 12                        | 3                       | 5                   | 3                              | 329                | 36       | 5.9                   | 11.76                         | 3                                   |
| B4DNG0    | cDNA FLJ58142, highly similar to Olfactomedin-like protein 3 OS=Homo sapiens OX=9606 GN=OLFML3 PE=1 SV=1                                                                        | 23                        | 5                       | 13                  | 5                              | 345                | 39       | 6.11                  | 31.76                         | 5                                   |
| B4DPQ0    | Complement C1r subcomponent OS=Homo sapiens OX=9606 GN=C1R PE=1 SV=1                                                                                                            | 41                        | 18                      | 100                 | 18                             | 719                | 81.8     | 6.37                  | 315.2                         | 18                                  |
| B4DPZ5    | cDNA FLJ53495, highly similar to Polymerase I and transcript release factor OS=Homo sapiens OX=9606 PE=2 SV=1                                                                   | 8                         | 2                       | 5                   | 2                              | 363                | 40.5     | 5.25                  | 11.93                         | 2                                   |
| B4DRT4    | cDNA FLJ51535, highly similar to Phosphatidylethanolamine-binding protein 1 OS=Homo sapiens OX=9606 PE=2 SV=1                                                                   | 23                        | 2                       | 7                   | 2                              | 155                | 17.3     | 6                     | 19.88                         | 2                                   |
| B4DRV4    | cDNA FLJ55667, highly similar to Secreted protein acidic and rich in cysteine OS=Homo sapiens OX=9606 PE=2 SV=1                                                                 | 70                        | 12                      | 157                 | 1                              | 212                | 24.7     | 5.62                  | 436.15                        | 12                                  |
| B4DU16    | cDNA FLJ54550, highly similar to Homo sapiens fibronectin 1 (FN1), transcript variant 6, mRNA OS=Homo sapiens OX=9606 PE=2 SV=1                                                 | 61                        | 31                      | 443                 | 1                              | 894                | 98.1     | 6.24                  | 1410.81                       | 31                                  |
| B4DUQ1    | cDNA FLJ54552, highly similar to Heterogeneous nuclear ribonucleoprotein K OS=Homo sapiens OX=9606 PE=2 SV=1                                                                    | 16                        | 5                       | 11                  | 5                              | 439                | 48.5     | 5.92                  | 28.68                         | 5                                   |
| B4DUV1    | Fibulin-1 OS=Homo sapiens OX=9606 PE=2 SV=1                                                                                                                                     | 41                        | 15                      | 48                  | 3                              | 641                | 70.1     | 5.26                  | 136.96                        | 15                                  |
| B4DWC4    | Chloride intracellular channel protein OS=Homo sapiens OX=9606 PE=2 SV=1                                                                                                        | 35                        | 6                       | 14                  | 6                              | 245                | 27.8     | 6.38                  | 33.94                         | 6                                   |
| B4E324    | cDNA FLJ60397, highly similar to Lysosomal protective protein OS=Homo sapiens OX=9606 PE=2 SV=1                                                                                 | 3                         | 1                       | 3                   | 1                              | 480                | 54.2     | 6.98                  | 8                             | 1                                   |
| B4E3Q1    | cDNA FLJ61580, highly similar to Calsyntenin-1 OS=Homo sapiens OX=9606 PE=2 SV=1                                                                                                | 14                        | 9                       | 29                  | 9                              | 962                | 107.7    | 4.97                  | 81.38                         | 9                                   |
| B5MCZ3    | Interleukin-6 OS=Homo sapiens OX=9606 GN=IL6 PE=1 SV=1                                                                                                                          | 38                        | 6                       | 30                  | 6                              | 189                | 21.5     | 6.57                  | 85.17                         | 6                                   |
| B7Z114    | cDNA FLJ57258, highly similar to Neurotrimin OS=Homo sapiens OX=9606 PE=2 SV=1                                                                                                  | 6                         | 1                       | 1                   | 1                              | 346                | 38.2     | 8.54                  | 2.25                          | 1                                   |
| B7Z230    | Peptidylprolyl isomerase OS=Homo sapiens OX=9606 PE=2 SV=1                                                                                                                      | 2                         | 1                       | 1                   | 1                              | 432                | 47.8     | 4.91                  | 1.9                           | 1                                   |
| C9IZP8    | Complement C1s subcomponent (Fragment) OS=Homo sapiens OX=9606 GN=C1S PE=1 SV=1                                                                                                 | 17                        | 1                       | 3                   | 1                              | 103                | 11.8     | 4.2                   | 9.53                          | 1                                   |
| C9JPM3    | Disintegrin and metalloproteinase domain-containing protein 9 OS=Homo sapiens OX=9606 GN=ADAM9 PE=1 SV=1                                                                        | 11                        | 1                       | 1                   | 1                              | 147                | 16.8     | 8.95                  | 2.62                          | 1                                   |
| D0PNI1    | Epididymis luminal protein 4 OS=Homo sapiens OX=9606 GN=YWHAZ PE=2 SV=1                                                                                                         | 36                        | 7                       | 18                  | 6                              | 245                | 27.7     | 4.79                  | 48.59                         | 7                                   |
| D0PNI2    | Lysyl oxidase OS=Homo sapiens OX=9606 GN=LOX PE=4 SV=1                                                                                                                          | 24                        | 6                       | 11                  | 6                              | 417                | 46.9     | 8.09                  | 30.06                         | 6                                   |

| Accession | Description                                                                                        | Coverage [%] <sup>a</sup> | # Peptides <sup>b</sup> | # PSMs <sup>c</sup> | # Unique Peptides <sup>d</sup> | # AAs <sup>e</sup> | MW [kDa] | Calc. pI | Score Sequest HT <sup>g</sup> | # Peptides: Sequest HT <sup>h</sup> |
|-----------|----------------------------------------------------------------------------------------------------|---------------------------|-------------------------|---------------------|--------------------------------|--------------------|----------|----------|-------------------------------|-------------------------------------|
| D1MGQ2    | Alpha-2 globin chain OS=Homo sapiens OX=9606 GN=HBA2 PE=3 SV=1                                     | 11                        | 1                       | 1                   | 1                              | 142                | 15.2     | 8.68     | 3.16                          | 1                                   |
| D3DT71    | Collagen, type XI, alpha 1, isoform CRA_b OS=Homo sapiens OX=9606 GN=COL11A1 PE=4 SV=1             | 2                         | 2                       | 5                   | 2                              | 1767               | 176.5    | 5.38     | 13.82                         | 2                                   |
| D3DTX7    | Collagen, type I, alpha 1, isoform CRA_a OS=Homo sapiens OX=9606 GN=COL1A1 PE=4 SV=1               | 67                        | 33                      | 344                 | 2                              | 885                | 84.7     | 6.24     | 1085.9                        | 33                                  |
| D3YTG3    | Target of Nesh-SH3 OS=Homo sapiens OX=9606 GN=ABI3BP PE=1 SV=1                                     | 5                         | 6                       | 15                  | 6                              | 1777               | 195.2    | 9.73     | 40.29                         | 6                                   |
| D6RF35    | Vitamin D-binding protein OS=Homo sapiens OX=9606 GN=GC PE=1 SV=1                                  | 5                         | 1                       | 1                   | 1                              | 476                | 53       | 5.52     | 2.75                          | 1                                   |
| D6RF92    | C-X-C motif chemokine OS=Homo sapiens OX=9606 GN=CXCL6 PE=1 SV=1                                   | 29                        | 4                       | 16                  | 4                              | 113                | 11.9     | 9.76     | 38.25                         | 4                                   |
| D9ZGF2    | Collagen, type VI, alpha 3 OS=Homo sapiens OX=9606 GN=COL6A3 PE=4 SV=1                             | 25                        | 54                      | 141                 | 54                             | 3177               | 343.5    | 6.68     | 356.17                        | 54                                  |
| E7ETU9    | Procollagen-lysine,2-oxoglutarate 5-dioxygenase 2 OS=Homo sapiens OX=9606 GN=PLOD2 PE=1 SV=1       | 6                         | 3                       | 5                   | 3                              | 703                | 81.1     | 6.65     | 10.65                         | 3                                   |
| E9PL57    | NEDD8-MDP1 readthrough (Fragment) OS=Homo sapiens OX=9606 GN=NEDD8-MDP1 PE=4 SV=1                  | 8                         | 1                       | 1                   | 1                              | 170                | 19.5     | 7.43     | 1.96                          | 1                                   |
| E9PRJ8    | Tetraspanin (Fragment) OS=Homo sapiens OX=9606 GN=CD81 PE=1 SV=1                                   | 28                        | 3                       | 4                   | 3                              | 209                | 22.5     | 6.15     | 10.88                         | 3                                   |
| F2Z393    | Transaldolase OS=Homo sapiens OX=9606 GN=TALDO1 PE=1 SV=1                                          | 8                         | 2                       | 2                   | 2                              | 318                | 35.3     | 8.97     | 4.66                          | 2                                   |
| F5GZS6    | 4F2 cell-surface antigen heavy chain OS=Homo sapiens OX=9606 GN=SLC3A2 PE=1 SV=1                   | 2                         | 1                       | 1                   | 1                              | 599                | 64.8     | 5.1      | 1.92                          | 1                                   |
| F5H5D3    | Tubulin alpha chain OS=Homo sapiens OX=9606 GN=TUBA1C PE=1 SV=1                                    | 21                        | 7                       | 18                  | 7                              | 519                | 57.7     | 5.07     | 46.79                         | 7                                   |
| F6RFD5    | Destrin OS=Homo sapiens OX=9606 GN=DSTN PE=1 SV=1                                                  | 18                        | 2                       | 4                   | 2                              | 135                | 15.4     | 8.59     | 10.24                         | 2                                   |
| F8W6I7    | Heterogeneous nuclear ribonucleoprotein A1 OS=Homo sapiens OX=9606 GN=HNRNPA1 PE=1 SV=2            | 19                        | 4                       | 12                  | 4                              | 307                | 33.1     | 9.13     | 28.51                         | 4                                   |
| F8W809    | Thioredoxin reductase 1, cytoplasmic OS=Homo sapiens OX=9606 GN=TXNRD1 PE=1 SV=1                   | 6                         | 2                       | 3                   | 2                              | 498                | 54.6     | 6.47     | 7.15                          | 2                                   |
| G3V279    | Enhancer of rudimentary homolog OS=Homo sapiens OX=9606 GN=ERH PE=1 SV=1                           | 17                        | 1                       | 1                   | 1                              | 71                 | 8.2      | 4.7      | 2.09                          | 1                                   |
| G3V3E8    | NPC intracellular cholesterol transporter 2 OS=Homo sapiens OX=9606 GN=NPC2 PE=1 SV=1              | 28                        | 3                       | 9                   | 3                              | 174                | 19.2     | 8.44     | 23.6                          | 3                                   |
| H0UI49    | Laminin, alpha 4, isoform CRA_b OS=Homo sapiens OX=9606 GN=LAMA4 PE=4 SV=1                         | 19                        | 21                      | 44                  | 21                             | 1816               | 201.7    | 6.3      | 109.38                        | 21                                  |
| H0YGS3    | Microfibrillar-associated protein 5 (Fragment) OS=Homo sapiens OX=9606 GN=MFAP5 PE=1 SV=1          | 34                        | 2                       | 8                   | 2                              | 79                 | 9.4      | 9.47     | 21.68                         | 2                                   |
| H3BT71    | RNA-binding motif protein, X chromosome OS=Homo sapiens OX=9606 GN=RBMX PE=1 SV=1                  | 9                         | 2                       | 2                   | 2                              | 296                | 32.2     | 9.91     | 4.5                           | 2                                   |
| H6VRF8    | Keratin 1 OS=Homo sapiens OX=9606 GN=KRT1 PE=3 SV=1                                                | 15                        | 8                       | 14                  | 8                              | 644                | 66       | 8.12     | 32.02                         | 8                                   |
| H7BZJ3    | Protein disulfide-isomerase A3 (Fragment) OS=Homo sapiens OX=9606 GN=PDIA3 PE=1 SV=1               | 20                        | 2                       | 4                   | 1                              | 123                | 13.5     | 7.3      | 8.7                           | 2                                   |
| H7C0V9    | Amyloid-beta A4 protein (Fragment) OS=Homo sapiens OX=9606 GN=APP PE=1 SV=1                        | 4                         | 1                       | 1                   | 1                              | 485                | 55.1     | 4.82     | 3.35                          | 1                                   |
| H7C557    | Multiple epidermal growth factor-like domains protein 6 OS=Homo sapiens OX=9606 GN=MEGF6 PE=1 SV=2 | 1                         | 1                       | 3                   | 1                              | 1323               | 138.3    | 6.62     | 8.84                          | 1                                   |
| I3L297    | Adapter molecule crk OS=Homo sapiens OX=9606 GN=CRK PE=1 SV=1                                      | 5                         | 1                       | 2                   | 1                              | 223                | 25.5     | 7.56     | 3.99                          | 1                                   |
| I4AY87    | Macrophage migration inhibitory factor (Fragment) OS=Homo sapiens OX=9606 GN=MIF PE=1 SV=1         | 18                        | 2                       | 4                   | 2                              | 115                | 12.5     | 7.88     | 9.04                          | 2                                   |
| K4RH61    | Matrix metalloproteinase 14 (Membrane-inserted) OS=Homo sapiens OX=9606 GN=MMP14 PE=2 SV=1         | 2                         | 1                       | 3                   | 1                              | 582                | 65.9     | 7.97     | 7.14                          | 1                                   |

| Accession | Description                                                                                                   | Coverage [%] <sup>a</sup> | # Peptides <sup>b</sup> | # PSMs <sup>c</sup> | # Unique Peptides <sup>d</sup> | # AAs <sup>e</sup> | MW [kDa] | Calc. pI | Score Sequest HT <sup>g</sup> | # Peptides: Sequest HT <sup>h</sup> |
|-----------|---------------------------------------------------------------------------------------------------------------|---------------------------|-------------------------|---------------------|--------------------------------|--------------------|----------|----------|-------------------------------|-------------------------------------|
| K7ENT6    | Tropomyosin alpha-4 chain OS=Homo sapiens OX=9606 GN=TPM4 PE=1 SV=2                                           | 26                        | 7                       | 33                  | 1                              | 247                | 28.5     | 4.63     | 85.63                         | 7                                   |
| K7EQA1    | Programmed cell death protein 5 OS=Homo sapiens OX=9606 GN=PDCD5 PE=1 SV=1                                    | 15                        | 1                       | 2                   | 1                              | 87                 | 10       | 9        | 4.41                          | 1                                   |
| M0R0Y4    | Urokinase plasminogen activator surface receptor (Fragment) OS=Homo sapiens OX=9606 GN=PLAUR PE=1 SV=1        | 6                         | 1                       | 1                   | 1                              | 185                | 20.7     | 6.6      | 2.31                          | 1                                   |
| M0R261    | 6-phosphogluconolactonase (Fragment) OS=Homo sapiens OX=9606 GN=PGLS PE=1 SV=1                                | 6                         | 1                       | 1                   | 1                              | 216                | 23       | 5.86     | 2.08                          | 1                                   |
| M1VE83    | Tyrosine-protein kinase receptor OS=Homo sapiens OX=9606 GN=SDC4-ROS1_S4;R34 PE=2 SV=1                        | 4                         | 2                       | 3                   | 2                              | 643                | 71.6     | 4.81     | 7.05                          | 2                                   |
| O00300    | Tumor necrosis factor receptor superfamily member 11B OS=Homo sapiens OX=9606 GN=TNFRSF11B PE=1 SV=3          | 14                        | 4                       | 16                  | 4                              | 401                | 46       | 8.29     | 41.7                          | 4                                   |
| O00391    | Sulfhydryl oxidase 1 OS=Homo sapiens OX=9606 GN=QSOX1 PE=1 SV=3                                               | 42                        | 22                      | 101                 | 22                             | 747                | 82.5     | 8.92     | 320.09                        | 22                                  |
| O14907    | Tax1-binding protein 3 OS=Homo sapiens OX=9606 GN=TAX1BP3 PE=1 SV=2                                           | 28                        | 2                       | 4                   | 2                              | 124                | 13.7     | 8.48     | 8.95                          | 2                                   |
| O14950    | Myosin regulatory light chain 12B OS=Homo sapiens OX=9606 GN=MYL12B PE=1 SV=2                                 | 34                        | 5                       | 10                  | 2                              | 172                | 19.8     | 4.84     | 23.11                         | 5                                   |
| O15511    | Actin-related protein 2/3 complex subunit 5 OS=Homo sapiens OX=9606 GN=ARPC5 PE=1 SV=3                        | 8                         | 1                       | 3                   | 1                              | 151                | 16.3     | 5.67     | 6.52                          | 1                                   |
| O43854    | EGF-like repeat and discoidin I-like domain-containing protein 3 OS=Homo sapiens OX=9606 GN=EDIL3 PE=1 SV=1   | 17                        | 5                       | 9                   | 5                              | 480                | 53.7     | 7.28     | 20.14                         | 5                                   |
| O60568    | Procollagen-lysine,2-oxoglutarate 5-dioxygenase 3 OS=Homo sapiens OX=9606 GN=PLOD3 PE=1 SV=1                  | 6                         | 3                       | 5                   | 3                              | 738                | 84.7     | 6.05     | 11.43                         | 3                                   |
| O60664    | Perilipin-3 OS=Homo sapiens OX=9606 GN=PLIN3 PE=1 SV=3                                                        | 17                        | 5                       | 7                   | 5                              | 434                | 47       | 5.44     | 15.76                         | 5                                   |
| O95450    | A disintegrin and metalloproteinase with thrombospondin motifs 2 OS=Homo sapiens OX=9606 GN=ADAMTS2 PE=2 SV=2 | 1                         | 1                       | 1                   | 1                              | 1211               | 134.7    | 7.15     | 2.32                          | 1                                   |
| P00338    | L-lactate dehydrogenase A chain OS=Homo sapiens OX=9606 GN=LDHA PE=1 SV=2                                     | 20                        | 5                       | 17                  | 5                              | 332                | 36.7     | 8.27     | 42.29                         | 5                                   |
| P00441    | Superoxide dismutase [Cu-Zn] OS=Homo sapiens OX=9606 GN=SOD1 PE=1 SV=2                                        | 25                        | 2                       | 4                   | 2                              | 154                | 15.9     | 6.13     | 10.38                         | 2                                   |
| P01024    | Complement C3 OS=Homo sapiens OX=9606 GN=C3 PE=1 SV=2                                                         | 38                        | 45                      | 144                 | 45                             | 1663               | 187      | 6.4      | 392.5                         | 45                                  |
| P01033    | Metalloproteinase inhibitor 1 OS=Homo sapiens OX=9606 GN=TIMP1 PE=1 SV=1                                      | 54                        | 7                       | 103                 | 7                              | 207                | 23.2     | 8.1      | 350.42                        | 7                                   |
| P01034    | Cystatin-C OS=Homo sapiens OX=9606 GN=CST3 PE=1 SV=1                                                          | 42                        | 5                       | 15                  | 5                              | 146                | 15.8     | 8.75     | 40.11                         | 5                                   |
| P02452    | Collagen alpha-1(I) chain OS=Homo sapiens OX=9606 GN=COL1A1 PE=1 SV=5                                         | 55                        | 43                      | 417                 | 12                             | 1464               | 138.9    | 5.8      | 1306.75                       | 43                                  |
| P02461    | Collagen alpha-1(III) chain OS=Homo sapiens OX=9606 GN=COL3A1 PE=1 SV=4                                       | 33                        | 25                      | 126                 | 25                             | 1466               | 138.5    | 6.61     | 379.31                        | 25                                  |
| P02462    | Collagen alpha-1(IV) chain OS=Homo sapiens OX=9606 GN=COL4A1 PE=1 SV=4                                        | 8                         | 6                       | 23                  | 6                              | 1669               | 160.5    | 8.28     | 63.93                         | 6                                   |
| P02545    | Prelamin-A/C OS=Homo sapiens OX=9606 GN=LMNA PE=1 SV=1                                                        | 28                        | 14                      | 32                  | 14                             | 664                | 74.1     | 7.02     | 82.11                         | 14                                  |
| P04083    | Annexin A1 OS=Homo sapiens OX=9606 GN=ANXA1 PE=1 SV=2                                                         | 33                        | 9                       | 22                  | 9                              | 346                | 38.7     | 7.02     | 54.48                         | 9                                   |
| P04632    | Calpain small subunit 1 OS=Homo sapiens OX=9606 GN=CAPNS1 PE=1 SV=1                                           | 5                         | 1                       | 3                   | 1                              | 268                | 28.3     | 5.2      | 6.74                          | 1                                   |
| P04792    | Heat shock protein beta-1 OS=Homo sapiens OX=9606 GN=HSPB1 PE=1 SV=2                                          | 23                        | 2                       | 5                   | 2                              | 205                | 22.8     | 6.4      | 13.37                         | 2                                   |
| P05120    | Plasminogen activator inhibitor 2 OS=Homo sapiens OX=9606 GN=SERPINB2 PE=1 SV=2                               | 7                         | 2                       | 2                   | 2                              | 415                | 46.6     | 5.63     | 4.58                          | 2                                   |
| P05387    | 60S acidic ribosomal protein P2 OS=Homo sapiens OX=9606 GN=RPLP2 PE=1 SV=1                                    | 14                        | 2                       | 2                   | 2                              | 115                | 11.7     | 4.54     | 4.47                          | 2                                   |

| Accession | Description                                                                              | Coverage [%] <sup>a</sup> | # Peptides <sup>b</sup> | # PSMs <sup>c</sup> | # Unique Peptides <sup>d</sup> | # AAs <sup>e</sup> | MW [kDa] | Calc. pI | Score Sequest HT <sup>g</sup> | # Peptides: Sequest HT <sup>h</sup> |
|-----------|------------------------------------------------------------------------------------------|---------------------------|-------------------------|---------------------|--------------------------------|--------------------|----------|----------|-------------------------------|-------------------------------------|
| P05997    | Collagen alpha-2(V) chain OS=Homo sapiens OX=9606 GN=COL5A2 PE=1 SV=3                    | 32                        | 24                      | 73                  | 24                             | 1499               | 144.8    | 6.46     | 213.93                        | 24                                  |
| P07195    | L-lactate dehydrogenase B chain OS=Homo sapiens OX=9606 GN=LDHB PE=1 SV=2                | 18                        | 5                       | 7                   | 5                              | 334                | 36.6     | 6.05     | 16.11                         | 5                                   |
| P07437    | Tubulin beta chain OS=Homo sapiens OX=9606 GN=TUBB PE=1 SV=2                             | 30                        | 8                       | 16                  | 8                              | 444                | 49.6     | 4.89     | 41.98                         | 8                                   |
| P07585    | Decorin OS=Homo sapiens OX=9606 GN=DCN PE=1 SV=1                                         | 36                        | 10                      | 88                  | 10                             | 359                | 39.7     | 8.54     | 248.76                        | 10                                  |
| P07737    | Profilin-1 OS=Homo sapiens OX=9606 GN=PFN1 PE=1 SV=2                                     | 59                        | 5                       | 18                  | 5                              | 140                | 15       | 8.27     | 48.69                         | 5                                   |
| P07942    | Laminin subunit beta-1 OS=Homo sapiens OX=9606 GN=LAMB1 PE=1 SV=2                        | 17                        | 21                      | 38                  | 21                             | 1786               | 197.9    | 4.94     | 89.95                         | 21                                  |
| P07996    | Thrombospondin-1 OS=Homo sapiens OX=9606 GN=THBS1 PE=1 SV=2                              | 39                        | 31                      | 125                 | 29                             | 1170               | 129.3    | 4.94     | 352.2                         | 31                                  |
| P08254    | Stromelysin-1 OS=Homo sapiens OX=9606 GN=MMP3 PE=1 SV=2                                  | 14                        | 6                       | 19                  | 6                              | 477                | 53.9     | 6.16     | 46.93                         | 6                                   |
| P08670    | Vimentin OS=Homo sapiens OX=9606 GN=VIM PE=1 SV=4                                        | 49                        | 23                      | 109                 | 23                             | 466                | 53.6     | 5.12     | 298.9                         | 23                                  |
| P08758    | Annexin A5 OS=Homo sapiens OX=9606 GN=ANXA5 PE=1 SV=2                                    | 14                        | 4                       | 5                   | 4                              | 320                | 35.9     | 5.05     | 10.72                         | 4                                   |
| P09341    | Growth-regulated alpha protein OS=Homo sapiens OX=9606 GN=CXCL1 PE=1 SV=1                | 37                        | 3                       | 36                  | 2                              | 107                | 11.3     | 10.43    | 122.72                        | 3                                   |
| P09382    | Galectin-1 OS=Homo sapiens OX=9606 GN=LGALS1 PE=1 SV=2                                   | 65                        | 5                       | 26                  | 5                              | 135                | 14.7     | 5.5      | 73.82                         | 5                                   |
| P09486    | SPARC OS=Homo sapiens OX=9606 GN=SPARC PE=1 SV=1                                         | 56                        | 13                      | 195                 | 2                              | 303                | 34.6     | 4.84     | 551.28                        | 13                                  |
| P09871    | Complement C1s subcomponent OS=Homo sapiens OX=9606 GN=C1S PE=1 SV=1                     | 36                        | 16                      | 65                  | 16                             | 688                | 76.6     | 4.96     | 190.03                        | 16                                  |
| P10599    | Thioredoxin OS=Homo sapiens OX=9606 GN=TXN PE=1 SV=3                                     | 12                        | 1                       | 5                   | 1                              | 105                | 11.7     | 4.92     | 12.69                         | 1                                   |
| P10909    | Clusterin OS=Homo sapiens OX=9606 GN=CLU PE=1 SV=1                                       | 22                        | 7                       | 21                  | 7                              | 449                | 52.5     | 6.27     | 53.88                         | 7                                   |
| P11047    | Laminin subunit gamma-1 OS=Homo sapiens OX=9606 GN=LAMC1 PE=1 SV=3                       | 19                        | 20                      | 50                  | 20                             | 1609               | 177.5    | 5.12     | 138.63                        | 20                                  |
| P12110    | Collagen alpha-2(VI) chain OS=Homo sapiens OX=9606 GN=COL6A2 PE=1 SV=4                   | 23                        | 14                      | 45                  | 2                              | 1019               | 108.5    | 6.21     | 126.68                        | 14                                  |
| P13497    | Bone morphogenetic protein 1 OS=Homo sapiens OX=9606 GN=BMP1 PE=1 SV=2                   | 8                         | 6                       | 14                  | 6                              | 986                | 111.2    | 6.9      | 33.68                         | 6                                   |
| P13500    | C-C motif chemokine 2 OS=Homo sapiens OX=9606 GN=CCL2 PE=1 SV=1                          | 11                        | 1                       | 8                   | 1                              | 99                 | 11       | 9.25     | 18.95                         | 1                                   |
| P13639    | Elongation factor 2 OS=Homo sapiens OX=9606 GN=EEF2 PE=1 SV=4                            | 12                        | 7                       | 15                  | 7                              | 858                | 95.3     | 6.83     | 36.42                         | 7                                   |
| P14543    | Nidogen-1 OS=Homo sapiens OX=9606 GN=NID1 PE=1 SV=3                                      | 13                        | 12                      | 27                  | 11                             | 1247               | 136.3    | 5.29     | 68.38                         | 12                                  |
| P14550    | Alcohol dehydrogenase [NADP(+)] OS=Homo sapiens OX=9606 GN=AKR1A1 PE=1 SV=3              | 5                         | 1                       | 1                   | 1                              | 325                | 36.6     | 6.79     | 2.01                          | 1                                   |
| P15018    | Leukemia inhibitory factor OS=Homo sapiens OX=9606 GN=LIF PE=1 SV=1                      | 15                        | 3                       | 7                   | 3                              | 202                | 22       | 9.35     | 17.55                         | 3                                   |
| P15291    | Beta-1,4-galactosyltransferase 1 OS=Homo sapiens OX=9606 GN=B4GALT1 PE=1 SV=5            | 31                        | 7                       | 13                  | 7                              | 398                | 43.9     | 8.65     | 34.62                         | 7                                   |
| P18065    | Insulin-like growth factor-binding protein 2 OS=Homo sapiens OX=9606 GN=IGFBP2 PE=1 SV=2 | 33                        | 7                       | 24                  | 7                              | 325                | 34.8     | 7.5      | 62.35                         | 7                                   |
| P18206    | Vinculin OS=Homo sapiens OX=9606 GN=VCL PE=1 SV=4                                        | 18                        | 16                      | 30                  | 16                             | 1134               | 123.7    | 5.66     | 73.5                          | 16                                  |
| P19022    | Cadherin-2 OS=Homo sapiens OX=9606 GN=CDH2 PE=1 SV=4                                     | 8                         | 6                       | 17                  | 6                              | 906                | 99.7     | 4.81     | 42.93                         | 6                                   |

| Accession | Description                                                                                   | Coverage [%] <sup>a</sup> | # Peptides <sup>b</sup> | # PSMs <sup>c</sup> | # Unique Peptides <sup>d</sup> | # AAs <sup>e</sup> | MW [kDa] | Calc. pI | Score Sequest HT <sup>g</sup> | # Peptides: Sequest HT <sup>h</sup> |
|-----------|-----------------------------------------------------------------------------------------------|---------------------------|-------------------------|---------------------|--------------------------------|--------------------|----------|----------|-------------------------------|-------------------------------------|
| P19320    | Vascular cell adhesion protein 1 OS=Homo sapiens OX=9606 GN=VCAM1 PE=1 SV=1                   | 26                        | 15                      | 31                  | 15                             | 739                | 81.2     | 5.22     | 72.06                         | 15                                  |
| P19875    | C-X-C motif chemokine 2 OS=Homo sapiens OX=9606 GN=CXCL2 PE=1 SV=1                            | 37                        | 3                       | 33                  | 1                              | 107                | 11.4     | 10.55    | 113.11                        | 3                                   |
| P19876    | C-X-C motif chemokine 3 OS=Homo sapiens OX=9606 GN=CXCL3 PE=1 SV=1                            | 38                        | 3                       | 35                  | 1                              | 107                | 11.3     | 10.37    | 119.5                         | 3                                   |
| P20618    | Proteasome subunit beta type-1 OS=Homo sapiens OX=9606 GN=PSMB1 PE=1 SV=2                     | 6                         | 1                       | 1                   | 1                              | 241                | 26.5     | 8.13     | 2.01                          | 1                                   |
| P20809    | Interleukin-11 OS=Homo sapiens OX=9606 GN=IL11 PE=1 SV=1                                      | 27                        | 4                       | 8                   | 4                              | 199                | 21.4     | 10.62    | 16.86                         | 4                                   |
| P21333    | Filamin-A OS=Homo sapiens OX=9606 GN=FLNA PE=1 SV=4                                           | 38                        | 59                      | 171                 | 57                             | 2647               | 280.6    | 6.06     | 474.63                        | 59                                  |
| P23526    | Adenosylhomocysteinase OS=Homo sapiens OX=9606 GN=AHCY PE=1 SV=4                              | 9                         | 3                       | 6                   | 3                              | 432                | 47.7     | 6.34     | 13.6                          | 3                                   |
| P24592    | Insulin-like growth factor-binding protein 6 OS=Homo sapiens OX=9606 GN=IGFBP6 PE=1 SV=1      | 22                        | 2                       | 4                   | 2                              | 240                | 25.3     | 7.81     | 15.13                         | 2                                   |
| P24844    | Myosin regulatory light polypeptide 9 OS=Homo sapiens OX=9606 GN=MYL9 PE=1 SV=4               | 34                        | 5                       | 10                  | 2                              | 172                | 19.8     | 4.92     | 22.54                         | 5                                   |
| P25398    | 40S ribosomal protein S12 OS=Homo sapiens OX=9606 GN=RPS12 PE=1 SV=3                          | 25                        | 2                       | 4                   | 2                              | 132                | 14.5     | 7.21     | 11.11                         | 2                                   |
| P25786    | Proteasome subunit alpha type-1 OS=Homo sapiens OX=9606 GN=PSMA1 PE=1 SV=1                    | 5                         | 1                       | 1                   | 1                              | 263                | 29.5     | 6.61     | 2.02                          | 1                                   |
| P26022    | Pentraxin-related protein PTX3 OS=Homo sapiens OX=9606 GN=PTX3 PE=1 SV=3                      | 39                        | 11                      | 39                  | 11                             | 381                | 41.9     | 5.01     | 107.16                        | 11                                  |
| P26038    | Moesin OS=Homo sapiens OX=9606 GN=MSN PE=1 SV=3                                               | 19                        | 9                       | 29                  | 7                              | 577                | 67.8     | 6.4      | 74.38                         | 9                                   |
| P26641    | Elongation factor 1-gamma OS=Homo sapiens OX=9606 GN=EEF1G PE=1 SV=3                          | 3                         | 1                       | 3                   | 1                              | 437                | 50.1     | 6.67     | 6.05                          | 1                                   |
| P27816    | Microtubule-associated protein 4 OS=Homo sapiens OX=9606 GN=MAP4 PE=1 SV=3                    | 9                         | 7                       | 11                  | 7                              | 1152               | 120.9    | 5.43     | 25.6                          | 7                                   |
| P28072    | Proteasome subunit beta type-6 OS=Homo sapiens OX=9606 GN=PSMB6 PE=1 SV=4                     | 5                         | 1                       | 1                   | 1                              | 239                | 25.3     | 4.92     | 2.32                          | 1                                   |
| P30041    | Peroxiredoxin-6 OS=Homo sapiens OX=9606 GN=PRDX6 PE=1 SV=3                                    | 19                        | 3                       | 8                   | 3                              | 224                | 25       | 6.38     | 20.01                         | 3                                   |
| P30044    | Peroxiredoxin-5, mitochondrial OS=Homo sapiens OX=9606 GN=PRDX5 PE=1 SV=4                     | 14                        | 2                       | 3                   | 2                              | 214                | 22.1     | 8.7      | 8.11                          | 2                                   |
| P30050    | 60S ribosomal protein L12 OS=Homo sapiens OX=9606 GN=RPL12 PE=1 SV=1                          | 15                        | 2                       | 3                   | 2                              | 165                | 17.8     | 9.42     | 6.24                          | 2                                   |
| P30530    | Tyrosine-protein kinase receptor UFO OS=Homo sapiens OX=9606 GN=AXL PE=1 SV=4                 | 3                         | 2                       | 3                   | 2                              | 894                | 98.3     | 5.39     | 7.03                          | 2                                   |
| P31946    | 14-3-3 protein beta/alpha OS=Homo sapiens OX=9606 GN=YWHAB PE=1 SV=3                          | 12                        | 2                       | 4                   | 1                              | 246                | 28.1     | 4.83     | 8.78                          | 2                                   |
| P33908    | Mannosyl-oligosaccharide 1,2-alpha-mannosidase IA OS=Homo sapiens OX=9606 GN=MAN1A1 PE=1 SV=3 | 10                        | 5                       | 5                   | 5                              | 653                | 72.9     | 6.47     | 12.14                         | 5                                   |
| P35052    | Glypican-1 OS=Homo sapiens OX=9606 GN=GPC1 PE=1 SV=2                                          | 23                        | 9                       | 19                  | 9                              | 558                | 61.6     | 7.3      | 46.87                         | 9                                   |
| P35442    | Thrombospondin-2 OS=Homo sapiens OX=9606 GN=THBS2 PE=1 SV=2                                   | 24                        | 18                      | 60                  | 16                             | 1172               | 129.9    | 4.83     | 158.75                        | 18                                  |
| P35527    | Keratin, type I cytoskeletal 9 OS=Homo sapiens OX=9606 GN=KRT9 PE=1 SV=3                      | 4                         | 2                       | 4                   | 2                              | 623                | 62       | 5.24     | 10.87                         | 2                                   |
| P35555    | Fibrillin-1 OS=Homo sapiens OX=9606 GN=FBN1 PE=1 SV=3                                         | 25                        | 46                      | 137                 | 46                             | 2871               | 312      | 4.93     | 363.16                        | 46                                  |
| P36955    | Pigment epithelium-derived factor OS=Homo sapiens OX=9606 GN=SERPINF1 PE=1 SV=4               | 28                        | 9                       | 23                  | 9                              | 418                | 46.3     | 6.38     | 58.44                         | 9                                   |
| P37802    | Transgelin-2 OS=Homo sapiens OX=9606 GN=TAGLN2 PE=1 SV=3                                      | 50                        | 8                       | 26                  | 8                              | 199                | 22.4     | 8.25     | 72.22                         | 8                                   |

| Accession | Description                                                                                 | Coverage [%] <sup>a</sup> | # Peptides <sup>b</sup> | # PSMs <sup>c</sup> | # Unique Peptides <sup>d</sup> | # AAs <sup>e</sup> | MW [kDa] | Calc. pI | Score Sequest HT <sup>g</sup> | # Peptides: Sequest HT <sup>h</sup> |
|-----------|---------------------------------------------------------------------------------------------|---------------------------|-------------------------|---------------------|--------------------------------|--------------------|----------|----------|-------------------------------|-------------------------------------|
| P40925    | Malate dehydrogenase, cytoplasmic OS=Homo sapiens OX=9606 GN=MDH1 PE=1 SV=4                 | 12                        | 3                       | 5                   | 1                              | 334                | 36.4     | 7.36     | 11.24                         | 3                                   |
| P41222    | Prostaglandin-H2 D-isomerase OS=Homo sapiens OX=9606 GN=PTGDS PE=1 SV=1                     | 17                        | 2                       | 4                   | 2                              | 190                | 21       | 7.8      | 9.87                          | 2                                   |
| P43251    | Biotinidase OS=Homo sapiens OX=9606 GN=BDT PE=1 SV=2                                        | 7                         | 3                       | 6                   | 3                              | 543                | 61.1     | 6.25     | 15.63                         | 3                                   |
| P46926    | Glucosamine-6-phosphate isomerase 1 OS=Homo sapiens OX=9606 GN=GNPDA1 PE=1 SV=1             | 4                         | 1                       | 1                   | 1                              | 289                | 32.6     | 6.92     | 2.02                          | 1                                   |
| P48061    | Stromal cell-derived factor 1 OS=Homo sapiens OX=9606 GN=CXCL12 PE=1 SV=1                   | 24                        | 2                       | 7                   | 2                              | 93                 | 10.7     | 9.88     | 16.72                         | 2                                   |
| P48307    | Tissue factor pathway inhibitor 2 OS=Homo sapiens OX=9606 GN=TFPI2 PE=1 SV=1                | 13                        | 2                       | 5                   | 2                              | 235                | 26.9     | 8.53     | 13.13                         | 2                                   |
| P48723    | Heat shock 70 kDa protein 13 OS=Homo sapiens OX=9606 GN=HSPA13 PE=1 SV=1                    | 3                         | 1                       | 1                   | 1                              | 471                | 51.9     | 5.76     | 2.43                          | 1                                   |
| P50990    | T-complex protein 1 subunit theta OS=Homo sapiens OX=9606 GN=CCT8 PE=1 SV=4                 | 4                         | 2                       | 4                   | 2                              | 548                | 59.6     | 5.6      | 8.48                          | 2                                   |
| P51884    | Lumican OS=Homo sapiens OX=9606 GN=LUM PE=1 SV=2                                            | 35                        | 10                      | 95                  | 10                             | 338                | 38.4     | 6.61     | 284.9                         | 10                                  |
| P51991    | Heterogeneous nuclear ribonucleoprotein A3 OS=Homo sapiens OX=9606 GN=HNRNPA3 PE=1 SV=2     | 3                         | 1                       | 3                   | 1                              | 378                | 39.6     | 9.01     | 6.59                          | 1                                   |
| P54578    | Ubiquitin carboxyl-terminal hydrolase 14 OS=Homo sapiens OX=9606 GN=USP14 PE=1 SV=3         | 3                         | 1                       | 1                   | 1                              | 494                | 56       | 5.3      | 2.1                           | 1                                   |
| P54802    | Alpha-N-acetylglucosaminidase OS=Homo sapiens OX=9606 GN=NAGLU PE=1 SV=2                    | 7                         | 3                       | 6                   | 3                              | 743                | 82.2     | 6.65     | 13.82                         | 3                                   |
| P55058    | Phospholipid transfer protein OS=Homo sapiens OX=9606 GN=PLTP PE=1 SV=1                     | 13                        | 5                       | 14                  | 5                              | 493                | 54.7     | 7.01     | 36.17                         | 5                                   |
| P55072    | Transitional endoplasmic reticulum ATPase OS=Homo sapiens OX=9606 GN=VCP PE=1 SV=4          | 13                        | 8                       | 11                  | 8                              | 806                | 89.3     | 5.26     | 23.33                         | 8                                   |
| P55290    | Cadherin-13 OS=Homo sapiens OX=9606 GN=CDH13 PE=1 SV=1                                      | 7                         | 4                       | 8                   | 4                              | 713                | 78.2     | 4.98     | 18.99                         | 4                                   |
| P58546    | Myotrophin OS=Homo sapiens OX=9606 GN=MTPN PE=1 SV=2                                        | 14                        | 1                       | 1                   | 1                              | 118                | 12.9     | 5.52     | 2.01                          | 1                                   |
| P59998    | Actin-related protein 2/3 complex subunit 4 OS=Homo sapiens OX=9606 GN=ARPC4 PE=1 SV=3      | 11                        | 2                       | 4                   | 2                              | 168                | 19.7     | 8.43     | 8.87                          | 2                                   |
| P62328    | Thymosin beta-4 OS=Homo sapiens OX=9606 GN=TMSB4X PE=1 SV=2                                 | 34                        | 2                       | 4                   | 2                              | 44                 | 5.1      | 5.06     | 9.81                          | 2                                   |
| P62857    | 40S ribosomal protein S28 OS=Homo sapiens OX=9606 GN=RPS28 PE=1 SV=1                        | 13                        | 1                       | 1                   | 1                              | 69                 | 7.8      | 10.7     | 1.9                           | 1                                   |
| P62906    | 60S ribosomal protein L10a OS=Homo sapiens OX=9606 GN=RPL10A PE=1 SV=2                      | 6                         | 1                       | 1                   | 1                              | 217                | 24.8     | 9.94     | 2.53                          | 1                                   |
| P62937    | Peptidyl-prolyl cis-trans isomerase A OS=Homo sapiens OX=9606 GN=PPIA PE=1 SV=2             | 32                        | 3                       | 6                   | 3                              | 165                | 18       | 7.81     | 14.61                         | 3                                   |
| P62942    | Peptidyl-prolyl cis-trans isomerase FKBP1A OS=Homo sapiens OX=9606 GN=FKBP1A PE=1 SV=2      | 26                        | 2                       | 6                   | 2                              | 108                | 11.9     | 8.16     | 15.41                         | 2                                   |
| P63220    | 40S ribosomal protein S21 OS=Homo sapiens OX=9606 GN=RPS21 PE=1 SV=1                        | 30                        | 2                       | 2                   | 2                              | 83                 | 9.1      | 8.5      | 3.96                          | 2                                   |
| P63313    | Thymosin beta-10 OS=Homo sapiens OX=9606 GN=TMSB10 PE=1 SV=2                                | 34                        | 1                       | 5                   | 1                              | 44                 | 5        | 5.36     | 13.45                         | 1                                   |
| P67936    | Tropomyosin alpha-4 chain OS=Homo sapiens OX=9606 GN=TPM4 PE=1 SV=3                         | 31                        | 8                       | 39                  | 2                              | 248                | 28.5     | 4.69     | 98.37                         | 8                                   |
| P80303    | Nucleobindin-2 OS=Homo sapiens OX=9606 GN=NUCB2 PE=1 SV=3                                   | 10                        | 3                       | 9                   | 3                              | 420                | 50.2     | 5.12     | 23.42                         | 3                                   |
| P80723    | Brain acid soluble protein 1 OS=Homo sapiens OX=9606 GN=BASP1 PE=1 SV=2                     | 12                        | 1                       | 1                   | 1                              | 227                | 22.7     | 4.63     | 2.52                          | 1                                   |
| P98066    | Tumor necrosis factor-inducible gene 6 protein OS=Homo sapiens OX=9606 GN=TNFAIP6 PE=1 SV=2 | 3                         | 1                       | 2                   | 1                              | 277                | 31.2     | 6.79     | 4.35                          | 1                                   |

| Accession | Description                                                                                                 | Coverage [%] <sup>a</sup> | # Peptides <sup>b</sup> | # PSMs <sup>c</sup> | # Unique Peptides <sup>d</sup> | # AAs <sup>e</sup> | MW [kDa] | Calc. pI | Score Sequest HT <sup>g</sup> | # Peptides: Sequest HT <sup>h</sup> |
|-----------|-------------------------------------------------------------------------------------------------------------|---------------------------|-------------------------|---------------------|--------------------------------|--------------------|----------|----------|-------------------------------|-------------------------------------|
| Q01995    | Transgelin OS=Homo sapiens OX=9606 GN=TAGLN PE=1 SV=4                                                       | 54                        | 9                       | 49                  | 9                              | 201                | 22.6     | 8.84     | 124.98                        | 9                                   |
| Q02388    | Collagen alpha-1(VII) chain OS=Homo sapiens OX=9606 GN=COL7A1 PE=1 SV=2                                     | 10                        | 15                      | 26                  | 15                             | 2944               | 295      | 6.27     | 63.23                         | 15                                  |
| Q04760    | Lactoylgutathione lyase OS=Homo sapiens OX=9606 GN=GLO1 PE=1 SV=4                                           | 15                        | 2                       | 2                   | 2                              | 184                | 20.8     | 5.31     | 4.45                          | 2                                   |
| Q05DB4    | HEBP2 protein (Fragment) OS=Homo sapiens OX=9606 GN=HEBP2 PE=2 SV=1                                         | 7                         | 1                       | 1                   | 1                              | 214                | 24       | 5.38     | 2.55                          | 1                                   |
| Q05DH1    | Proteasome subunit alpha type (Fragment) OS=Homo sapiens OX=9606 GN=PSMA7 PE=2 SV=1                         | 6                         | 1                       | 1                   | 1                              | 238                | 26.7     | 8.87     | 1.9                           | 1                                   |
| Q06210    | Glutamine--fructose-6-phosphate aminotransferase [isomerizing] 1 OS=Homo sapiens OX=9606 GN=GFPT1 PE=1 SV=3 | 4                         | 2                       | 4                   | 2                              | 699                | 78.8     | 7.11     | 8.34                          | 2                                   |
| Q07954    | Prolow-density lipoprotein receptor-related protein 1 OS=Homo sapiens OX=9606 GN=LRP1 PE=1 SV=2             | 4                         | 13                      | 22                  | 13                             | 4544               | 504.3    | 5.39     | 52.1                          | 13                                  |
| Q08629    | Testican-1 OS=Homo sapiens OX=9606 GN=SPOCK1 PE=1 SV=1                                                      | 12                        | 4                       | 13                  | 4                              | 439                | 49.1     | 6.1      | 32.7                          | 4                                   |
| Q09666    | Neuroblast differentiation-associated protein AHNAK OS=Homo sapiens OX=9606 GN=AHNAK PE=1 SV=2              | 12                        | 32                      | 57                  | 32                             | 5890               | 628.7    | 6.15     | 124.56                        | 32                                  |
| Q0Z944    | Beta globin (Fragment) OS=Homo sapiens OX=9606 GN=HBB PE=3 SV=1                                             | 10                        | 1                       | 1                   | 1                              | 105                | 11.5     | 6.37     | 2.16                          | 1                                   |
| Q10471    | Polypeptide N-acetylgalactosaminyltransferase 2 OS=Homo sapiens OX=9606 GN=GALNT2 PE=1 SV=1                 | 12                        | 5                       | 8                   | 5                              | 571                | 64.7     | 8.35     | 18.17                         | 5                                   |
| Q12841    | Follistatin-related protein 1 OS=Homo sapiens OX=9606 GN=FSTL1 PE=1 SV=1                                    | 40                        | 11                      | 83                  | 11                             | 308                | 35       | 5.52     | 266.69                        | 11                                  |
| Q13217    | DnaJ homolog subfamily C member 3 OS=Homo sapiens OX=9606 GN=DNAJC3 PE=1 SV=1                               | 6                         | 2                       | 4                   | 2                              | 504                | 57.5     | 6.15     | 10.14                         | 2                                   |
| Q13219    | Pappalysin-1 OS=Homo sapiens OX=9606 GN=PAPPA PE=1 SV=3                                                     | 10                        | 11                      | 23                  | 11                             | 1627               | 180.9    | 6.18     | 56.02                         | 11                                  |
| Q13561    | Dynactin subunit 2 OS=Homo sapiens OX=9606 GN=DCTN2 PE=1 SV=4                                               | 7                         | 2                       | 2                   | 2                              | 401                | 44.2     | 5.21     | 4.65                          | 2                                   |
| Q14112    | Nidogen-2 OS=Homo sapiens OX=9606 GN=NID2 PE=1 SV=3                                                         | 6                         | 6                       | 9                   | 5                              | 1375               | 151.2    | 5.29     | 19.46                         | 6                                   |
| Q14315    | Filamin-C OS=Homo sapiens OX=9606 GN=FLNC PE=1 SV=3                                                         | 5                         | 10                      | 20                  | 8                              | 2725               | 290.8    | 5.97     | 45.48                         | 10                                  |
| Q14393    | Growth arrest-specific protein 6 OS=Homo sapiens OX=9606 GN=GAS6 PE=1 SV=3                                  | 18                        | 7                       | 18                  | 7                              | 678                | 74.9     | 5.69     | 49.4                          | 7                                   |
| Q14767    | Latent-transforming growth factor beta-binding protein 2 OS=Homo sapiens OX=9606 GN=LTBP2 PE=1 SV=3         | 13                        | 15                      | 43                  | 15                             | 1821               | 194.9    | 5.19     | 114.24                        | 15                                  |
| Q15084    | Protein disulfide-isomerase A6 OS=Homo sapiens OX=9606 GN=PDIA6 PE=1 SV=1                                   | 13                        | 4                       | 9                   | 4                              | 440                | 48.1     | 5.08     | 23.39                         | 4                                   |
| Q15149    | Plectin OS=Homo sapiens OX=9606 GN=PLEC PE=1 SV=3                                                           | 6                         | 25                      | 41                  | 25                             | 4684               | 531.5    | 5.96     | 92.87                         | 25                                  |
| Q15293    | Reticulocalbin-1 OS=Homo sapiens OX=9606 GN=RCN1 PE=1 SV=1                                                  | 7                         | 2                       | 3                   | 2                              | 331                | 38.9     | 5        | 5.89                          | 2                                   |
| Q15365    | Poly(rC)-binding protein 1 OS=Homo sapiens OX=9606 GN=PCBP1 PE=1 SV=2                                       | 6                         | 1                       | 1                   | 1                              | 356                | 37.5     | 7.09     | 2.71                          | 1                                   |
| Q15582    | Transforming growth factor-beta-induced protein ig-h3 OS=Homo sapiens OX=9606 GN=TGFB1 PE=1 SV=1            | 47                        | 18                      | 136                 | 18                             | 683                | 74.6     | 7.71     | 422.91                        | 18                                  |
| Q16270    | Insulin-like growth factor-binding protein 7 OS=Homo sapiens OX=9606 GN=IGFBP7 PE=1 SV=1                    | 45                        | 10                      | 74                  | 10                             | 282                | 29.1     | 7.9      | 241.96                        | 10                                  |
| Q16394    | Exostosin-1 OS=Homo sapiens OX=9606 GN=EXT1 PE=1 SV=2                                                       | 5                         | 3                       | 5                   | 3                              | 746                | 86.2     | 9.04     | 11.18                         | 3                                   |
| Q16658    | Fascin OS=Homo sapiens OX=9606 GN=FSCN1 PE=1 SV=3                                                           | 12                        | 4                       | 8                   | 4                              | 493                | 54.5     | 7.24     | 24.25                         | 4                                   |
| Q16778    | Histone H2B type 2-E OS=Homo sapiens OX=9606 GN=HIST2H2BE PE=1 SV=3                                         | 12                        | 1                       | 2                   | 1                              | 126                | 13.9     | 10.32    | 4.49                          | 1                                   |

| Accession | Description                                                                                                          | Coverage [%] <sup>a</sup> | # Peptides <sup>b</sup> | # PSMs <sup>c</sup> | # Unique Peptides <sup>d</sup> | # AAs <sup>e</sup> | MW [kDa] | Calc. pI | Score Sequest HT <sup>g</sup> | # Peptides: Sequest HT <sup>h</sup> |
|-----------|----------------------------------------------------------------------------------------------------------------------|---------------------------|-------------------------|---------------------|--------------------------------|--------------------|----------|----------|-------------------------------|-------------------------------------|
| Q2HIZ0    | Thrombospondin 3 OS=Homo sapiens OX=9606 GN=THBS3 PE=2 SV=1                                                          | 6                         | 3                       | 6                   | 3                              | 956                | 104.1    | 4.65     | 16.73                         | 3                                   |
| Q4ZHG4    | Fibronectin type III domain-containing protein 1 OS=Homo sapiens OX=9606 GN=FNDC1 PE=2 SV=4                          | 14                        | 19                      | 55                  | 19                             | 1894               | 205.4    | 9.32     | 145.42                        | 19                                  |
| Q53FA4    | Cysteine-rich, angiogenic inducer, 61 variant (Fragment) OS=Homo sapiens OX=9606 PE=2 SV=1                           | 18                        | 4                       | 10                  | 4                              | 381                | 42       | 8.31     | 24.61                         | 4                                   |
| Q53FA7    | Quinone oxidoreductase PIG3 OS=Homo sapiens OX=9606 GN=TP53I3 PE=1 SV=2                                              | 4                         | 1                       | 2                   | 1                              | 332                | 35.5     | 7.17     | 3.9                           | 1                                   |
| Q53G71    | Calreticulin variant (Fragment) OS=Homo sapiens OX=9606 PE=2 SV=1                                                    | 12                        | 3                       | 8                   | 3                              | 406                | 46.9     | 4.45     | 19.71                         | 3                                   |
| Q53G75    | Matrix metalloproteinase 1 preproprotein variant (Fragment) OS=Homo sapiens OX=9606 PE=2 SV=1                        | 25                        | 6                       | 12                  | 6                              | 405                | 46.5     | 7.03     | 29.26                         | 6                                   |
| Q53G99    | Beta actin variant (Fragment) OS=Homo sapiens OX=9606 PE=2 SV=1                                                      | 42                        | 10                      | 55                  | 1                              | 375                | 41.7     | 5.59     | 167.43                        | 10                                  |
| Q53GN4    | WD repeat domain 1, isoform CRA_a (Fragment) OS=Homo sapiens OX=9606 GN=WDR1 PE=2 SV=1                               | 10                        | 4                       | 6                   | 4                              | 606                | 66.1     | 6.65     | 12.39                         | 4                                   |
| Q53GY0    | Plastin 3 variant (Fragment) OS=Homo sapiens OX=9606 PE=2 SV=1                                                       | 22                        | 9                       | 17                  | 9                              | 630                | 70.7     | 5.68     | 42.21                         | 9                                   |
| Q53HQ7    | Elongation factor 1-alpha (Fragment) OS=Homo sapiens OX=9606 PE=2 SV=1                                               | 16                        | 4                       | 9                   | 4                              | 462                | 50.2     | 8.94     | 24.73                         | 4                                   |
| Q53R94    | Uncharacterized protein RTN4 (Fragment) OS=Homo sapiens OX=9606 GN=RTN4 PE=4 SV=1                                    | 7                         | 1                       | 2                   | 1                              | 185                | 19.3     | 4.13     | 4.21                          | 1                                   |
| Q53XB4    | Full-length cDNA clone CS0DF032YM23 of Fetal brain of Homo sapiens (human) OS=Homo sapiens OX=9606 GN=RAB1 PE=2 SV=1 | 12                        | 2                       | 2                   | 2                              | 147                | 16.8     | 9.03     | 5.18                          | 2                                   |
| Q59GA0    | Thy-1 cell surface antigen variant (Fragment) OS=Homo sapiens OX=9606 PE=2 SV=1                                      | 10                        | 1                       | 3                   | 1                              | 145                | 15.9     | 9        | 7.18                          | 1                                   |
| Q5M8T4    | Connective tissue growth factor OS=Homo sapiens OX=9606 GN=CTGF PE=2 SV=1                                            | 34                        | 8                       | 16                  | 8                              | 349                | 38       | 7.94     | 40.13                         | 8                                   |
| Q5NKV8    | Intercellular adhesion molecule 1 OS=Homo sapiens OX=9606 GN=ICAM1 PE=2 SV=1                                         | 9                         | 3                       | 9                   | 3                              | 532                | 57.8     | 7.68     | 22.68                         | 3                                   |
| Q5U0A0    | Proteasome subunit alpha type OS=Homo sapiens OX=9606 PE=2 SV=1                                                      | 5                         | 1                       | 3                   | 1                              | 241                | 26.4     | 4.79     | 6.58                          | 1                                   |
| Q641Q3    | Meteorin-like protein OS=Homo sapiens OX=9606 GN=METRNL PE=2 SV=1                                                    | 16                        | 3                       | 7                   | 3                              | 311                | 34.4     | 8.35     | 19.48                         | 3                                   |
| Q6DEN2    | DPYSL3 protein OS=Homo sapiens OX=9606 GN=DPYSL3 PE=2 SV=1                                                           | 6                         | 3                       | 6                   | 2                              | 684                | 73.9     | 6.55     | 13.85                         | 3                                   |
| Q6EMK4    | Vasorin OS=Homo sapiens OX=9606 GN=VASN PE=1 SV=1                                                                    | 6                         | 3                       | 9                   | 3                              | 673                | 71.7     | 7.39     | 27.25                         | 3                                   |
| Q6FGX9    | Adenylate kinase isoenzyme 1 OS=Homo sapiens OX=9606 GN=AK1 PE=2 SV=1                                                | 6                         | 1                       | 1                   | 1                              | 194                | 21.6     | 8.63     | 1.92                          | 1                                   |
| Q6FHC9    | STC2 protein (Fragment) OS=Homo sapiens OX=9606 GN=STC2 PE=2 SV=1                                                    | 27                        | 4                       | 24                  | 4                              | 302                | 33.2     | 7.3      | 89.57                         | 4                                   |
| Q6FHE1    | FST protein OS=Homo sapiens OX=9606 GN=FST PE=2 SV=1                                                                 | 33                        | 6                       | 14                  | 6                              | 317                | 34.8     | 7.65     | 37.08                         | 6                                   |
| Q6FHF5    | Proliferating cell nuclear antigen (Fragment) OS=Homo sapiens OX=9606 GN=PCNA PE=2 SV=1                              | 6                         | 1                       | 1                   | 1                              | 261                | 28.7     | 4.69     | 2.33                          | 1                                   |
| Q6FHU3    | PSME1 protein (Fragment) OS=Homo sapiens OX=9606 GN=PSME1 PE=2 SV=1                                                  | 5                         | 1                       | 2                   | 1                              | 249                | 28.7     | 6.02     | 4.34                          | 1                                   |
| Q6FHW3    | DF protein OS=Homo sapiens OX=9606 GN=DF PE=2 SV=1                                                                   | 21                        | 3                       | 6                   | 3                              | 228                | 24.4     | 7.24     | 15.68                         | 3                                   |
| Q6FHZ0    | Malate dehydrogenase OS=Homo sapiens OX=9606 GN=MDH2 PE=2 SV=1                                                       | 12                        | 3                       | 6                   | 3                              | 338                | 35.5     | 8.68     | 12.54                         | 3                                   |
| Q6IAW5    | CALU protein OS=Homo sapiens OX=9606 GN=CALU PE=2 SV=1                                                               | 22                        | 4                       | 14                  | 4                              | 315                | 37.1     | 4.64     | 39.29                         | 4                                   |
| Q6NUL1    | Exostoses (Multiple) 2 OS=Homo sapiens OX=9606 GN=EXT2 PE=2 SV=1                                                     | 6                         | 3                       | 5                   | 3                              | 718                | 82.1     | 6.55     | 12.36                         | 3                                   |



| Accession | Description                                                                                       | Coverage [%] <sup>a</sup> | # Peptides <sup>b</sup> | # PSMs <sup>c</sup> | # Unique Peptides <sup>d</sup> | # AAs <sup>e</sup> | MW [kDa] | Calc. pI | Score Sequest HT <sup>g</sup> | # Peptides: Sequest HT <sup>h</sup> |
|-----------|---------------------------------------------------------------------------------------------------|---------------------------|-------------------------|---------------------|--------------------------------|--------------------|----------|----------|-------------------------------|-------------------------------------|
| Q6NUR7    | Ezrin OS=Homo sapiens OX=9606 GN=EZR PE=2 SV=1                                                    | 5                         | 3                       | 8                   | 1                              | 586                | 69.2     | 6.27     | 17.06                         | 3                                   |
| Q6NVI1    | MARCKS protein (Fragment) OS=Homo sapiens OX=9606 GN=MARCKS PE=2 SV=1                             | 20                        | 1                       | 4                   | 1                              | 157                | 14.9     | 4.79     | 15.47                         | 1                                   |
| Q6UVK1    | Chondroitin sulfate proteoglycan 4 OS=Homo sapiens OX=9606 GN=CSPG4 PE=1 SV=2                     | 1                         | 2                       | 5                   | 2                              | 2322               | 250.4    | 5.47     | 13.68                         | 2                                   |
| Q6YHK3    | CD109 antigen OS=Homo sapiens OX=9606 GN=CD109 PE=1 SV=2                                          | 6                         | 7                       | 17                  | 7                              | 1445               | 161.6    | 5.85     | 40.61                         | 7                                   |
| Q6ZN40    | Tropomyosin 1 (Alpha), isoform CRA_f OS=Homo sapiens OX=9606 GN=TPM1 PE=1 SV=1                    | 25                        | 8                       | 23                  | 1                              | 326                | 37.4     | 4.72     | 60.79                         | 8                                   |
| Q75MU2    | Uncharacterized protein WBSCR1 (Fragment) OS=Homo sapiens OX=9606 GN=WBSCR1 PE=4 SV=1             | 8                         | 1                       | 1                   | 1                              | 156                | 17.1     | 5.31     | 2.2                           | 1                                   |
| Q7Z2W2    | Extracellular sulfatase OS=Homo sapiens OX=9606 GN=DKFZp686F13142 PE=2 SV=1                       | 2                         | 1                       | 3                   | 1                              | 871                | 101      | 9.09     | 6.87                          | 1                                   |
| Q7Z7M9    | Polypeptide N-acetylgalactosaminyltransferase 5 OS=Homo sapiens OX=9606 GN=GALNT5 PE=1 SV=1       | 9                         | 7                       | 17                  | 7                              | 940                | 106.2    | 9.47     | 38.46                         | 7                                   |
| Q86UY0    | TXNDC5 protein OS=Homo sapiens OX=9606 GN=TXNDC5 PE=1 SV=1                                        | 3                         | 1                       | 2                   | 1                              | 360                | 40.3     | 5.83     | 4.3                           | 1                                   |
| Q86Y38    | Xylosyltransferase 1 OS=Homo sapiens OX=9606 GN=XYLT1 PE=1 SV=1                                   | 8                         | 6                       | 9                   | 6                              | 959                | 107.5    | 9.22     | 19.42                         | 6                                   |
| Q86Z22    | Epididymis secretory protein Li 297 OS=Homo sapiens OX=9606 GN=HEL-S-297 PE=2 SV=1                | 8                         | 2                       | 11                  | 2                              | 226                | 23.8     | 9.06     | 36.62                         | 2                                   |
| Q8IUX7    | Adipocyte enhancer-binding protein 1 OS=Homo sapiens OX=9606 GN=AEBP1 PE=1 SV=1                   | 18                        | 14                      | 36                  | 14                             | 1158               | 130.8    | 5.11     | 97.46                         | 14                                  |
| Q8N7G1    | Purine nucleoside phosphorylase OS=Homo sapiens OX=9606 PE=2 SV=1                                 | 12                        | 2                       | 2                   | 2                              | 293                | 32.5     | 7.21     | 5.09                          | 2                                   |
| Q8NBJ4    | Golgi membrane protein 1 OS=Homo sapiens OX=9606 GN=GOLM1 PE=1 SV=1                               | 8                         | 2                       | 3                   | 2                              | 401                | 45.3     | 4.97     | 7.12                          | 2                                   |
| Q8TBR3    | Fusion (Involved in t(1216) in malignant liposarcoma) OS=Homo sapiens OX=9606 GN=FUS PE=2 SV=1    | 2                         | 1                       | 2                   | 1                              | 526                | 53.4     | 9.38     | 4.17                          | 1                                   |
| Q8WUJ3    | Cell migration-inducing and hyaluronan-binding protein OS=Homo sapiens OX=9606 GN=CEMIP PE=1 SV=2 | 5                         | 5                       | 6                   | 5                              | 1361               | 152.9    | 7.85     | 12.41                         | 5                                   |
| Q8WX93    | Palladin OS=Homo sapiens OX=9606 GN=PALLD PE=1 SV=3                                               | 3                         | 1                       | 1                   | 1                              | 1383               | 150.5    | 7.09     | 2.64                          | 1                                   |
| Q92520    | Protein FAM3C OS=Homo sapiens OX=9606 GN=FAM3C PE=1 SV=1                                          | 21                        | 3                       | 8                   | 3                              | 227                | 24.7     | 8.29     | 22.33                         | 3                                   |
| Q92626    | Peroxidasin homolog OS=Homo sapiens OX=9606 GN=PXDN PE=1 SV=2                                     | 25                        | 21                      | 56                  | 21                             | 1479               | 165.2    | 7.17     | 149.32                        | 21                                  |
| Q969H8    | Myeloid-derived growth factor OS=Homo sapiens OX=9606 GN=MYDGF PE=1 SV=1                          | 9                         | 1                       | 3                   | 1                              | 173                | 18.8     | 6.68     | 7.17                          | 1                                   |
| Q96AY3    | Peptidyl-prolyl cis-trans isomerase FKBP10 OS=Homo sapiens OX=9606 GN=FKBP10 PE=1 SV=1            | 20                        | 9                       | 17                  | 9                              | 582                | 64.2     | 5.62     | 36.06                         | 9                                   |
| Q96C90    | Protein phosphatase 1 regulatory subunit 14B OS=Homo sapiens OX=9606 GN=PPP1R14B PE=1 SV=3        | 18                        | 1                       | 1                   | 1                              | 147                | 15.9     | 4.86     | 3.32                          | 1                                   |
| Q96D15    | Reticulocalbin-3 OS=Homo sapiens OX=9606 GN=RCN3 PE=1 SV=1                                        | 13                        | 3                       | 9                   | 3                              | 328                | 37.5     | 4.89     | 20.55                         | 3                                   |
| Q96HC4    | PDZ and LIM domain protein 5 OS=Homo sapiens OX=9606 GN=PDLIM5 PE=1 SV=5                          | 12                        | 5                       | 11                  | 5                              | 596                | 63.9     | 8.21     | 24.88                         | 5                                   |
| Q99715    | Collagen alpha-1(XII) chain OS=Homo sapiens OX=9606 GN=COL12A1 PE=1 SV=2                          | 33                        | 66                      | 235                 | 66                             | 3063               | 332.9    | 5.53     | 643.46                        | 66                                  |
| Q99988    | Growth/differentiation factor 15 OS=Homo sapiens OX=9606 GN=GDF15 PE=1 SV=3                       | 5                         | 1                       | 2                   | 1                              | 308                | 34.1     | 9.66     | 4.54                          | 1                                   |
| Q9BRK3    | Matrix remodeling-associated protein 8 OS=Homo sapiens OX=9606 GN=MXRA8 PE=1 SV=1                 | 5                         | 2                       | 3                   | 2                              | 442                | 49.1     | 7.23     | 6.36                          | 2                                   |
| Q9BS26    | Endoplasmic reticulum resident protein 44 OS=Homo sapiens OX=9606 GN=ERP44 PE=1 SV=1              | 4                         | 1                       | 1                   | 1                              | 406                | 46.9     | 5.26     | 2.21                          | 1                                   |

| Accession  | Description                                                                                         | Coverage [%] <sup>a</sup> | # Peptides <sup>b</sup> | # PSMs <sup>c</sup> | # Unique Peptides <sup>d</sup> | # AAs <sup>e</sup> | MW [kDa] | Calc. pI <sup>f</sup> | Score Sequest HT <sup>g</sup> | # Peptides: Sequest HT <sup>h</sup> |
|------------|-----------------------------------------------------------------------------------------------------|---------------------------|-------------------------|---------------------|--------------------------------|--------------------|----------|-----------------------|-------------------------------|-------------------------------------|
| Q9H3K6     | BolA-like protein 2 OS=Homo sapiens OX=9606 GN=BOLA2 PE=1 SV=1                                      | 19                        | 1                       | 1                   | 1                              | 86                 | 10.1     | 6.52                  | 2.84                          | 1                                   |
| Q9H4F8     | SPARC-related modular calcium-binding protein 1 OS=Homo sapiens OX=9606 GN=SMOC1 PE=1 SV=1          | 3                         | 1                       | 3                   | 1                              | 434                | 48.1     | 8.22                  | 10.04                         | 1                                   |
| Q9NQ30     | Endothelial cell-specific molecule 1 OS=Homo sapiens OX=9606 GN=ESM1 PE=1 SV=2                      | 7                         | 1                       | 1                   | 1                              | 184                | 20.1     | 7.34                  | 1.9                           | 1                                   |
| Q9NQ81     | Uridine diphospho-glucose dehydrogenase (Fragment) OS=Homo sapiens OX=9606 GN=GDH PE=4 SV=1         | 8                         | 1                       | 1                   | 1                              | 164                | 17.8     | 6.16                  | 2.22                          | 1                                   |
| Q9NS15     | Latent-transforming growth factor beta-binding protein 3 OS=Homo sapiens OX=9606 GN=LTBP3 PE=1 SV=4 | 1                         | 1                       | 1                   | 1                              | 1303               | 139.3    | 6.07                  | 2.14                          | 1                                   |
| Q9UBX1     | Cathepsin F OS=Homo sapiens OX=9606 GN=CTSF PE=1 SV=1                                               | 4                         | 1                       | 1                   | 1                              | 484                | 53.3     | 8.22                  | 2.46                          | 1                                   |
| Q9Y240     | C-type lectin domain family 11 member A OS=Homo sapiens OX=9606 GN=CLEC11A PE=1 SV=1                | 16                        | 4                       | 13                  | 4                              | 323                | 35.7     | 5.16                  | 31.88                         | 4                                   |
| Q9Y490     | Talin-1 OS=Homo sapiens OX=9606 GN=TLN1 PE=1 SV=3                                                   | 4                         | 7                       | 12                  | 7                              | 2541               | 269.6    | 6.07                  | 26.66                         | 7                                   |
| Q9Y6C2     | EMILIN-1 OS=Homo sapiens OX=9606 GN=EMILIN1 PE=1 SV=3                                               | 15                        | 8                       | 13                  | 8                              | 1016               | 106.6    | 5.17                  | 33.05                         | 8                                   |
| S4R3N1     | HSPE1-MOB4 readthrough OS=Homo sapiens OX=9606 GN=HSPE1-MOB4 PE=3 SV=1                              | 5                         | 1                       | 3                   | 1                              | 261                | 29.7     | 6.16                  | 8.62                          | 1                                   |
| V9HW25     | Epididymis secretory protein Li 273 OS=Homo sapiens OX=9606 GN=HEL-S-273 PE=2 SV=1                  | 24                        | 8                       | 36                  | 2                              | 284                | 33       | 4.67                  | 90.26                         | 8                                   |
| V9HW74     | Ubiquitin carboxyl-terminal hydrolase OS=Homo sapiens OX=9606 GN=HEL-117 PE=2 SV=1                  | 10                        | 1                       | 2                   | 1                              | 223                | 24.8     | 5.48                  | 4.68                          | 1                                   |
| V9HW98     | Epididymis luminal protein 2 OS=Homo sapiens OX=9606 GN=HEL2 PE=1 SV=1                              | 47                        | 9                       | 19                  | 8                              | 255                | 29.2     | 4.74                  | 45.64                         | 9                                   |
| V9HWB4     | Epididymis secretory sperm binding protein Li 89n OS=Homo sapiens OX=9606 GN=HEL-S-89n PE=2 SV=1    | 18                        | 8                       | 26                  | 7                              | 654                | 72.3     | 5.16                  | 72.46                         | 8                                   |
| V9HWB8     | Pyruvate kinase OS=Homo sapiens OX=9606 GN=HEL-S-30 PE=1 SV=1                                       | 40                        | 14                      | 40                  | 3                              | 531                | 57.9     | 7.84                  | 110.41                        | 14                                  |
| V9HWC6     | Peptidyl-prolyl cis-trans isomerase OS=Homo sapiens OX=9606 GN=HEL-S-39 PE=2 SV=1                   | 28                        | 5                       | 18                  | 5                              | 208                | 22.7     | 9.32                  | 47.38                         | 5                                   |
| V9HWE8     | Epididymis secretory sperm binding protein Li 47e OS=Homo sapiens OX=9606 GN=HEL-S-47e PE=2 SV=1    | 15                        | 2                       | 6                   | 2                              | 204                | 23.2     | 5.11                  | 14.61                         | 2                                   |
| V9HWF4     | Phosphoglycerate kinase OS=Homo sapiens OX=9606 GN=HEL-S-68p PE=2 SV=1                              | 4                         | 1                       | 2                   | 1                              | 417                | 44.6     | 8.1                   | 3.87                          | 1                                   |
| V9HWI5     | Cofilin 1 (Non-muscle), isoform CRA_b OS=Homo sapiens OX=9606 GN=HEL-S-15 PE=2 SV=1                 | 43                        | 4                       | 12                  | 3                              | 166                | 18.5     | 8.09                  | 29.22                         | 4                                   |
| V9HWN7     | Fructose-bisphosphate aldolase OS=Homo sapiens OX=9606 GN=HEL-S-87p PE=2 SV=1                       | 22                        | 5                       | 18                  | 5                              | 364                | 39.4     | 8.09                  | 53.84                         | 5                                   |
| V9HWP2     | Epididymis luminal protein 35 OS=Homo sapiens OX=9606 GN=HEL-S-125m PE=2 SV=1                       | 10                        | 6                       | 14                  | 5                              | 803                | 92.4     | 4.84                  | 38.71                         | 6                                   |
| A0A024QYX3 | RNA binding motif (RNP1, RRM) protein 3, isoform CRA_c OS=Homo sapiens OX=9606 GN=RBM3 PE=4 SV=1    | 11                        | 1                       | 2                   | 1                              | 157                | 17.2     | 8.91                  | 5.46                          | 1                                   |

<sup>a</sup> Coverage is the percentage of the sequence covered by identifications (PSMs only) from the included searches. <sup>b</sup> # Peptides is the number of distinct peptide sequences in the protein. <sup>c</sup> # PSMs is number of identified peptide spectrum matches identified from all included searches, including those redundantly identified. <sup>d</sup> # Unique peptide is the total number of distinct peptide sequences unique to the protein group. <sup>e</sup> #AAs is length of the protein sequence. <sup>f</sup> Calc pI (isoelectric point) number is theoretically calculated isoelectric point for the protein that is, the pH at which a particular molecule carries no net electrical charge. <sup>g</sup> Score Sequest HT is a protein score calculated by summing the individual scores for each peptide. The higher this score, the higher the individual score of the peptide, allowing for better identification. <sup>h</sup> # Peptides: Sequest HT is the number of distinct peptide sequences in the identified protein.

Supplementary Table 1-3: Detailed information on commonly secreted proteins by 3 adipose tissue (AT) mesenchymal stem cells (MSCs) under normal condition.

| Accession  | Description                                                                                                                                                | Coverage [%] <sup>a</sup> | # Peptides <sup>b</sup> | # PSMs <sup>c</sup> | # Unique Peptides <sup>d</sup> | # AAs <sup>e</sup> | MW [kDa] | Calc. pI <sup>f</sup> | Score Sequest HT <sup>g</sup> | # Peptides: Sequest HT <sup>h</sup> |
|------------|------------------------------------------------------------------------------------------------------------------------------------------------------------|---------------------------|-------------------------|---------------------|--------------------------------|--------------------|----------|-----------------------|-------------------------------|-------------------------------------|
| A0A024QYT5 | Serpin peptidase inhibitor, clade E (Nexin, plasminogen activator inhibitor type 1), member 1, isoform CRA_b OS=Homo sapiens OX=9606 GN=SERPINE1 PE=3 SV=1 | 33                        | 10                      | 28                  | 10                             | 402                | 45       | 7.2                   | 79.82                         | 10                                  |
| A0A024R1N1 | Myosin, heavy polypeptide 9, non-muscle, isoform CRA_a OS=Homo sapiens OX=9606 GN=MYH9 PE=3 SV=1                                                           | 12                        | 15                      | 25                  | 15                             | 1960               | 226.4    | 5.6                   | 62.73                         | 15                                  |
| A0A024R1U8 | Insulin-like growth factor binding protein 4, isoform CRA_a OS=Homo sapiens OX=9606 GN=IGFBP4 PE=4 SV=1                                                    | 25                        | 5                       | 12                  | 5                              | 258                | 27.9     | 7.15                  | 29.76                         | 5                                   |
| A0A024R1Z6 | Vesicle amine transport protein 1 homolog (T. californica), isoform CRA_a OS=Homo sapiens OX=9606 GN=VAT1 PE=4 SV=1                                        | 17                        | 4                       | 4                   | 4                              | 393                | 41.9     | 6.29                  | 10.02                         | 4                                   |
| A0A024R222 | Phosphoserine aminotransferase OS=Homo sapiens OX=9606 GN=PSAT1 PE=3 SV=1                                                                                  | 6                         | 2                       | 2                   | 2                              | 370                | 40.4     | 7.66                  | 4.11                          | 2                                   |
| A0A024R2P0 | 40S ribosomal protein SA OS=Homo sapiens OX=9606 GN=RPSA PE=3 SV=1                                                                                         | 15                        | 3                       | 4                   | 3                              | 295                | 32.8     | 4.87                  | 8.73                          | 3                                   |
| A0A024R2W4 | Dystroglycan 1 (Dystrophin-associated glycoprotein 1), isoform CRA_a OS=Homo sapiens OX=9606 GN=DAG1 PE=4 SV=1                                             | 4                         | 2                       | 3                   | 2                              | 895                | 97.5     | 8.56                  | 7.62                          | 2                                   |
| A0A024R321 | Filamin B, beta (Actin binding protein 278), isoform CRA_a OS=Homo sapiens OX=9606 GN=FLNB PE=4 SV=1                                                       | 4                         | 7                       | 9                   | 6                              | 2622               | 280.3    | 5.94                  | 19.6                          | 7                                   |
| A0A024R462 | Fibronectin 1, isoform CRA_n OS=Homo sapiens OX=9606 GN=FN1 PE=4 SV=1                                                                                      | 57                        | 77                      | 760                 | 1                              | 2355               | 259      | 5.73                  | 2472.92                       | 77                                  |
| A0A024R498 | Serpin peptidase inhibitor, clade E (Nexin, plasminogen activator inhibitor type 1), member 2, isoform CRA_b OS=Homo sapiens OX=9606 GN=SERPINE2 PE=3 SV=1 | 36                        | 11                      | 33                  | 11                             | 397                | 44       | 9.38                  | 101                           | 11                                  |
| A0A024R694 | Actinin, alpha 1, isoform CRA_a OS=Homo sapiens OX=9606 GN=ACTN1 PE=4 SV=1                                                                                 | 36                        | 24                      | 41                  | 14                             | 892                | 103      | 5.41                  | 101.82                        | 24                                  |
| A0A024R6K8 | Tryptophanyl-tRNA synthetase, isoform CRA_a OS=Homo sapiens OX=9606 GN=WARS PE=3 SV=1                                                                      | 10                        | 3                       | 3                   | 3                              | 471                | 53.1     | 6.23                  | 7                             | 3                                   |
| A0A024R6R4 | Matrix metalloproteinase 2 (Gelatinase A, 72kDa gelatinase, 72kDa type IV collagenase), isoform CRA_a OS=Homo sapiens OX=9606 GN=MMP2 PE=3 SV=1            | 54                        | 23                      | 116                 | 23                             | 660                | 73.8     | 5.47                  | 345.42                        | 23                                  |
| A0A024R8V7 | TIMP metalloproteinase inhibitor 2, isoform CRA_b OS=Homo sapiens OX=9606 GN=TIMP2 PE=4 SV=1                                                               | 41                        | 6                       | 29                  | 6                              | 179                | 20.2     | 7.17                  | 84.66                         | 6                                   |
| A0A024R962 | HCG40889, isoform CRA_b OS=Homo sapiens OX=9606 GN=hCG_40889 PE=4 SV=1                                                                                     | 10                        | 9                       | 16                  | 9                              | 1231               | 139      | 6.62                  | 39.27                         | 9                                   |
| A0A024RA94 | Microfibrillar-associated protein 2, isoform CRA_d OS=Homo sapiens OX=9606 GN=MFAP2 PE=4 SV=1                                                              | 7                         | 1                       | 2                   | 1                              | 183                | 20.8     | 4.97                  | 4.11                          | 1                                   |
| A0A024RAM4 | Microtubule-associated protein 1B, isoform CRA_b OS=Homo sapiens OX=9606 GN=MAP1B PE=4 SV=1                                                                | 1                         | 1                       | 1                   | 1                              | 2468               | 270.5    | 4.81                  | 0                             | 1                                   |
| A0A024RD80 | Heat shock protein 90kDa alpha (Cytosolic), class B member 1, isoform CRA_a OS=Homo sapiens OX=9606 GN=HSP90AB1 PE=3 SV=1                                  | 5                         | 3                       | 4                   | 2                              | 724                | 83.2     | 5.03                  | 8.17                          | 3                                   |
| A0A024RDW8 | Collagen, type IV, alpha 2, isoform CRA_a OS=Homo sapiens OX=9606 GN=COL4A2 PE=4 SV=1                                                                      | 20                        | 18                      | 36                  | 18                             | 1712               | 167.4    | 8.66                  | 102.54                        | 18                                  |
| A0A087WTA8 | Collagen alpha-2(I) chain OS=Homo sapiens OX=9606 GN=COL1A2 PE=1 SV=1                                                                                      | 60                        | 42                      | 1088                | 42                             | 1364               | 129.1    | 9.01                  | 3539.78                       | 42                                  |
| A0A087WVQ6 | Clathrin heavy chain OS=Homo sapiens OX=9606 GN=CLTC PE=1 SV=1                                                                                             | 5                         | 4                       | 4                   | 4                              | 1679               | 191.9    | 5.69                  | 10.16                         | 4                                   |
| A0A087WX80 | Laminin subunit alpha-2 OS=Homo sapiens OX=9606 GN=LAMA2 PE=1 SV=1                                                                                         | 7                         | 14                      | 20                  | 14                             | 3121               | 343.5    | 6.39                  | 46.89                         | 14                                  |
| A0A087WZ51 | Tumor protein D54 OS=Homo sapiens OX=9606 GN=TPD52L2 PE=1 SV=1                                                                                             | 23                        | 2                       | 2                   | 2                              | 152                | 16.3     | 4.92                  | 3.99                          | 2                                   |
| A0A087X0S5 | Collagen alpha-1(VI) chain OS=Homo sapiens OX=9606 GN=COL6A1 PE=1 SV=1                                                                                     | 46                        | 30                      | 200                 | 30                             | 1026               | 108.3    | 5.43                  | 595.93                        | 30                                  |
| A0A090N8Y2 | Protein disulfide-isomerase A4 OS=Homo sapiens OX=9606 GN=ERP70 PE=2 SV=1                                                                                  | 2                         | 1                       | 1                   | 1                              | 645                | 72.9     | 5.07                  | 2.14                          | 1                                   |
| A0A0A0MT01 | Gelsolin OS=Homo sapiens OX=9606 GN=GSN PE=1 SV=1                                                                                                          | 31                        | 12                      | 35                  | 11                             | 767                | 84.7     | 5.83                  | 104.9                         | 12                                  |
| A0A0B4J1R6 | Transketolase OS=Homo sapiens OX=9606 GN=TKT PE=1 SV=1                                                                                                     | 28                        | 6                       | 10                  | 6                              | 457                | 49.9     | 7.91                  | 26.09                         | 6                                   |

| Accession  | Description                                                                                                                                                            | Coverage [%] <sup>a</sup> | # Peptides <sup>b</sup> | # PSMs <sup>c</sup> | # Unique Peptides <sup>d</sup> | # AAs <sup>e</sup> | MW [kDa] | Calc. pI <sup>f</sup> | Score Sequest HT <sup>g</sup> | # Peptides: Sequest HT <sup>h</sup> |
|------------|------------------------------------------------------------------------------------------------------------------------------------------------------------------------|---------------------------|-------------------------|---------------------|--------------------------------|--------------------|----------|-----------------------|-------------------------------|-------------------------------------|
| A0A0F7G8J1 | Plasminogen OS=Homo sapiens OX=9606 GN=PLG PE=2 SV=1                                                                                                                   | 2                         | 2                       | 2                   | 2                              | 809                | 90.6     | 7.36                  | 4.13                          | 2                                   |
| A0A0S2Z3G9 | Actinin alpha 4 isoform 1 (Fragment) OS=Homo sapiens OX=9606 GN=ACTN4 PE=2 SV=1                                                                                        | 30                        | 20                      | 36                  | 10                             | 911                | 104.8    | 5.44                  | 88.43                         | 20                                  |
| A0A0S2Z4G6 | Tropomyosin 1 (Alpha), isoform CRA_o (Fragment) OS=Homo sapiens OX=9606 GN=TPM1 PE=1 SV=1                                                                              | 12                        | 4                       | 10                  | 1                              | 284                | 32.7     | 4.74                  | 25.94                         | 4                                   |
| A0A140T902 | Tenascin-X OS=Homo sapiens OX=9606 GN=TNXB PE=1 SV=1                                                                                                                   | 4                         | 7                       | 7                   | 7                              | 4222               | 455.9    | 5.2                   | 15.09                         | 7                                   |
| A0A140VJI7 | Testicular tissue protein Li 61 OS=Homo sapiens OX=9606 PE=2 SV=1                                                                                                      | 45                        | 13                      | 41                  | 13                             | 540                | 60.6     | 6.71                  | 131.7                         | 13                                  |
| A0A146E5L3 | Mesenchymal stromal cell-and fibroblast-expressing Linx paralogue OS=Homo sapiens OX=9606 GN=Meflin PE=2 SV=1                                                          | 20                        | 5                       | 15                  | 5                              | 428                | 46       | 5.15                  | 45.39                         | 5                                   |
| A0A161I202 | Lactoferrin OS=Homo sapiens OX=9606 GN=LTF PE=2 SV=1                                                                                                                   | 3                         | 2                       | 7                   | 2                              | 711                | 78.3     | 8.18                  | 15.66                         | 2                                   |
| A0A172Q381 | Endosialin (Fragment) OS=Homo sapiens OX=9606 GN=TEM1 PE=2 SV=1                                                                                                        | 2                         | 1                       | 3                   | 1                              | 668                | 71.2     | 5.01                  | 8.71                          | 1                                   |
| A0A2R8Y6G6 | Alpha-enolase OS=Homo sapiens OX=9606 GN=ENO1 PE=1 SV=1                                                                                                                | 46                        | 11                      | 26                  | 11                             | 434                | 47.3     | 6.99                  | 74.13                         | 11                                  |
| A0A2Z6ATB6 | Drebrin A OS=Homo sapiens OX=9606 GN=DBN1 PE=2 SV=1                                                                                                                    | 3                         | 1                       | 1                   | 1                              | 695                | 76.3     | 4.51                  | 2.25                          | 1                                   |
| A0AV88     | ADAM10 protein OS=Homo sapiens OX=9606 GN=ADAM10 PE=2 SV=1                                                                                                             | 3                         | 1                       | 1                   | 1                              | 512                | 57.9     | 7.2                   | 2.61                          | 1                                   |
| A1KY36     | Cell proliferation-inducing protein 41 OS=Homo sapiens OX=9606 PE=2 SV=1                                                                                               | 7                         | 2                       | 2                   | 2                              | 745                | 73.4     | 9.61                  | 4.44                          | 2                                   |
| A1L4H1     | Soluble scavenger receptor cysteine-rich domain-containing protein SSC5D OS=Homo sapiens OX=9606 GN=SSC5D PE=1 SV=3                                                    | 2                         | 2                       | 2                   | 2                              | 1573               | 165.6    | 6.13                  | 4.31                          | 2                                   |
| A3KC71     | Nuclear envelope protein okuribin OS=Homo sapiens OX=9606 GN=okuribin PE=2 SV=1                                                                                        | 23                        | 17                      | 32                  | 17                             | 950                | 108.1    | 9.72                  | 81.27                         | 17                                  |
| A3KPE2     | Apolipoprotein C-III OS=Homo sapiens OX=9606 GN=APOC3 PE=2 SV=1                                                                                                        | 16                        | 1                       | 3                   | 1                              | 99                 | 10.8     | 5.41                  | 6.01                          | 1                                   |
| A4D1W7     | Inhibin, beta A (Activin A, activin AB alpha polypeptide) OS=Homo sapiens OX=9606 GN=INHBA PE=2 SV=1                                                                   | 25                        | 6                       | 11                  | 6                              | 426                | 47.4     | 8.03                  | 29.94                         | 6                                   |
| A4D2D2     | Procollagen C-endopeptidase enhancer OS=Homo sapiens OX=9606 GN=PCOLCE PE=4 SV=1                                                                                       | 52                        | 15                      | 43                  | 15                             | 449                | 47.9     | 7.43                  | 123.28                        | 15                                  |
| A5PLM9     | Cathepsin L1 OS=Homo sapiens OX=9606 GN=CTSL1 PE=2 SV=1                                                                                                                | 4                         | 1                       | 2                   | 1                              | 333                | 37.5     | 5.45                  | 4.21                          | 1                                   |
| A6NLN1     | Polypyrimidine tract binding protein 1, isoform CRA_b OS=Homo sapiens OX=9606 GN=PTBP1 PE=1 SV=4                                                                       | 4                         | 1                       | 1                   | 1                              | 527                | 56.5     | 9.38                  | 2.17                          | 1                                   |
| A6XMH5     | Beta-2-microglobulin OS=Homo sapiens OX=9606 PE=2 SV=1                                                                                                                 | 24                        | 1                       | 6                   | 1                              | 92                 | 10.4     | 8.02                  | 19.75                         | 1                                   |
| A6XND1     | Insulin-like growth factor binding protein 3 isoform b OS=Homo sapiens OX=9606 GN=IGFBP3 PE=1 SV=1                                                                     | 22                        | 3                       | 8                   | 3                              | 263                | 29       | 8.46                  | 20.19                         | 3                                   |
| A8K2H4     | cDNA FLJ78235 OS=Homo sapiens OX=9606 PE=2 SV=1                                                                                                                        | 29                        | 6                       | 14                  | 6                              | 339                | 37.8     | 6.3                   | 37.39                         | 6                                   |
| A8K3K1     | cDNA FLJ78096, highly similar to Homo sapiens actin, alpha, cardiac muscle (ACTC), mRNA OS=Homo sapiens OX=9606 PE=2 SV=1                                              | 17                        | 5                       | 24                  | 1                              | 377                | 42       | 5.39                  | 62.55                         | 5                                   |
| A8K482     | Aspartate aminotransferase OS=Homo sapiens OX=9606 PE=2 SV=1                                                                                                           | 3                         | 1                       | 3                   | 1                              | 430                | 47.5     | 9.23                  | 6.74                          | 1                                   |
| A8K7Q1     | cDNA FLJ77770, highly similar to Homo sapiens nucleobindin 1 (NUCB1), mRNA OS=Homo sapiens OX=9606 PE=2 SV=1                                                           | 32                        | 10                      | 29                  | 10                             | 461                | 53.9     | 5.25                  | 79.74                         | 10                                  |
| A8K8C4     | cDNA FLJ77693, highly similar to Homo sapiens calpastatin (CAST), transcript variant 3, mRNA OS=Homo sapiens OX=9606 PE=2 SV=1                                         | 3                         | 1                       | 1                   | 1                              | 431                | 47.1     | 4.84                  | 2.11                          | 1                                   |
| A8KAJ3     | cDNA FLJ77823, highly similar to Homo sapiens EGF-containing fibulin-like extracellular matrix protein 1, transcript variant 3, mRNA OS=Homo sapiens OX=9606 PE=2 SV=1 | 41                        | 14                      | 72                  | 14                             | 493                | 54.6     | 5.14                  | 220.24                        | 14                                  |
| A8MX94     | Glutathione S-transferase P OS=Homo sapiens OX=9606 GN=GSTP1 PE=1 SV=1                                                                                                 | 22                        | 3                       | 4                   | 3                              | 174                | 19.5     | 5.97                  | 9.97                          | 3                                   |

| Accession | Description                                                                                                                                                                                         | Coverage [%] <sup>a</sup> | # Peptides <sup>b</sup> | # PSMs <sup>c</sup> | # Unique Peptides <sup>d</sup> | # AAs <sup>e</sup> | MW [kDa] | Calc. pI <sup>f</sup> | Score Sequest HT <sup>g</sup> | # Peptides: Sequest HT <sup>h</sup> |
|-----------|-----------------------------------------------------------------------------------------------------------------------------------------------------------------------------------------------------|---------------------------|-------------------------|---------------------|--------------------------------|--------------------|----------|-----------------------|-------------------------------|-------------------------------------|
| B1AKZ4    | Phosphoprotein enriched in astrocytes 15, isoform CRA_a OS=Homo sapiens OX=9606 GN=PEA15 PE=2 SV=1                                                                                                  | 9                         | 1                       | 1                   | 1                              | 130                | 15       | 5.02                  | 2.48                          | 1                                   |
| B2R4R0    | Histone H4 OS=Homo sapiens OX=9606 GN=HIST1H4H PE=2 SV=1                                                                                                                                            | 33                        | 3                       | 4                   | 3                              | 103                | 11.4     | 11.36                 | 10.65                         | 3                                   |
| B2R577    | Protein S100 OS=Homo sapiens OX=9606 PE=2 SV=1                                                                                                                                                      | 20                        | 1                       | 2                   | 1                              | 90                 | 10.1     | 5.91                  | 6.26                          | 1                                   |
| B2R582    | cDNA, FLJ92374, highly similar to Homo sapiens C-type lectin domain family 3, member B (CLEC3B), mRNA OS=Homo sapiens OX=9606 PE=2 SV=1                                                             | 29                        | 4                       | 10                  | 4                              | 202                | 22.5     | 6.04                  | 23.84                         | 4                                   |
| B2R5M9    | cDNA, FLJ92537, highly similar to Homo sapiens procollagen-lysine, 2-oxoglutarate 5-dioxygenase (lysine hydroxylase, Ehlers-Danlos syndrome type VI) (PLOD), mRNA OS=Homo sapiens OX=9606 PE=2 SV=1 | 8                         | 4                       | 6                   | 4                              | 727                | 83.5     | 7.02                  | 15                            | 4                                   |
| B2R701    | cDNA, FLJ93202, Homo sapiens protease inhibitor 16 (PI16), mRNA OS=Homo sapiens OX=9606 PE=2 SV=1                                                                                                   | 17                        | 5                       | 27                  | 1                              | 428                | 45.7     | 5.38                  | 96.21                         | 5                                   |
| B2R7T8    | cDNA, FLJ93598, highly similar to Homo sapiens capping protein (actin filament) muscle Z-line, beta (CAPZB), mRNA OS=Homo sapiens OX=9606 PE=2 SV=1                                                 | 3                         | 1                       | 1                   | 1                              | 272                | 30.6     | 6                     | 1.95                          | 1                                   |
| B2R950    | cDNA, FLJ94213, highly similar to Homo sapiens pregnancy-zone protein (PZP), mRNA OS=Homo sapiens OX=9606 PE=2 SV=1                                                                                 | 2                         | 3                       | 5                   | 1                              | 1482               | 163.8    | 6.38                  | 11.54                         | 3                                   |
| B2RBS8    | cDNA, FLJ95666, highly similar to Homo sapiens albumin (ALB), mRNA OS=Homo sapiens OX=9606 PE=2 SV=1                                                                                                | 4                         | 3                       | 22                  | 3                              | 609                | 69.3     | 6.28                  | 60.39                         | 3                                   |
| B2RCM5    | cDNA, FLJ96160, highly similar to Homo sapiens EGF-containing fibulin-like extracellular matrix protein 2 (EFEMP2), mRNA OS=Homo sapiens OX=9606 PE=2 SV=1                                          | 12                        | 4                       | 8                   | 4                              | 443                | 49.3     | 4.94                  | 18.83                         | 4                                   |
| B2RDE1    | cDNA, FLJ96568, highly similar to Homo sapiens tropomyosin 3 (TPM3), mRNA OS=Homo sapiens OX=9606 PE=2 SV=1                                                                                         | 19                        | 5                       | 10                  | 3                              | 248                | 29       | 4.75                  | 24.34                         | 5                                   |
| B2RDW0    | cDNA, FLJ96792, highly similar to Homo sapiens calmodulin 2 (phosphorylase kinase, delta) (CALM2), mRNA OS=Homo sapiens OX=9606 PE=2 SV=1                                                           | 21                        | 2                       | 7                   | 2                              | 149                | 16.8     | 4.22                  | 19.6                          | 2                                   |
| B3KQT9    | Protein disulfide-isomerase OS=Homo sapiens OX=9606 PE=2 SV=1                                                                                                                                       | 24                        | 7                       | 14                  | 7                              | 480                | 54.1     | 7.21                  | 36.04                         | 7                                   |
| B4DDQ2    | Biglycan OS=Homo sapiens OX=9606 PE=2 SV=1                                                                                                                                                          | 40                        | 10                      | 53                  | 10                             | 334                | 37.6     | 7.97                  | 160.6                         | 10                                  |
| B4DE78    | cDNA FLJ52141, highly similar to 14-3-3 protein gamma OS=Homo sapiens OX=9606 PE=2 SV=1                                                                                                             | 12                        | 2                       | 6                   | 1                              | 207                | 23.5     | 4.82                  | 14.13                         | 2                                   |
| B4DID6    | cDNA FLJ52545, highly similar to Dickkopf-related protein 3 OS=Homo sapiens OX=9606 PE=2 SV=1                                                                                                       | 23                        | 5                       | 10                  | 5                              | 364                | 39.8     | 4.67                  | 23.82                         | 5                                   |
| B4DJ30    | cDNA FLJ61290, highly similar to Neutral alpha-glucosidase AB OS=Homo sapiens OX=9606 PE=2 SV=1                                                                                                     | 6                         | 4                       | 6                   | 4                              | 995                | 112.9    | 6.06                  | 15.17                         | 4                                   |
| B4DJI2    | cDNA FLJ53342, highly similar to Granulins OS=Homo sapiens OX=9606 PE=2 SV=1                                                                                                                        | 3                         | 1                       | 1                   | 1                              | 530                | 56.8     | 6.87                  | 3.17                          | 1                                   |
| B4DJI4    | cDNA FLJ58065, highly similar to LIM and SH3 domain protein 1 OS=Homo sapiens OX=9606 PE=2 SV=1                                                                                                     | 12                        | 2                       | 3                   | 2                              | 220                | 24.5     | 8.54                  | 6.54                          | 2                                   |
| B4DLV7    | Rab GDP dissociation inhibitor OS=Homo sapiens OX=9606 PE=2 SV=1                                                                                                                                    | 25                        | 7                       | 9                   | 7                              | 449                | 51.1     | 8.18                  | 20.51                         | 7                                   |
| B4DM79    | cDNA FLJ53848, highly similar to Inter-alpha-trypsin inhibitor heavy chain H2 OS=Homo sapiens OX=9606 PE=2 SV=1                                                                                     | 7                         | 3                       | 9                   | 3                              | 543                | 60.7     | 5.35                  | 24.84                         | 3                                   |
| B4DNG0    | cDNA FLJ58142, highly similar to Olfactomedin-like protein 3 OS=Homo sapiens OX=9606 GN=OLFML3 PE=1 SV=1                                                                                            | 17                        | 4                       | 10                  | 4                              | 345                | 39       | 6.11                  | 27.5                          | 4                                   |
| B4DPH4    | cDNA FLJ58778, highly similar to Plasminogen OS=Homo sapiens OX=9606 PE=2 SV=1                                                                                                                      | 4                         | 1                       | 1                   | 1                              | 407                | 44.9     | 7.46                  | 2.5                           | 1                                   |
| B4DPQ0    | Complement C1r subcomponent OS=Homo sapiens OX=9606 GN=C1R PE=1 SV=1                                                                                                                                | 43                        | 18                      | 60                  | 18                             | 719                | 81.8     | 6.37                  | 189.44                        | 18                                  |
| B4DPW5    | cDNA FLJ59374, highly similar to Homo sapiens caldesmon 1 (CALD1), transcript variant 2, mRNA OS=Homo sapiens OX=9606 PE=2 SV=1                                                                     | 2                         | 1                       | 2                   | 1                              | 497                | 57.4     | 8.22                  | 3.93                          | 1                                   |
| B4DPZ5    | cDNA FLJ53495, highly similar to Polymerase I and transcript release factor OS=Homo sapiens OX=9606 PE=2 SV=1                                                                                       | 5                         | 1                       | 1                   | 1                              | 363                | 40.5     | 5.25                  | 2.85                          | 1                                   |
| B4DRT4    | cDNA FLJ51535, highly similar to Phosphatidylethanolamine-binding protein 1 OS=Homo sapiens OX=9606 PE=2 SV=1                                                                                       | 52                        | 4                       | 9                   | 4                              | 155                | 17.3     | 6                     | 25.34                         | 4                                   |

| Accession | Description                                                                                                                     | Coverage [%] <sup>a</sup> | # Peptides <sup>b</sup> | # PSMs <sup>c</sup> | # Unique Peptides <sup>d</sup> | # AAs <sup>e</sup> | MW [kDa] | Calc. pI <sup>f</sup> | Score Sequest HT <sup>g</sup> | # Peptides: Sequest HT <sup>h</sup> |
|-----------|---------------------------------------------------------------------------------------------------------------------------------|---------------------------|-------------------------|---------------------|--------------------------------|--------------------|----------|-----------------------|-------------------------------|-------------------------------------|
| B4DU16    | cDNA FLJ54550, highly similar to Homo sapiens fibronectin 1 (FN1), transcript variant 6, mRNA OS=Homo sapiens OX=9606 PE=2 SV=1 | 66                        | 35                      | 359                 | 1                              | 894                | 98.1     | 6.24                  | 1160.35                       | 35                                  |
| B4DU62    | cDNA FLJ54154, highly similar to EH-domain-containing protein 2 OS=Homo sapiens OX=9606 PE=2 SV=1                               | 15                        | 2                       | 2                   | 2                              | 185                | 20.6     | 5.08                  | 4.74                          | 2                                   |
| B4DUQ1    | cDNA FLJ54552, highly similar to Heterogeneous nuclear ribonucleoprotein K OS=Homo sapiens OX=9606 PE=2 SV=1                    | 3                         | 1                       | 1                   | 1                              | 439                | 48.5     | 5.92                  | 2.12                          | 1                                   |
| B4DUV1    | Fibulin-1 OS=Homo sapiens OX=9606 PE=2 SV=1                                                                                     | 20                        | 8                       | 15                  | 1                              | 641                | 70.1     | 5.26                  | 40.12                         | 8                                   |
| B4DWC4    | Chloride intracellular channel protein OS=Homo sapiens OX=9606 PE=2 SV=1                                                        | 11                        | 2                       | 2                   | 2                              | 245                | 27.8     | 6.38                  | 4.56                          | 2                                   |
| B4DY85    | cDNA FLJ61463, highly similar to Zyxin OS=Homo sapiens OX=9606 PE=2 SV=1                                                        | 6                         | 2                       | 2                   | 2                              | 516                | 55.4     | 6.06                  | 4.92                          | 2                                   |
| B4E324    | cDNA FLJ60397, highly similar to Lysosomal protective protein OS=Homo sapiens OX=9606 PE=2 SV=1                                 | 3                         | 1                       | 2                   | 1                              | 480                | 54.2     | 6.98                  | 5.02                          | 1                                   |
| B4E3Q1    | cDNA FLJ61580, highly similar to Calsynterin-1 OS=Homo sapiens OX=9606 PE=2 SV=1                                                | 13                        | 8                       | 17                  | 8                              | 962                | 107.7    | 4.97                  | 41.83                         | 8                                   |
| B7Z9B8    | cDNA FLJ56912, highly similar to Fibulin-2 OS=Homo sapiens OX=9606 PE=2 SV=1                                                    | 8                         | 6                       | 8                   | 6                              | 1210               | 129.3    | 4.87                  | 18.24                         | 6                                   |
| B8ZWD1    | Acyl-CoA-binding protein OS=Homo sapiens OX=9606 GN=DBI PE=1 SV=1                                                               | 21                        | 1                       | 1                   | 1                              | 97                 | 11.1     | 8.32                  | 2.97                          | 1                                   |
| B9A025    | Lysyl oxidase homolog 3 OS=Homo sapiens OX=9606 GN=LOXL3 PE=1 SV=1                                                              | 2                         | 1                       | 1                   | 1                              | 586                | 64.8     | 6.62                  | 1.94                          | 1                                   |
| C9J8S2    | Retinoic acid receptor responder protein 2 (Fragment) OS=Homo sapiens OX=9606 GN=RARRES2 PE=1 SV=1                              | 25                        | 2                       | 6                   | 2                              | 159                | 17.8     | 10.21                 | 14.96                         | 2                                   |
| C9JIZ6    | Prosaposin OS=Homo sapiens OX=9606 GN=PSAP PE=1 SV=2                                                                            | 12                        | 4                       | 5                   | 4                              | 527                | 58.4     | 5.17                  | 13.18                         | 4                                   |
| C9JZW3    | Elongation factor 1-beta (Fragment) OS=Homo sapiens OX=9606 GN=EEF1B2 PE=1 SV=1                                                 | 12                        | 1                       | 3                   | 1                              | 123                | 13.4     | 4.56                  | 8.27                          | 1                                   |
| D0PNI1    | Epididymis luminal protein 4 OS=Homo sapiens OX=9606 GN=YWHAZ PE=2 SV=1                                                         | 29                        | 5                       | 13                  | 4                              | 245                | 27.7     | 4.79                  | 33.53                         | 5                                   |
| D0PNI2    | Lysyl oxidase OS=Homo sapiens OX=9606 GN=LOX PE=4 SV=1                                                                          | 8                         | 3                       | 4                   | 3                              | 417                | 46.9     | 8.09                  | 8.91                          | 3                                   |
| D1MGQ2    | Alpha-2 globin chain OS=Homo sapiens OX=9606 GN=HBA2 PE=3 SV=1                                                                  | 22                        | 2                       | 8                   | 2                              | 142                | 15.2     | 8.68                  | 24.27                         | 2                                   |
| D3DT71    | Collagen, type XI, alpha 1, isoform CRA_b OS=Homo sapiens OX=9606 GN=COL11A1 PE=4 SV=1                                          | 3                         | 3                       | 13                  | 1                              | 1767               | 176.5    | 5.38                  | 37.35                         | 3                                   |
| D3DTX7    | Collagen, type I, alpha 1, isoform CRA_a OS=Homo sapiens OX=9606 GN=COL1A1 PE=4 SV=1                                            | 67                        | 33                      | 397                 | 2                              | 885                | 84.7     | 6.24                  | 1265.77                       | 33                                  |
| D3YTG3    | Target of Nesh-SH3 OS=Homo sapiens OX=9606 GN=ABI3BP PE=1 SV=1                                                                  | 6                         | 8                       | 15                  | 8                              | 1777               | 195.2    | 9.73                  | 32.98                         | 8                                   |
| D6RD99    | Scrapie-responsive protein 1 OS=Homo sapiens OX=9606 GN=SCRG1 PE=1 SV=1                                                         | 51                        | 2                       | 3                   | 2                              | 92                 | 10.5     | 7.31                  | 8.31                          | 2                                   |
| D6RF35    | Vitamin D-binding protein OS=Homo sapiens OX=9606 GN=GC PE=1 SV=1                                                               | 8                         | 2                       | 5                   | 2                              | 476                | 53       | 5.52                  | 17.1                          | 2                                   |
| D9ZGF2    | Collagen, type VI, alpha 3 OS=Homo sapiens OX=9606 GN=COL6A3 PE=4 SV=1                                                          | 22                        | 44                      | 85                  | 44                             | 3177               | 343.5    | 6.68                  | 223.9                         | 44                                  |
| D9ZGG2    | Vitronectin OS=Homo sapiens OX=9606 GN=VTN PE=4 SV=1                                                                            | 3                         | 1                       | 3                   | 1                              | 478                | 54.3     | 5.8                   | 7.18                          | 1                                   |
| E7EUF1    | Ectonucleotide pyrophosphatase/phosphodiesterase family member 2 OS=Homo sapiens OX=9606 GN=ENPP2 PE=1 SV=1                     | 14                        | 8                       | 17                  | 8                              | 884                | 101.5    | 7.53                  | 45.94                         | 8                                   |
| E9PL57    | NEDD8-MDP1 readthrough (Fragment) OS=Homo sapiens OX=9606 GN=NEDD8-MDP1 PE=4 SV=1                                               | 8                         | 1                       | 1                   | 1                              | 170                | 19.5     | 7.43                  | 1.95                          | 1                                   |
| E9PL83    | ADM OS=Homo sapiens OX=9606 GN=ADM PE=1 SV=1                                                                                    | 20                        | 2                       | 4                   | 2                              | 138                | 15       | 10.76                 | 11.16                         | 2                                   |
| E9PRR2    | Serine protease 23 (Fragment) OS=Homo sapiens OX=9606 GN=PRSS23 PE=1 SV=1                                                       | 13                        | 1                       | 4                   | 1                              | 154                | 16.9     | 8.82                  | 10.92                         | 1                                   |

| Accession | Description                                                                                                  | Coverage [%] <sup>a</sup> | # Peptides <sup>b</sup> | # PSMs <sup>c</sup> | # Unique Peptides <sup>d</sup> | # AAs <sup>e</sup> | MW [kDa] | Calc. pI <sup>f</sup> | Score Sequest HT <sup>g</sup> | # Peptides: Sequest HT <sup>h</sup> |
|-----------|--------------------------------------------------------------------------------------------------------------|---------------------------|-------------------------|---------------------|--------------------------------|--------------------|----------|-----------------------|-------------------------------|-------------------------------------|
| F5GXS0    | Complement C4-B OS=Homo sapiens OX=9606 GN=C4B PE=1 SV=1                                                     | 1                         | 1                       | 1                   | 1                              | 1698               | 187.6    | 7.33                  | 1.93                          | 1                                   |
| F5H365    | Protein transport protein SEC23 OS=Homo sapiens OX=9606 GN=SEC23A PE=1 SV=1                                  | 4                         | 2                       | 2                   | 2                              | 736                | 82.9     | 7.46                  | 4.77                          | 2                                   |
| F8VR42    | Dynein regulatory complex subunit 2 (Fragment) OS=Homo sapiens OX=9606 GN=CCDC65 PE=1 SV=1                   | 3                         | 1                       | 1                   | 1                              | 373                | 44       | 9.25                  | 2.05                          | 1                                   |
| F8VR50    | Actin-related protein 2/3 complex subunit 3 (Fragment) OS=Homo sapiens OX=9606 GN=ARPC3 PE=1 SV=1            | 13                        | 1                       | 2                   | 1                              | 84                 | 9.7      | 7.93                  | 4.08                          | 1                                   |
| F8VSC5    | SCY1-like protein 2 (Fragment) OS=Homo sapiens OX=9606 GN=SCYL2 PE=1 SV=1                                    | 3                         | 1                       | 1                   | 1                              | 681                | 77       | 7.05                  | 1.91                          | 1                                   |
| F8W6I7    | Heterogeneous nuclear ribonucleoprotein A1 OS=Homo sapiens OX=9606 GN=HNRNPA1 PE=1 SV=2                      | 8                         | 2                       | 4                   | 2                              | 307                | 33.1     | 9.13                  | 9.48                          | 2                                   |
| F8W809    | Thioredoxin reductase 1, cytoplasmic OS=Homo sapiens OX=9606 GN=TXNRD1 PE=1 SV=1                             | 17                        | 5                       | 10                  | 5                              | 498                | 54.6     | 6.47                  | 26.62                         | 5                                   |
| F8W9U3    | Protein ABHD14B OS=Homo sapiens OX=9606 GN=ABHD14B PE=1 SV=1                                                 | 11                        | 1                       | 1                   | 1                              | 208                | 22.4     | 6.52                  | 2.96                          | 1                                   |
| G3V279    | Enhancer of rudimentary homolog OS=Homo sapiens OX=9606 GN=ERH PE=1 SV=1                                     | 17                        | 1                       | 3                   | 1                              | 71                 | 8.2      | 4.7                   | 7.21                          | 1                                   |
| G3V3E8    | NPC intracellular cholesterol transporter 2 OS=Homo sapiens OX=9606 GN=NPC2 PE=1 SV=1                        | 22                        | 2                       | 2                   | 2                              | 174                | 19.2     | 8.44                  | 4.63                          | 2                                   |
| G3V4U0    | Fibulin-5 OS=Homo sapiens OX=9606 GN=FBLN5 PE=1 SV=1                                                         | 9                         | 3                       | 3                   | 3                              | 453                | 50.8     | 4.77                  | 7.42                          | 3                                   |
| H0YEA7    | N-acetylglucosamine-1-phosphotransferase subunit gamma (Fragment) OS=Homo sapiens OX=9606 GN=GNPTG PE=1 SV=8 | 8                         | 1                       | 1                   | 1                              | 184                | 20.2     | 9.11                  | 3.61                          | 1                                   |
| H0YGS3    | Microfibrillar-associated protein 5 (Fragment) OS=Homo sapiens OX=9606 GN=MFAP5 PE=1 SV=1                    | 34                        | 2                       | 11                  | 2                              | 79                 | 9.4      | 9.47                  | 33.25                         | 2                                   |
| H7BZJ3    | Protein disulfide-isomerase A3 (Fragment) OS=Homo sapiens OX=9606 GN=PDIA3 PE=1 SV=1                         | 11                        | 1                       | 2                   | 1                              | 123                | 13.5     | 7.3                   | 4.81                          | 1                                   |
| H7C0V9    | Amyloid-beta A4 protein (Fragment) OS=Homo sapiens OX=9606 GN=APP PE=1 SV=1                                  | 2                         | 1                       | 2                   | 1                              | 485                | 55.1     | 4.82                  | 5.11                          | 1                                   |
| H7C3F9    | Arp2/3 complex 34 kDa subunit (Fragment) OS=Homo sapiens OX=9606 GN=ARPC2 PE=1 SV=1                          | 7                         | 1                       | 2                   | 1                              | 165                | 18.6     | 9.41                  | 4.53                          | 1                                   |
| I4AY87    | Macrophage migration inhibitory factor (Fragment) OS=Homo sapiens OX=9606 GN=MIF PE=1 SV=1                   | 18                        | 2                       | 5                   | 2                              | 115                | 12.5     | 7.88                  | 11.56                         | 2                                   |
| K4RH61    | Matrix metalloproteinase 14 (Membrane-inserted) OS=Homo sapiens OX=9606 GN=MMP14 PE=2 SV=1                   | 2                         | 1                       | 2                   | 1                              | 582                | 65.9     | 7.97                  | 4.14                          | 1                                   |
| K7ERZ3    | Perilipin-3 (Fragment) OS=Homo sapiens OX=9606 GN=PLIN3 PE=1 SV=1                                            | 16                        | 2                       | 2                   | 2                              | 292                | 32       | 5.14                  | 4.8                           | 2                                   |
| K9MS24    | Spectrin beta chain OS=Homo sapiens OX=9606 GN=SPTBN1 PE=2 SV=1                                              | 1                         | 2                       | 3                   | 2                              | 2364               | 274.2    | 5.55                  | 7.17                          | 2                                   |
| M0R1V7    | Ubiquitin-60S ribosomal protein L40 (Fragment) OS=Homo sapiens OX=9606 GN=UBA52 PE=1 SV=1                    | 25                        | 1                       | 1                   | 1                              | 63                 | 7.1      | 5.36                  | 2.62                          | 1                                   |
| O00391    | Sulfhydryl oxidase 1 OS=Homo sapiens OX=9606 GN=QSOX1 PE=1 SV=3                                              | 32                        | 17                      | 39                  | 17                             | 747                | 82.5     | 8.92                  | 112.91                        | 17                                  |
| O00462    | Beta-mannosidase OS=Homo sapiens OX=9606 GN=MANBA PE=2 SV=3                                                  | 1                         | 1                       | 1                   | 1                              | 879                | 100.8    | 5.52                  | 2.24                          | 1                                   |
| O14950    | Myosin regulatory light chain 12B OS=Homo sapiens OX=9606 GN=MYL12B PE=1 SV=2                                | 22                        | 3                       | 5                   | 3                              | 172                | 19.8     | 4.84                  | 12.54                         | 3                                   |
| O60565    | Gremlin-1 OS=Homo sapiens OX=9606 GN=GREM1 PE=1 SV=1                                                         | 7                         | 1                       | 3                   | 1                              | 184                | 20.7     | 9.39                  | 6.84                          | 1                                   |
| O76076    | WNT1-inducible-signaling pathway protein 2 OS=Homo sapiens OX=9606 GN=WISP2 PE=1 SV=1                        | 7                         | 1                       | 1                   | 1                              | 250                | 26.8     | 7.88                  | 2.03                          | 1                                   |
| P00338    | L-lactate dehydrogenase A chain OS=Homo sapiens OX=9606 GN=LDHA PE=1 SV=2                                    | 31                        | 6                       | 14                  | 6                              | 332                | 36.7     | 8.27                  | 39.25                         | 6                                   |
| P00441    | Superoxide dismutase [Cu-Zn] OS=Homo sapiens OX=9606 GN=SOD1 PE=1 SV=2                                       | 45                        | 3                       | 8                   | 3                              | 154                | 15.9     | 6.13                  | 34.28                         | 3                                   |

| Accession | Description                                                                         | Coverage [%] <sup>a</sup> | # Peptides <sup>b</sup> | # PSMs <sup>c</sup> | # Unique Peptides <sup>d</sup> | # AAs <sup>e</sup> | MW [kDa] | Calc. pI <sup>f</sup> | Score Sequest HT <sup>g</sup> | # Peptides: Sequest HT <sup>h</sup> |
|-----------|-------------------------------------------------------------------------------------|---------------------------|-------------------------|---------------------|--------------------------------|--------------------|----------|-----------------------|-------------------------------|-------------------------------------|
| P01023    | Alpha-2-macroglobulin OS=Homo sapiens OX=9606 GN=A2M PE=1 SV=3                      | 3                         | 4                       | 8                   | 2                              | 1474               | 163.2    | 6.46                  | 18.84                         | 4                                   |
| P01024    | Complement C3 OS=Homo sapiens OX=9606 GN=C3 PE=1 SV=2                               | 2                         | 3                       | 5                   | 3                              | 1663               | 187      | 6.4                   | 10.15                         | 3                                   |
| P01033    | Metalloproteinase inhibitor 1 OS=Homo sapiens OX=9606 GN=TIMP1 PE=1 SV=1            | 54                        | 7                       | 55                  | 7                              | 207                | 23.2     | 8.1                   | 187.32                        | 7                                   |
| P01034    | Cystatin-C OS=Homo sapiens OX=9606 GN=CST3 PE=1 SV=1                                | 56                        | 6                       | 15                  | 6                              | 146                | 15.8     | 8.75                  | 40.6                          | 6                                   |
| P02452    | Collagen alpha-1(I) chain OS=Homo sapiens OX=9606 GN=COL1A1 PE=1 SV=5               | 59                        | 45                      | 462                 | 14                             | 1464               | 138.9    | 5.8                   | 1476.19                       | 45                                  |
| P02461    | Collagen alpha-1(III) chain OS=Homo sapiens OX=9606 GN=COL3A1 PE=1 SV=4             | 41                        | 32                      | 157                 | 32                             | 1466               | 138.5    | 6.61                  | 470.42                        | 32                                  |
| P02462    | Collagen alpha-1(IV) chain OS=Homo sapiens OX=9606 GN=COL4A1 PE=1 SV=4              | 6                         | 5                       | 12                  | 5                              | 1669               | 160.5    | 8.28                  | 36.22                         | 5                                   |
| P02545    | Prelamin-A/C OS=Homo sapiens OX=9606 GN=LMNA PE=1 SV=1                              | 26                        | 12                      | 22                  | 12                             | 664                | 74.1     | 7.02                  | 58.49                         | 12                                  |
| P02647    | Apolipoprotein A-I OS=Homo sapiens OX=9606 GN=APOA1 PE=1 SV=1                       | 6                         | 1                       | 4                   | 1                              | 267                | 30.8     | 5.76                  | 10.71                         | 1                                   |
| P04083    | Annexin A1 OS=Homo sapiens OX=9606 GN=ANXA1 PE=1 SV=2                               | 16                        | 4                       | 7                   | 4                              | 346                | 38.7     | 7.02                  | 16.01                         | 4                                   |
| P04406    | Glyceraldehyde-3-phosphate dehydrogenase OS=Homo sapiens OX=9606 GN=GAPDH PE=1 SV=3 | 42                        | 8                       | 17                  | 8                              | 335                | 36       | 8.46                  | 46.02                         | 8                                   |
| P04792    | Heat shock protein beta-1 OS=Homo sapiens OX=9606 GN=HSPB1 PE=1 SV=2                | 28                        | 3                       | 5                   | 3                              | 205                | 22.8     | 6.4                   | 10.5                          | 3                                   |
| P05387    | 60S acidic ribosomal protein P2 OS=Homo sapiens OX=9606 GN=RPLP2 PE=1 SV=1          | 17                        | 1                       | 1                   | 1                              | 115                | 11.7     | 4.54                  | 2.51                          | 1                                   |
| P05388    | 60S acidic ribosomal protein P0 OS=Homo sapiens OX=9606 GN=RPLP0 PE=1 SV=1          | 7                         | 1                       | 1                   | 1                              | 317                | 34.3     | 5.97                  | 1.91                          | 1                                   |
| P05997    | Collagen alpha-2(V) chain OS=Homo sapiens OX=9606 GN=COL5A2 PE=1 SV=3               | 37                        | 26                      | 72                  | 26                             | 1499               | 144.8    | 6.46                  | 205.56                        | 26                                  |
| P07585    | Decorin OS=Homo sapiens OX=9606 GN=DCN PE=1 SV=1                                    | 41                        | 10                      | 63                  | 10                             | 359                | 39.7     | 8.54                  | 196.21                        | 10                                  |
| P07737    | Profilin-1 OS=Homo sapiens OX=9606 GN=PFN1 PE=1 SV=2                                | 50                        | 5                       | 13                  | 5                              | 140                | 15       | 8.27                  | 34.03                         | 5                                   |
| P07942    | Laminin subunit beta-1 OS=Homo sapiens OX=9606 GN=LAMB1 PE=1 SV=2                   | 13                        | 15                      | 18                  | 15                             | 1786               | 197.9    | 4.94                  | 43.2                          | 15                                  |
| P07996    | Thrombospondin-1 OS=Homo sapiens OX=9606 GN=THBS1 PE=1 SV=2                         | 24                        | 20                      | 34                  | 18                             | 1170               | 129.3    | 4.94                  | 88.74                         | 20                                  |
| P08670    | Vimentin OS=Homo sapiens OX=9606 GN=VIM PE=1 SV=4                                   | 36                        | 16                      | 77                  | 16                             | 466                | 53.6     | 5.12                  | 214.67                        | 16                                  |
| P09382    | Galectin-1 OS=Homo sapiens OX=9606 GN=LGALS1 PE=1 SV=2                              | 54                        | 4                       | 19                  | 4                              | 135                | 14.7     | 5.5                   | 54.09                         | 4                                   |
| P09486    | SPARC OS=Homo sapiens OX=9606 GN=SPARC PE=1 SV=1                                    | 56                        | 14                      | 200                 | 14                             | 303                | 34.6     | 4.84                  | 659.54                        | 14                                  |
| P09871    | Complement C1s subcomponent OS=Homo sapiens OX=9606 GN=C1S PE=1 SV=1                | 39                        | 16                      | 50                  | 16                             | 688                | 76.6     | 4.96                  | 148.19                        | 16                                  |
| P10599    | Thioredoxin OS=Homo sapiens OX=9606 GN=TXN PE=1 SV=3                                | 12                        | 1                       | 4                   | 1                              | 105                | 11.7     | 4.92                  | 10.27                         | 1                                   |
| P10909    | Clusterin OS=Homo sapiens OX=9606 GN=CLU PE=1 SV=1                                  | 22                        | 7                       | 20                  | 4                              | 449                | 52.5     | 6.27                  | 51.45                         | 7                                   |
| P11047    | Laminin subunit gamma-1 OS=Homo sapiens OX=9606 GN=LAMC1 PE=1 SV=3                  | 18                        | 18                      | 25                  | 18                             | 1609               | 177.5    | 5.12                  | 64.28                         | 18                                  |
| P12110    | Collagen alpha-2(VI) chain OS=Homo sapiens OX=9606 GN=COL6A2 PE=1 SV=4              | 25                        | 15                      | 47                  | 8                              | 1019               | 108.5    | 6.21                  | 141.92                        | 15                                  |
| P13497    | Bone morphogenetic protein 1 OS=Homo sapiens OX=9606 GN=BMP1 PE=1 SV=2              | 5                         | 3                       | 5                   | 3                              | 986                | 111.2    | 6.9                   | 11.38                         | 3                                   |



| Accession | Description                                                                                        | Coverage [%] <sup>a</sup> | # Peptides <sup>b</sup> | # PSMs <sup>c</sup> | # Unique Peptides <sup>d</sup> | # AAs <sup>e</sup> | MW [kDa] | Calc. pI <sup>f</sup> | Score Sequest HT <sup>g</sup> | # Peptides: Sequest HT <sup>h</sup> |
|-----------|----------------------------------------------------------------------------------------------------|---------------------------|-------------------------|---------------------|--------------------------------|--------------------|----------|-----------------------|-------------------------------|-------------------------------------|
| P14543    | Nidogen-1 OS=Homo sapiens OX=9606 GN=NID1 PE=1 SV=3                                                | 21                        | 17                      | 35                  | 17                             | 1247               | 136.3    | 5.29                  | 88.67                         | 17                                  |
| P16870    | Carboxypeptidase E OS=Homo sapiens OX=9606 GN=CPE PE=1 SV=1                                        | 10                        | 3                       | 3                   | 3                              | 476                | 53.1     | 5.14                  | 7.06                          | 3                                   |
| P18206    | Vinculin OS=Homo sapiens OX=9606 GN=VCL PE=1 SV=4                                                  | 17                        | 14                      | 25                  | 14                             | 1134               | 123.7    | 5.66                  | 58.52                         | 14                                  |
| P19022    | Cadherin-2 OS=Homo sapiens OX=9606 GN=CDH2 PE=1 SV=4                                               | 7                         | 5                       | 7                   | 5                              | 906                | 99.7     | 4.81                  | 16.75                         | 5                                   |
| P21333    | Filamin-A OS=Homo sapiens OX=9606 GN=FLNA PE=1 SV=4                                                | 24                        | 40                      | 74                  | 38                             | 2647               | 280.6    | 6.06                  | 190.97                        | 40                                  |
| P24592    | Insulin-like growth factor-binding protein 6 OS=Homo sapiens OX=9606 GN=IGFBP6 PE=1 SV=1           | 34                        | 3                       | 14                  | 3                              | 240                | 25.3     | 7.81                  | 46.75                         | 3                                   |
| P25787    | Proteasome subunit alpha type-2 OS=Homo sapiens OX=9606 GN=PSMA2 PE=1 SV=2                         | 6                         | 1                       | 3                   | 1                              | 234                | 25.9     | 7.43                  | 8.08                          | 1                                   |
| P25940    | Collagen alpha-3(V) chain OS=Homo sapiens OX=9606 GN=COL5A3 PE=1 SV=3                              | 8                         | 7                       | 15                  | 7                              | 1745               | 172      | 6.87                  | 37.52                         | 7                                   |
| P26022    | Pentraxin-related protein PTX3 OS=Homo sapiens OX=9606 GN=PTX3 PE=1 SV=3                           | 43                        | 12                      | 48                  | 12                             | 381                | 41.9     | 5.01                  | 131.74                        | 12                                  |
| P26038    | Moesin OS=Homo sapiens OX=9606 GN=MSN PE=1 SV=3                                                    | 13                        | 8                       | 16                  | 8                              | 577                | 67.8     | 6.4                   | 39.72                         | 8                                   |
| P30041    | Peroxiredoxin-6 OS=Homo sapiens OX=9606 GN=PRDX6 PE=1 SV=3                                         | 24                        | 4                       | 5                   | 4                              | 224                | 25       | 6.38                  | 11.2                          | 4                                   |
| P30044    | Peroxiredoxin-5, mitochondrial OS=Homo sapiens OX=9606 GN=PRDX5 PE=1 SV=4                          | 8                         | 1                       | 1                   | 1                              | 214                | 22.1     | 8.7                   | 2.48                          | 1                                   |
| P30046    | D-dopachrome decarboxylase OS=Homo sapiens OX=9606 GN=DDT PE=1 SV=3                                | 12                        | 1                       | 2                   | 1                              | 118                | 12.7     | 7.3                   | 4.08                          | 1                                   |
| P30048    | Thioredoxin-dependent peroxide reductase, mitochondrial OS=Homo sapiens OX=9606 GN=PRDX3 PE=1 SV=3 | 10                        | 2                       | 4                   | 2                              | 256                | 27.7     | 7.78                  | 10.79                         | 2                                   |
| P30050    | 60S ribosomal protein L12 OS=Homo sapiens OX=9606 GN=RPL12 PE=1 SV=1                               | 19                        | 2                       | 3                   | 2                              | 165                | 17.8     | 9.42                  | 6.56                          | 2                                   |
| P30530    | Tyrosine-protein kinase receptor UFO OS=Homo sapiens OX=9606 GN=AXL PE=1 SV=4                      | 2                         | 1                       | 1                   | 1                              | 894                | 98.3     | 5.39                  | 2.28                          | 1                                   |
| P31946    | 14-3-3 protein beta/alpha OS=Homo sapiens OX=9606 GN=YWHAB PE=1 SV=3                               | 9                         | 2                       | 4                   | 1                              | 246                | 28.1     | 4.83                  | 8.63                          | 2                                   |
| P35237    | Serpin B6 OS=Homo sapiens OX=9606 GN=SERPINB6 PE=1 SV=3                                            | 13                        | 3                       | 3                   | 3                              | 376                | 42.6     | 5.27                  | 6.35                          | 3                                   |
| P35442    | Thrombospondin-2 OS=Homo sapiens OX=9606 GN=THBS2 PE=1 SV=2                                        | 11                        | 9                       | 15                  | 7                              | 1172               | 129.9    | 4.83                  | 36.61                         | 9                                   |
| P35527    | Keratin, type I cytoskeletal 9 OS=Homo sapiens OX=9606 GN=KRT9 PE=1 SV=3                           | 6                         | 2                       | 2                   | 2                              | 623                | 62       | 5.24                  | 4.97                          | 2                                   |
| P35555    | Fibrillin-1 OS=Homo sapiens OX=9606 GN=FBN1 PE=1 SV=3                                              | 19                        | 37                      | 86                  | 37                             | 2871               | 312      | 4.93                  | 234.4                         | 37                                  |
| P36955    | Pigment epithelium-derived factor OS=Homo sapiens OX=9606 GN=SERPINF1 PE=1 SV=4                    | 39                        | 12                      | 39                  | 12                             | 418                | 46.3     | 6.38                  | 105.4                         | 12                                  |
| P40925    | Malate dehydrogenase, cytoplasmic OS=Homo sapiens OX=9606 GN=MDH1 PE=1 SV=4                        | 13                        | 3                       | 5                   | 3                              | 334                | 36.4     | 7.36                  | 12.85                         | 3                                   |
| P48061    | Stromal cell-derived factor 1 OS=Homo sapiens OX=9606 GN=CXCL12 PE=1 SV=1                          | 15                        | 1                       | 2                   | 1                              | 93                 | 10.7     | 9.88                  | 6.49                          | 1                                   |
| P50454    | Serpin H1 OS=Homo sapiens OX=9606 GN=SERPINH1 PE=1 SV=2                                            | 41                        | 14                      | 32                  | 14                             | 418                | 46.4     | 8.69                  | 87.01                         | 14                                  |
| P51884    | Lumican OS=Homo sapiens OX=9606 GN=LUM PE=1 SV=2                                                   | 35                        | 10                      | 66                  | 10                             | 338                | 38.4     | 6.61                  | 196.31                        | 10                                  |
| P55072    | Transitional endoplasmic reticulum ATPase OS=Homo sapiens OX=9606 GN=VCP PE=1 SV=4                 | 12                        | 4                       | 7                   | 4                              | 806                | 89.3     | 5.26                  | 21.11                         | 4                                   |
| P55083    | Microfibril-associated glycoprotein 4 OS=Homo sapiens OX=9606 GN=MFAP4 PE=1 SV=2                   | 15                        | 2                       | 15                  | 2                              | 255                | 28.6     | 5.63                  | 47.03                         | 2                                   |

| Accession | Description                                                                                         | Coverage [%] <sup>a</sup> | # Peptides <sup>b</sup> | # PSMs <sup>c</sup> | # Unique Peptides <sup>d</sup> | # AAs <sup>e</sup> | MW [kDa] | Calc. pI <sup>f</sup> | Score Sequest HT <sup>g</sup> | # Peptides: Sequest HT <sup>h</sup> |
|-----------|-----------------------------------------------------------------------------------------------------|---------------------------|-------------------------|---------------------|--------------------------------|--------------------|----------|-----------------------|-------------------------------|-------------------------------------|
| P55290    | Cadherin-13 OS=Homo sapiens OX=9606 GN=CDH13 PE=1 SV=1                                              | 6                         | 3                       | 4                   | 3                              | 713                | 78.2     | 4.98                  | 10.08                         | 3                                   |
| P62857    | 40S ribosomal protein S28 OS=Homo sapiens OX=9606 GN=RPS28 PE=1 SV=1                                | 17                        | 1                       | 2                   | 1                              | 69                 | 7.8      | 10.7                  | 4.62                          | 1                                   |
| P62937    | Peptidyl-prolyl cis-trans isomerase A OS=Homo sapiens OX=9606 GN=PPIA PE=1 SV=2                     | 36                        | 3                       | 6                   | 3                              | 165                | 18       | 7.81                  | 16.12                         | 3                                   |
| P62942    | Peptidyl-prolyl cis-trans isomerase FKBP1A OS=Homo sapiens OX=9606 GN=FKBP1A PE=1 SV=2              | 26                        | 2                       | 5                   | 2                              | 108                | 11.9     | 8.16                  | 12.55                         | 2                                   |
| P63261    | Actin, cytoplasmic 2 OS=Homo sapiens OX=9606 GN=ACTG1 PE=1 SV=1                                     | 53                        | 12                      | 67                  | 1                              | 375                | 41.8     | 5.48                  | 204.66                        | 12                                  |
| P63313    | Thymosin beta-10 OS=Homo sapiens OX=9606 GN=TMSB10 PE=1 SV=2                                        | 34                        | 1                       | 3                   | 1                              | 44                 | 5        | 5.36                  | 10.47                         | 1                                   |
| P67936    | Tropomyosin alpha-4 chain OS=Homo sapiens OX=9606 GN=TPM4 PE=1 SV=3                                 | 34                        | 9                       | 19                  | 4                              | 248                | 28.5     | 4.69                  | 42.53                         | 9                                   |
| P78539    | Sushi repeat-containing protein SRPX OS=Homo sapiens OX=9606 GN=SRPX PE=1 SV=1                      | 3                         | 1                       | 1                   | 1                              | 464                | 51.5     | 8.66                  | 1.9                           | 1                                   |
| P80303    | Nucleobindin-2 OS=Homo sapiens OX=9606 GN=NUCB2 PE=1 SV=3                                           | 3                         | 1                       | 1                   | 1                              | 420                | 50.2     | 5.12                  | 2.46                          | 1                                   |
| Q01995    | Transgelin OS=Homo sapiens OX=9606 GN=TAGLN PE=1 SV=4                                               | 39                        | 6                       | 17                  | 6                              | 201                | 22.6     | 8.84                  | 44.55                         | 6                                   |
| Q04760    | Lactoylglutathione lyase OS=Homo sapiens OX=9606 GN=GLO1 PE=1 SV=4                                  | 9                         | 1                       | 2                   | 1                              | 184                | 20.8     | 5.31                  | 7.31                          | 1                                   |
| Q05DH1    | Proteasome subunit alpha type (Fragment) OS=Homo sapiens OX=9606 GN=PSMA7 PE=2 SV=1                 | 5                         | 1                       | 2                   | 1                              | 238                | 26.7     | 8.87                  | 4.04                          | 1                                   |
| Q06830    | Peroxiredoxin-1 OS=Homo sapiens OX=9606 GN=PRDX1 PE=1 SV=1                                          | 36                        | 5                       | 10                  | 5                              | 199                | 22.1     | 8.13                  | 23.24                         | 5                                   |
| Q07954    | Prolow-density lipoprotein receptor-related protein 1 OS=Homo sapiens OX=9606 GN=LRP1 PE=1 SV=2     | 1                         | 3                       | 3                   | 3                              | 4544               | 504.3    | 5.39                  | 7.78                          | 3                                   |
| Q08629    | Testican-1 OS=Homo sapiens OX=9606 GN=SPOCK1 PE=1 SV=1                                              | 21                        | 6                       | 8                   | 6                              | 439                | 49.1     | 6.1                   | 20.71                         | 6                                   |
| Q09666    | Neuroblast differentiation-associated protein AHNAK OS=Homo sapiens OX=9606 GN=AHNAK PE=1 SV=2      | 6                         | 13                      | 18                  | 13                             | 5890               | 628.7    | 6.15                  | 41.12                         | 13                                  |
| Q0Z944    | Beta globin (Fragment) OS=Homo sapiens OX=9606 GN=HBB PE=3 SV=1                                     | 10                        | 1                       | 5                   | 1                              | 105                | 11.5     | 6.37                  | 11.58                         | 1                                   |
| Q12841    | Follistatin-related protein 1 OS=Homo sapiens OX=9606 GN=FSTL1 PE=1 SV=1                            | 40                        | 10                      | 79                  | 10                             | 308                | 35       | 5.52                  | 238.97                        | 10                                  |
| Q14315    | Filamin-C OS=Homo sapiens OX=9606 GN=FLNC PE=1 SV=3                                                 | 4                         | 7                       | 14                  | 5                              | 2725               | 290.8    | 5.97                  | 35.06                         | 7                                   |
| Q14767    | Latent-transforming growth factor beta-binding protein 2 OS=Homo sapiens OX=9606 GN=LTBP2 PE=1 SV=3 | 4                         | 5                       | 12                  | 5                              | 1821               | 194.9    | 5.19                  | 29.81                         | 5                                   |
| Q15019    | Septin-2 OS=Homo sapiens OX=9606 GN=SEPT2 PE=1 SV=1                                                 | 6                         | 1                       | 1                   | 1                              | 361                | 41.5     | 6.6                   | 2.7                           | 1                                   |
| Q15063-5  | Isoform 5 of Periostin OS=Homo sapiens OX=9606 GN=POSTN                                             | 57                        | 31                      | 221                 | 4                              | 809                | 90.4     | 7.39                  | 732.85                        | 31                                  |
| Q15084    | Protein disulfide-isomerase A6 OS=Homo sapiens OX=9606 GN=PDIA6 PE=1 SV=1                           | 17                        | 5                       | 9                   | 5                              | 440                | 48.1     | 5.08                  | 21.31                         | 5                                   |
| Q15149    | Plectin OS=Homo sapiens OX=9606 GN=PLEC PE=1 SV=3                                                   | 2                         | 7                       | 10                  | 7                              | 4684               | 531.5    | 5.96                  | 22.77                         | 7                                   |
| Q15293    | Reticulocalbin-1 OS=Homo sapiens OX=9606 GN=RCN1 PE=1 SV=1                                          | 22                        | 5                       | 9                   | 5                              | 331                | 38.9     | 5                     | 24.86                         | 5                                   |
| Q15582    | Transforming growth factor-beta-induced protein ig-h3 OS=Homo sapiens OX=9606 GN=TGFB1 PE=1 SV=1    | 54                        | 21                      | 169                 | 21                             | 683                | 74.6     | 7.71                  | 536.55                        | 21                                  |
| Q16270    | Insulin-like growth factor-binding protein 7 OS=Homo sapiens OX=9606 GN=IGFBP7 PE=1 SV=1            | 37                        | 8                       | 36                  | 8                              | 282                | 29.1     | 7.9                   | 102.62                        | 8                                   |
| Q16658    | Fascin OS=Homo sapiens OX=9606 GN=FSCN1 PE=1 SV=3                                                   | 5                         | 2                       | 3                   | 2                              | 493                | 54.5     | 7.24                  | 8.55                          | 2                                   |

| Accession | Description                                                                                                                     | Coverage [%] <sup>a</sup> | # Peptides <sup>b</sup> | # PSMs <sup>c</sup> | # Unique Peptides <sup>d</sup> | # AAs <sup>e</sup> | MW [kDa] | Calc. pI <sup>f</sup> | Score Sequest HT <sup>g</sup> | # Peptides: Sequest HT <sup>h</sup> |
|-----------|---------------------------------------------------------------------------------------------------------------------------------|---------------------------|-------------------------|---------------------|--------------------------------|--------------------|----------|-----------------------|-------------------------------|-------------------------------------|
| Q16777    | Histone H2A type 2-C OS=Homo sapiens OX=9606 GN=HIST2H2AC PE=1 SV=4                                                             | 22                        | 2                       | 3                   | 2                              | 129                | 14       | 10.9                  | 6.41                          | 2                                   |
| Q16778    | Histone H2B type 2-E OS=Homo sapiens OX=9606 GN=HIST2H2BE PE=1 SV=3                                                             | 12                        | 1                       | 2                   | 1                              | 126                | 13.9     | 10.32                 | 5.85                          | 1                                   |
| Q2HIZ0    | Thrombospondin 3 OS=Homo sapiens OX=9606 GN=THBS3 PE=2 SV=1                                                                     | 3                         | 1                       | 1                   | 1                              | 956                | 104.1    | 4.65                  | 2.31                          | 1                                   |
| Q4LDE5    | Sushi, von Willebrand factor type A, EGF and pentraxin domain-containing protein 1 OS=Homo sapiens OX=9606 GN=SVEP1 PE=1 SV=3   | 5                         | 11                      | 17                  | 11                             | 3571               | 389.9    | 5.5                   | 38.31                         | 11                                  |
| Q53FA4    | Cysteine-rich, angiogenic inducer, 61 variant (Fragment) OS=Homo sapiens OX=9606 PE=2 SV=1                                      | 12                        | 2                       | 3                   | 2                              | 381                | 42       | 8.31                  | 9.25                          | 2                                   |
| Q53FA7    | Quinone oxidoreductase PIG3 OS=Homo sapiens OX=9606 GN=TP53I3 PE=1 SV=2                                                         | 4                         | 1                       | 2                   | 1                              | 332                | 35.5     | 7.17                  | 4.73                          | 1                                   |
| Q53G71    | Calreticulin variant (Fragment) OS=Homo sapiens OX=9606 PE=2 SV=1                                                               | 9                         | 2                       | 3                   | 2                              | 406                | 46.9     | 4.45                  | 7.22                          | 2                                   |
| Q53G99    | Beta actin variant (Fragment) OS=Homo sapiens OX=9606 PE=2 SV=1                                                                 | 53                        | 12                      | 68                  | 1                              | 375                | 41.7     | 5.59                  | 206.12                        | 12                                  |
| Q53HQ7    | Elongation factor 1-alpha (Fragment) OS=Homo sapiens OX=9606 PE=2 SV=1                                                          | 8                         | 3                       | 4                   | 3                              | 462                | 50.2     | 8.94                  | 10.05                         | 3                                   |
| Q53XB4    | Full-length cDNA clone CS0DF032YM23 of Fetal brain of Homo sapiens (human) OS=Homo sapiens OX=9606 GN=RAB1 PE=2 SV=1            | 9                         | 1                       | 1                   | 1                              | 147                | 16.8     | 9.03                  | 2.35                          | 1                                   |
| Q59F68    | CD68 antigen variant (Fragment) OS=Homo sapiens OX=9606 PE=2 SV=1                                                               | 3                         | 1                       | 1                   | 1                              | 375                | 42.4     | 5.64                  | 2.16                          | 1                                   |
| Q59GA0    | Thy-1 cell surface antigen variant (Fragment) OS=Homo sapiens OX=9606 PE=2 SV=1                                                 | 10                        | 1                       | 3                   | 1                              | 145                | 15.9     | 9                     | 7.19                          | 1                                   |
| Q5M8T4    | Connective tissue growth factor OS=Homo sapiens OX=9606 GN=CTGF PE=2 SV=1                                                       | 22                        | 5                       | 9                   | 5                              | 349                | 38       | 7.94                  | 22.34                         | 5                                   |
| Q5UGI6    | Serine/cysteine proteinase inhibitor clade G member 1 splice variant 2 (Fragment) OS=Homo sapiens OX=9606 GN=SERPING1 PE=2 SV=1 | 24                        | 7                       | 20                  | 7                              | 333                | 37.3     | 8                     | 52.25                         | 7                                   |
| Q6EMK4    | Vasorin OS=Homo sapiens OX=9606 GN=VASN PE=1 SV=1                                                                               | 13                        | 5                       | 7                   | 5                              | 673                | 71.7     | 7.39                  | 17.07                         | 5                                   |
| Q6FHC9    | STC2 protein (Fragment) OS=Homo sapiens OX=9606 GN=STC2 PE=2 SV=1                                                               | 13                        | 2                       | 6                   | 2                              | 302                | 33.2     | 7.3                   | 19.78                         | 2                                   |
| Q6FHU2    | Phosphoglycerate mutase (Fragment) OS=Homo sapiens OX=9606 GN=PGAM1 PE=2 SV=1                                                   | 25                        | 3                       | 5                   | 3                              | 254                | 28.8     | 7.18                  | 13.89                         | 3                                   |
| Q6FWH3    | DF protein OS=Homo sapiens OX=9606 GN=DF PE=2 SV=1                                                                              | 47                        | 7                       | 20                  | 7                              | 228                | 24.4     | 7.24                  | 62.84                         | 7                                   |
| Q6FHZ0    | Malate dehydrogenase OS=Homo sapiens OX=9606 GN=MDH2 PE=2 SV=1                                                                  | 24                        | 5                       | 9                   | 5                              | 338                | 35.5     | 8.68                  | 21.91                         | 5                                   |
| Q6IAW5    | CALU protein OS=Homo sapiens OX=9606 GN=CALU PE=2 SV=1                                                                          | 41                        | 8                       | 21                  | 8                              | 315                | 37.1     | 4.64                  | 55.95                         | 8                                   |
| Q6NUL1    | Exostoses (Multiple) 2 OS=Homo sapiens OX=9606 GN=EXT2 PE=2 SV=1                                                                | 5                         | 2                       | 2                   | 2                              | 718                | 82.1     | 6.55                  | 5.34                          | 2                                   |
| Q6UXB8    | Peptidase inhibitor 16 OS=Homo sapiens OX=9606 GN=PI16 PE=1 SV=1                                                                | 18                        | 6                       | 35                  | 2                              | 463                | 49.4     | 5.39                  | 118.04                        | 6                                   |
| Q6YHK3    | CD109 antigen OS=Homo sapiens OX=9606 GN=CD109 PE=1 SV=2                                                                        | 6                         | 6                       | 9                   | 6                              | 1445               | 161.6    | 5.85                  | 19.92                         | 6                                   |
| Q86Z22    | Epididymis secretory protein Li 297 OS=Homo sapiens OX=9606 GN=HEL-S-297 PE=2 SV=1                                              | 7                         | 1                       | 3                   | 1                              | 226                | 23.8     | 9.06                  | 9.67                          | 1                                   |
| Q8IUX7    | Adipocyte enhancer-binding protein 1 OS=Homo sapiens OX=9606 GN=AEBP1 PE=1 SV=1                                                 | 15                        | 12                      | 24                  | 12                             | 1158               | 130.8    | 5.11                  | 64.6                          | 12                                  |
| Q8NBP7    | Proprotein convertase subtilisin/kexin type 9 OS=Homo sapiens OX=9606 GN=PCSK9 PE=1 SV=3                                        | 6                         | 3                       | 6                   | 3                              | 692                | 74.2     | 6.61                  | 14.33                         | 3                                   |
| Q92520    | Protein FAM3C OS=Homo sapiens OX=9606 GN=FAM3C PE=1 SV=1                                                                        | 7                         | 1                       | 3                   | 1                              | 227                | 24.7     | 8.29                  | 8.17                          | 1                                   |
| Q92626    | Peroxidasin homolog OS=Homo sapiens OX=9606 GN=PXDN PE=1 SV=2                                                                   | 10                        | 9                       | 12                  | 9                              | 1479               | 165.2    | 7.17                  | 33.22                         | 9                                   |

| Accession | Description                                                                                                   | Coverage [%] <sup>a</sup> | # Peptides <sup>b</sup> | # PSMs <sup>c</sup> | # Unique Peptides <sup>d</sup> | # AAs <sup>e</sup> | MW [kDa] | Calc. pI <sup>f</sup> | Score Sequest HT <sup>g</sup> | # Peptides: Sequest HT <sup>h</sup> |
|-----------|---------------------------------------------------------------------------------------------------------------|---------------------------|-------------------------|---------------------|--------------------------------|--------------------|----------|-----------------------|-------------------------------|-------------------------------------|
| Q969H8    | Myeloid-derived growth factor OS=Homo sapiens OX=9606 GN=MYDGF PE=1 SV=1                                      | 9                         | 1                       | 1                   | 1                              | 173                | 18.8     | 6.68                  | 2.31                          | 1                                   |
| Q96AY3    | Peptidyl-prolyl cis-trans isomerase FKBP10 OS=Homo sapiens OX=9606 GN=FKBP10 PE=1 SV=1                        | 7                         | 3                       | 6                   | 3                              | 582                | 64.2     | 5.62                  | 15.16                         | 3                                   |
| Q96HC4    | PDZ and LIM domain protein 5 OS=Homo sapiens OX=9606 GN=PDLIM5 PE=1 SV=5                                      | 2                         | 1                       | 1                   | 1                              | 596                | 63.9     | 8.21                  | 1.93                          | 1                                   |
| Q99715    | Collagen alpha-1(XII) chain OS=Homo sapiens OX=9606 GN=COL12A1 PE=1 SV=2                                      | 28                        | 58                      | 122                 | 58                             | 3063               | 332.9    | 5.53                  | 320.45                        | 58                                  |
| Q9BRK3    | Matrix remodeling-associated protein 8 OS=Homo sapiens OX=9606 GN=MXRA8 PE=1 SV=1                             | 2                         | 1                       | 1                   | 1                              | 442                | 49.1     | 7.23                  | 2.14                          | 1                                   |
| Q9BUD6    | Spondin-2 OS=Homo sapiens OX=9606 GN=SPON2 PE=1 SV=3                                                          | 6                         | 2                       | 2                   | 2                              | 331                | 35.8     | 5.52                  | 4.09                          | 2                                   |
| Q9UHI8    | A disintegrin and metalloproteinase with thrombospondin motifs 1 OS=Homo sapiens OX=9606 GN=ADAMTS1 PE=1 SV=4 | 3                         | 1                       | 1                   | 1                              | 967                | 105.3    | 6.83                  | 3.01                          | 1                                   |
| Q9UNN8    | Endothelial protein C receptor OS=Homo sapiens OX=9606 GN=PROCR PE=1 SV=1                                     | 7                         | 1                       | 1                   | 1                              | 238                | 26.7     | 7.18                  | 2.32                          | 1                                   |
| Q9Y240    | C-type lectin domain family 11 member A OS=Homo sapiens OX=9606 GN=CLEC11A PE=1 SV=1                          | 12                        | 3                       | 3                   | 3                              | 323                | 35.7     | 5.16                  | 7.14                          | 3                                   |
| Q9Y490    | Talin-1 OS=Homo sapiens OX=9606 GN=TLN1 PE=1 SV=3                                                             | 3                         | 5                       | 7                   | 5                              | 2541               | 269.6    | 6.07                  | 16.81                         | 5                                   |
| Q9Y4K0    | Lysyl oxidase homolog 2 OS=Homo sapiens OX=9606 GN=LOXL2 PE=1 SV=1                                            | 10                        | 5                       | 5                   | 5                              | 774                | 86.7     | 6.38                  | 13.01                         | 5                                   |
| Q9Y6C2    | EMILIN-1 OS=Homo sapiens OX=9606 GN=EMILIN1 PE=1 SV=3                                                         | 1                         | 1                       | 2                   | 1                              | 1016               | 106.6    | 5.17                  | 5.29                          | 1                                   |
| V9H1C1    | Gelsolin exon 4 (Fragment) OS=Homo sapiens OX=9606 PE=4 SV=1                                                  | 35                        | 2                       | 4                   | 1                              | 69                 | 8        | 5.78                  | 11.09                         | 2                                   |
| V9HW74    | Ubiquitin carboxyl-terminal hydrolase OS=Homo sapiens OX=9606 GN=HEL-117 PE=2 SV=1                            | 16                        | 2                       | 5                   | 2                              | 223                | 24.8     | 5.48                  | 12.39                         | 2                                   |
| V9HWB4    | Epididymis secretory sperm binding protein Li 89n OS=Homo sapiens OX=9606 GN=HEL-S-89n PE=2 SV=1              | 25                        | 13                      | 26                  | 12                             | 654                | 72.3     | 5.16                  | 66.59                         | 13                                  |
| V9HWC6    | Peptidyl-prolyl cis-trans isomerase OS=Homo sapiens OX=9606 GN=HEL-S-39 PE=2 SV=1                             | 22                        | 4                       | 13                  | 4                              | 208                | 22.7     | 9.32                  | 34.48                         | 4                                   |
| V9HWE8    | Epididymis secretory sperm binding protein Li 47e OS=Homo sapiens OX=9606 GN=HEL-S-47e PE=2 SV=1              | 21                        | 4                       | 5                   | 4                              | 204                | 23.2     | 5.11                  | 11.92                         | 4                                   |
| V9HWF4    | Phosphoglycerate kinase OS=Homo sapiens OX=9606 GN=HEL-S-68p PE=2 SV=1                                        | 8                         | 2                       | 4                   | 2                              | 417                | 44.6     | 8.1                   | 10.64                         | 2                                   |
| V9HWI5    | Cofilin 1 (Non-muscle), isoform CRA_b OS=Homo sapiens OX=9606 GN=HEL-S-15 PE=2 SV=1                           | 37                        | 4                       | 8                   | 4                              | 166                | 18.5     | 8.09                  | 20.42                         | 4                                   |
| V9HWK1    | Triosephosphate isomerase OS=Homo sapiens OX=9606 GN=HEL-S-49 PE=2 SV=1                                       | 45                        | 8                       | 22                  | 8                              | 249                | 26.7     | 6.9                   | 62.14                         | 8                                   |
| V9HWN7    | Fructose-bisphosphate aldolase OS=Homo sapiens OX=9606 GN=HEL-S-87p PE=2 SV=1                                 | 35                        | 7                       | 15                  | 7                              | 364                | 39.4     | 8.09                  | 40.37                         | 7                                   |
| V9HWP2    | Epididymis luminal protein 35 OS=Homo sapiens OX=9606 GN=HEL-S-125m PE=2 SV=1                                 | 11                        | 6                       | 13                  | 5                              | 803                | 92.4     | 4.84                  | 31.22                         | 6                                   |

<sup>a</sup> Coverage is the percentage of the sequence covered by identifications (PSMs only) from the included searches. <sup>b</sup> # Peptides is the number of distinct peptide sequences in the protein. <sup>c</sup> # PSMs is number of identified peptide spectrum matches identified from all included searches, including those redundantly identified. <sup>d</sup> # Unique peptide is the total number of distinct peptide sequences unique to the protein group. <sup>e</sup> #AAs is length of the protein sequence. <sup>f</sup> Calc pI (isoelectric point) number is theoretically calculated isoelectric point for the protein that is, the pH at which a particular molecule carries no net electrical charge. <sup>g</sup> Score Sequest HT is a protein score calculated by summing the individual scores for each peptide. The higher this score, the higher the individual score of the peptide, allowing for better identification. <sup>h</sup> # Peptides: Sequest HT is the number of distinct peptide sequences in the identified protein.

Supplementary Table 1-4: Detailed information on commonly secreted proteins by 3 adipose tissue (AT) mesenchymal stem cells (MSCs) under inflammatory condition.

| Accession  | Description                                                                                                                                     | Coverage [%] <sup>a</sup> | # Peptides <sup>b</sup> | # PSMs <sup>c</sup> | # Unique Peptides <sup>d</sup> | # AAs <sup>e</sup> | MW [kDa] | Calc. pI <sup>f</sup> | Score Sequest HT <sup>g</sup> | # Peptides: Sequest HT <sup>h</sup> |
|------------|-------------------------------------------------------------------------------------------------------------------------------------------------|---------------------------|-------------------------|---------------------|--------------------------------|--------------------|----------|-----------------------|-------------------------------|-------------------------------------|
| A0A024R0A1 | Macrophage colony-stimulating factor 1 OS=Homo sapiens OX=9606 GN=CSF1 PE=4 SV=1                                                                | 13                        | 6                       | 16                  | 6                              | 554                | 60.1     | 5.29                  | 51.01                         | 6                                   |
| A0A024R0A9 | Stromal cell derived factor 4, isoform CRA_b OS=Homo sapiens OX=9606 GN=SDF4 PE=4 SV=1                                                          | 14                        | 4                       | 8                   | 4                              | 348                | 39.6     | 5.11                  | 21.26                         | 4                                   |
| A0A024R1U8 | Insulin-like growth factor binding protein 4, isoform CRA_a OS=Homo sapiens OX=9606 GN=IGFBP4 PE=4 SV=1                                         | 21                        | 4                       | 22                  | 4                              | 258                | 27.9     | 7.15                  | 63.31                         | 4                                   |
| A0A024R2P0 | 40S ribosomal protein SA OS=Homo sapiens OX=9606 GN=RPSA PE=3 SV=1                                                                              | 6                         | 1                       | 2                   | 1                              | 295                | 32.8     | 4.87                  | 3.82                          | 1                                   |
| A0A024R2W4 | Dystroglycan 1 (Dystrophin-associated glycoprotein 1), isoform CRA_a OS=Homo sapiens OX=9606 GN=DAG1 PE=4 SV=1                                  | 4                         | 2                       | 6                   | 2                              | 895                | 97.5     | 8.56                  | 20.08                         | 2                                   |
| A0A024R433 | Insulin-like growth factor binding protein 5, isoform CRA_a OS=Homo sapiens OX=9606 GN=IGFBP5 PE=4 SV=1                                         | 22                        | 4                       | 11                  | 4                              | 272                | 30.6     | 8.21                  | 30.25                         | 4                                   |
| A0A024R462 | Fibronectin 1, isoform CRA_n OS=Homo sapiens OX=9606 GN=FN1 PE=4 SV=1                                                                           | 56                        | 74                      | 879                 | 39                             | 2355               | 259      | 5.73                  | 3071.96                       | 74                                  |
| A0A024R5Z7 | Annexin OS=Homo sapiens OX=9606 GN=ANXA2 PE=3 SV=1                                                                                              | 40                        | 11                      | 29                  | 11                             | 339                | 38.6     | 7.75                  | 78.57                         | 11                                  |
| A0A024R694 | Actinin, alpha 1, isoform CRA_a OS=Homo sapiens OX=9606 GN=ACTN1 PE=4 SV=1                                                                      | 24                        | 16                      | 36                  | 8                              | 892                | 103      | 5.41                  | 90.82                         | 16                                  |
| A0A024R6R4 | Matrix metalloproteinase 2 (Gelatinase A, 72kDa gelatinase, 72kDa type IV collagenase), isoform CRA_a OS=Homo sapiens OX=9606 GN=MMP2 PE=3 SV=1 | 54                        | 22                      | 178                 | 22                             | 660                | 73.8     | 5.47                  | 603.44                        | 22                                  |
| A0A024R8E5 | Collagen, type V, alpha 1, isoform CRA_a OS=Homo sapiens OX=9606 GN=COL5A1 PE=4 SV=1                                                            | 19                        | 20                      | 69                  | 18                             | 1838               | 183.4    | 5.06                  | 230.97                        | 20                                  |
| A0A024R8V7 | TIMP metalloproteinase inhibitor 2, isoform CRA_b OS=Homo sapiens OX=9606 GN=TIMP2 PE=4 SV=1                                                    | 41                        | 5                       | 21                  | 5                              | 179                | 20.2     | 7.17                  | 71.84                         | 5                                   |
| A0A024R969 | Chitinase 3-like 1 (Cartilage glycoprotein-39), isoform CRA_a OS=Homo sapiens OX=9606 GN=CHI3L1 PE=3 SV=1                                       | 33                        | 9                       | 24                  | 9                              | 383                | 42.6     | 8.46                  | 70.19                         | 9                                   |
| A0A024RA94 | Microfibrillar-associated protein 2, isoform CRA_d OS=Homo sapiens OX=9606 GN=MFAP2 PE=4 SV=1                                                   | 10                        | 1                       | 4                   | 1                              | 183                | 20.8     | 4.97                  | 10.71                         | 1                                   |
| A0A024RAQ9 | Chondroitin sulfate proteoglycan 2 (Versican), isoform CRA_b OS=Homo sapiens OX=9606 GN=CSPG2 PE=4 SV=1                                         | 5                         | 13                      | 37                  | 13                             | 3396               | 372.6    | 4.51                  | 104.1                         | 13                                  |
| A0A024RDA5 | Multifunctional fusion protein OS=Homo sapiens OX=9606 GN=IL8 PE=3 SV=1                                                                         | 16                        | 1                       | 18                  | 1                              | 99                 | 11.1     | 8.84                  | 57.56                         | 1                                   |
| A0A024RDW8 | Collagen, type IV, alpha 2, isoform CRA_a OS=Homo sapiens OX=9606 GN=COL4A2 PE=4 SV=1                                                           | 24                        | 22                      | 58                  | 22                             | 1712               | 167.4    | 8.66                  | 175.93                        | 22                                  |
| A0A087WTA8 | Collagen alpha-2(I) chain OS=Homo sapiens OX=9606 GN=COL1A2 PE=1 SV=1                                                                           | 61                        | 42                      | 1049                | 42                             | 1364               | 129.1    | 9.01                  | 3618.4                        | 42                                  |
| A0A087WX80 | Laminin subunit alpha-2 OS=Homo sapiens OX=9606 GN=LAMA2 PE=1 SV=1                                                                              | 9                         | 19                      | 33                  | 19                             | 3121               | 343.5    | 6.39                  | 78.76                         | 19                                  |
| A0A087WY35 | Integrin beta-like protein 1 OS=Homo sapiens OX=9606 GN=ITGBL1 PE=1 SV=1                                                                        | 11                        | 3                       | 7                   | 3                              | 445                | 48.5     | 5.4                   | 17.5                          | 3                                   |
| A0A087WZ51 | Tumor protein D54 OS=Homo sapiens OX=9606 GN=TPD52L2 PE=1 SV=1                                                                                  | 13                        | 1                       | 1                   | 1                              | 152                | 16.3     | 4.92                  | 1.94                          | 1                                   |
| A0A087X0S5 | Collagen alpha-1(VI) chain OS=Homo sapiens OX=9606 GN=COL6A1 PE=1 SV=1                                                                          | 46                        | 27                      | 216                 | 27                             | 1026               | 108.3    | 5.43                  | 698.07                        | 27                                  |
| A0A0A0MT01 | Gelsolin OS=Homo sapiens OX=9606 GN=GSN PE=1 SV=1                                                                                               | 29                        | 11                      | 29                  | 10                             | 767                | 84.7     | 5.83                  | 82.9                          | 11                                  |
| A0A0B4U5E3 | Granulocyte-colony stimulating factor (Fragment) OS=Homo sapiens OX=9606 PE=2 SV=1                                                              | 9                         | 1                       | 4                   | 1                              | 174                | 18.7     | 6.04                  | 15.72                         | 1                                   |
| A0A0S2Z3G9 | Actinin alpha 4 isoform 1 (Fragment) OS=Homo sapiens OX=9606 GN=ACTN4 PE=2 SV=1                                                                 | 28                        | 19                      | 38                  | 11                             | 911                | 104.8    | 5.44                  | 92.04                         | 19                                  |
| A0A0S2Z3Y1 | Lectin galactoside-binding soluble 3 binding protein isoform 1 (Fragment) OS=Homo sapiens OX=9606 GN=LGALS3BP PE=2 SV=1                         | 22                        | 8                       | 17                  | 8                              | 585                | 65.3     | 5.27                  | 46.43                         | 8                                   |
| A0A140T902 | Tenascin-X OS=Homo sapiens OX=9606 GN=TNXB PE=1 SV=1                                                                                            | 3                         | 8                       | 9                   | 8                              | 4222               | 455.9    | 5.2                   | 19.14                         | 8                                   |

| Accession  | Description                                                                                                                                                                                         | Coverage [%] <sup>a</sup> | # Peptides <sup>b</sup> | # PSMs <sup>c</sup> | # Unique Peptides <sup>d</sup> | # AAs <sup>e</sup> | MW [kDa] | Calc. pI <sup>f</sup> | Score Sequest HT <sup>g</sup> | # Peptides: Sequest HT <sup>h</sup> |
|------------|-----------------------------------------------------------------------------------------------------------------------------------------------------------------------------------------------------|---------------------------|-------------------------|---------------------|--------------------------------|--------------------|----------|-----------------------|-------------------------------|-------------------------------------|
| A0A140VJI7 | Testicular tissue protein Li 61 OS=Homo sapiens OX=9606 PE=2 SV=1                                                                                                                                   | 56                        | 18                      | 64                  | 13                             | 540                | 60.6     | 6.71                  | 215.36                        | 18                                  |
| A0A161I202 | Lactoferrin OS=Homo sapiens OX=9606 GN=LTF PE=2 SV=1                                                                                                                                                | 3                         | 2                       | 6                   | 2                              | 711                | 78.3     | 8.18                  | 14.35                         | 2                                   |
| A0A172Q381 | Endosialin (Fragment) OS=Homo sapiens OX=9606 GN=TEM1 PE=2 SV=1                                                                                                                                     | 7                         | 2                       | 3                   | 2                              | 668                | 71.2     | 5.01                  | 8.66                          | 2                                   |
| A0A1B0GU92 | Uncharacterized protein OS=Homo sapiens OX=9606 PE=1 SV=1                                                                                                                                           | 5                         | 2                       | 6                   | 2                              | 557                | 59.8     | 6.62                  | 14.56                         | 2                                   |
| A0A1U9X7H4 | CFB OS=Homo sapiens OX=9606 PE=3 SV=1                                                                                                                                                               | 27                        | 15                      | 45                  | 15                             | 764                | 85.5     | 6.96                  | 149.67                        | 15                                  |
| A0A2R8Y5V9 | Tropomyosin alpha-4 chain OS=Homo sapiens OX=9606 GN=TPM4 PE=1 SV=1                                                                                                                                 | 17                        | 6                       | 21                  | 4                              | 248                | 28.6     | 4.7                   | 49.94                         | 6                                   |
| A1KY36     | Cell proliferation-inducing protein 41 OS=Homo sapiens OX=9606 PE=2 SV=1                                                                                                                            | 4                         | 2                       | 3                   | 2                              | 745                | 73.4     | 9.61                  | 7.08                          | 2                                   |
| A1L4H1     | Soluble scavenger receptor cysteine-rich domain-containing protein SSC5D OS=Homo sapiens OX=9606 GN=SSC5D PE=1 SV=3                                                                                 | 2                         | 2                       | 2                   | 2                              | 1573               | 165.6    | 6.13                  | 5.16                          | 2                                   |
| A2VCQ4     | PRKCSH protein (Fragment) OS=Homo sapiens OX=9606 GN=PRKCSH PE=2 SV=1                                                                                                                               | 13                        | 2                       | 3                   | 2                              | 181                | 20.3     | 4.72                  | 6.66                          | 2                                   |
| A4D1W7     | Inhibin, beta A (Activin A, activin AB alpha polypeptide) OS=Homo sapiens OX=9606 GN=INHBA PE=2 SV=1                                                                                                | 27                        | 10                      | 47                  | 10                             | 426                | 47.4     | 8.03                  | 141.96                        | 10                                  |
| A4D2D2     | Procollagen C-endopeptidase enhancer OS=Homo sapiens OX=9606 GN=PCOLCE PE=4 SV=1                                                                                                                    | 37                        | 11                      | 30                  | 11                             | 449                | 47.9     | 7.43                  | 86.73                         | 11                                  |
| A5PLM9     | Cathepsin L1 OS=Homo sapiens OX=9606 GN=CTSL1 PE=2 SV=1                                                                                                                                             | 8                         | 2                       | 3                   | 2                              | 333                | 37.5     | 5.45                  | 9.01                          | 2                                   |
| A6XMH5     | Beta-2-microglobulin OS=Homo sapiens OX=9606 PE=2 SV=1                                                                                                                                              | 24                        | 1                       | 13                  | 1                              | 92                 | 10.4     | 8.02                  | 50.57                         | 1                                   |
| A6XND1     | Insulin-like growth factor binding protein 3 isoform b OS=Homo sapiens OX=9606 GN=IGFBP3 PE=1 SV=1                                                                                                  | 23                        | 4                       | 11                  | 4                              | 263                | 29       | 8.46                  | 32.62                         | 4                                   |
| A8K2H4     | cDNA FLJ78235 OS=Homo sapiens OX=9606 PE=2 SV=1                                                                                                                                                     | 21                        | 5                       | 13                  | 5                              | 339                | 37.8     | 6.3                   | 40.91                         | 5                                   |
| A8K482     | Aspartate aminotransferase OS=Homo sapiens OX=9606 PE=2 SV=1                                                                                                                                        | 3                         | 1                       | 3                   | 1                              | 430                | 47.5     | 9.23                  | 7.41                          | 1                                   |
| A8K7Q1     | cDNA FLJ77770, highly similar to Homo sapiens nucleobindin 1 (NUCB1), mRNA OS=Homo sapiens OX=9606 PE=2 SV=1                                                                                        | 35                        | 11                      | 39                  | 11                             | 461                | 53.9     | 5.25                  | 113.14                        | 11                                  |
| A8K7T4     | cDNA FLJ75774, highly similar to Homo sapiens lectin, mannose-binding 2 (LMAN2), mRNA OS=Homo sapiens OX=9606 PE=2 SV=1                                                                             | 6                         | 1                       | 3                   | 1                              | 356                | 40.2     | 6.95                  | 7.85                          | 1                                   |
| A8KA16     | cDNA FLJ77243, highly similar to Homo sapiens steroid sensitive gene 1 (URB), transcript variant 1, mRNA OS=Homo sapiens OX=9606 PE=2 SV=1                                                          | 15                        | 11                      | 18                  | 11                             | 950                | 108.1    | 9.69                  | 45.6                          | 11                                  |
| A8KAJ3     | cDNA FLJ77823, highly similar to Homo sapiens EGF-containing fibulin-like extracellular matrix protein 1, transcript variant 3, mRNA OS=Homo sapiens OX=9606 PE=2 SV=1                              | 40                        | 13                      | 46                  | 13                             | 493                | 54.6     | 5.14                  | 132.33                        | 13                                  |
| B2R4R0     | Histone H4 OS=Homo sapiens OX=9606 GN=HIST1H4H PE=2 SV=1                                                                                                                                            | 21                        | 2                       | 6                   | 2                              | 103                | 11.4     | 11.36                 | 16.57                         | 2                                   |
| B2R577     | Protein S100 OS=Homo sapiens OX=9606 PE=2 SV=1                                                                                                                                                      | 20                        | 1                       | 1                   | 1                              | 90                 | 10.1     | 5.91                  | 2.04                          | 1                                   |
| B2R5J8     | C-C motif chemokine OS=Homo sapiens OX=9606 PE=2 SV=1                                                                                                                                               | 12                        | 1                       | 3                   | 1                              | 91                 | 10       | 9.07                  | 8.66                          | 1                                   |
| B2R5M9     | cDNA, FLJ92537, highly similar to Homo sapiens procollagen-lysine, 2-oxoglutarate 5-dioxygenase (lysine hydroxylase, Ehlers-Danlos syndrome type VI) (PLOD), mRNA OS=Homo sapiens OX=9606 PE=2 SV=1 | 8                         | 4                       | 6                   | 4                              | 727                | 83.5     | 7.02                  | 13.48                         | 4                                   |
| B2R701     | cDNA, FLJ93202, Homo sapiens protease inhibitor 16 (PI16), mRNA OS=Homo sapiens OX=9606 PE=2 SV=1                                                                                                   | 17                        | 4                       | 24                  | 1                              | 428                | 45.7     | 5.38                  | 82.77                         | 4                                   |
| B2RBS8     | cDNA, FLJ95666, highly similar to Homo sapiens albumin (ALB), mRNA OS=Homo sapiens OX=9606 PE=2 SV=1                                                                                                | 2                         | 2                       | 22                  | 2                              | 609                | 69.3     | 6.28                  | 71.93                         | 2                                   |
| B2RCM5     | cDNA, FLJ96160, highly similar to Homo sapiens EGF-containing fibulin-like extracellular matrix protein 2 (EFEMP2), mRNA OS=Homo sapiens OX=9606 PE=2 SV=1                                          | 21                        | 7                       | 16                  | 7                              | 443                | 49.3     | 4.94                  | 42.87                         | 7                                   |

| Accession | Description                                                                                                                               | Coverage [%] <sup>a</sup> | # Peptides <sup>b</sup> | # PSMs <sup>c</sup> | # Unique Peptides <sup>d</sup> | # AAs <sup>e</sup> | MW [kDa] | Calc. pI <sup>f</sup> | Score Sequest HT <sup>g</sup> | # Peptides: Sequest HT <sup>h</sup> |
|-----------|-------------------------------------------------------------------------------------------------------------------------------------------|---------------------------|-------------------------|---------------------|--------------------------------|--------------------|----------|-----------------------|-------------------------------|-------------------------------------|
| B2RDW0    | cDNA, FLJ96792, highly similar to Homo sapiens calmodulin 2 (phosphorylase kinase, delta) (CALM2), mRNA OS=Homo sapiens OX=9606 PE=2 SV=1 | 11                        | 1                       | 4                   | 1                              | 149                | 16.8     | 4.22                  | 11.57                         | 1                                   |
| B3KQT9    | Protein disulfide-isomerase OS=Homo sapiens OX=9606 PE=2 SV=1                                                                             | 16                        | 5                       | 7                   | 5                              | 480                | 54.1     | 7.21                  | 22.95                         | 5                                   |
| B3KRN4    | cDNA FLJ34625 fis, clone KIDNE2015244, highly similar to Serine protease HTRA1 OS=Homo sapiens OX=9606 PE=2 SV=1                          | 19                        | 6                       | 17                  | 6                              | 447                | 48.4     | 10.13                 | 48.3                          | 6                                   |
| B4DDQ2    | Biglycan OS=Homo sapiens OX=9606 PE=2 SV=1                                                                                                | 51                        | 12                      | 79                  | 12                             | 334                | 37.6     | 7.97                  | 251.57                        | 12                                  |
| B4DE78    | cDNA FLJ52141, highly similar to 14-3-3 protein gamma OS=Homo sapiens OX=9606 PE=2 SV=1                                                   | 12                        | 2                       | 4                   | 1                              | 207                | 23.5     | 4.82                  | 8.72                          | 2                                   |
| B4DID6    | cDNA FLJ52545, highly similar to Dickkopf-related protein 3 OS=Homo sapiens OX=9606 PE=2 SV=1                                             | 12                        | 3                       | 8                   | 3                              | 364                | 39.8     | 4.67                  | 22.18                         | 3                                   |
| B4DJ30    | cDNA FLJ61290, highly similar to Neutral alpha-glucosidase AB OS=Homo sapiens OX=9606 PE=2 SV=1                                           | 7                         | 4                       | 9                   | 4                              | 995                | 112.9    | 6.06                  | 23.48                         | 4                                   |
| B4DLV7    | Rab GDP dissociation inhibitor OS=Homo sapiens OX=9606 PE=2 SV=1                                                                          | 8                         | 2                       | 4                   | 2                              | 449                | 51.1     | 8.18                  | 9.62                          | 2                                   |
| B4DM79    | cDNA FLJ53848, highly similar to Inter-alpha-trypsin inhibitor heavy chain H2 OS=Homo sapiens OX=9606 PE=2 SV=1                           | 5                         | 2                       | 4                   | 2                              | 543                | 60.7     | 5.35                  | 10.5                          | 2                                   |
| B4DMR3    | cDNA FLJ51896, highly similar to Glia-derived nexin OS=Homo sapiens OX=9606 PE=2 SV=1                                                     | 36                        | 9                       | 41                  | 9                              | 334                | 37.1     | 9.52                  | 108.58                        | 9                                   |
| B4DNG0    | cDNA FLJ58142, highly similar to Olfactomedin-like protein 3 OS=Homo sapiens OX=9606 GN=OLFML3 PE=1 SV=1                                  | 29                        | 7                       | 22                  | 7                              | 345                | 39       | 6.11                  | 54.1                          | 7                                   |
| B4DPQ0    | Complement C1r subcomponent OS=Homo sapiens OX=9606 GN=C1R PE=1 SV=1                                                                      | 50                        | 21                      | 113                 | 21                             | 719                | 81.8     | 6.37                  | 379.97                        | 21                                  |
| B4DRT4    | cDNA FLJ51535, highly similar to Phosphatidylethanolamine-binding protein 1 OS=Homo sapiens OX=9606 PE=2 SV=1                             | 23                        | 2                       | 6                   | 2                              | 155                | 17.3     | 6                     | 14.91                         | 2                                   |
| B4DRV4    | cDNA FLJ55667, highly similar to Secreted protein acidic and rich in cysteine OS=Homo sapiens OX=9606 PE=2 SV=1                           | 70                        | 13                      | 122                 | 1                              | 212                | 24.7     | 5.62                  | 375.58                        | 13                                  |
| B4DU16    | cDNA FLJ54550, highly similar to Homo sapiens fibronectin 1 (FN1), transcript variant 6, mRNA OS=Homo sapiens OX=9606 PE=2 SV=1           | 67                        | 35                      | 412                 | 1                              | 894                | 98.1     | 6.24                  | 1465.76                       | 35                                  |
| B4DWC4    | Chloride intracellular channel protein OS=Homo sapiens OX=9606 PE=2 SV=1                                                                  | 6                         | 1                       | 1                   | 1                              | 245                | 27.8     | 6.38                  | 2.31                          | 1                                   |
| B4DZ36    | cDNA FLJ58441, highly similar to Attractin OS=Homo sapiens OX=9606 PE=2 SV=1                                                              | 1                         | 1                       | 3                   | 1                              | 1156               | 129.7    | 6.87                  | 6.93                          | 1                                   |
| B4E324    | cDNA FLJ60397, highly similar to Lysosomal protective protein OS=Homo sapiens OX=9606 PE=2 SV=1                                           | 3                         | 1                       | 3                   | 1                              | 480                | 54.2     | 6.98                  | 7.68                          | 1                                   |
| B4E3Q1    | cDNA FLJ61580, highly similar to Calsyntenin-1 OS=Homo sapiens OX=9606 PE=2 SV=1                                                          | 14                        | 9                       | 24                  | 9                              | 962                | 107.7    | 4.97                  | 71.44                         | 9                                   |
| B4E3S0    | Coronin OS=Homo sapiens OX=9606 GN=CORO1C PE=1 SV=1                                                                                       | 3                         | 1                       | 1                   | 1                              | 369                | 41.6     | 6.73                  | 2.41                          | 1                                   |
| B5MCZ3    | Interleukin-6 OS=Homo sapiens OX=9606 GN=IL6 PE=1 SV=1                                                                                    | 48                        | 7                       | 49                  | 7                              | 189                | 21.5     | 6.57                  | 156.65                        | 7                                   |
| B7Z1I2    | Aspartate aminotransferase OS=Homo sapiens OX=9606 PE=2 SV=1                                                                              | 4                         | 1                       | 1                   | 1                              | 366                | 41       | 7.18                  | 2.03                          | 1                                   |
| B7Z9B8    | cDNA FLJ56912, highly similar to Fibulin-2 OS=Homo sapiens OX=9606 PE=2 SV=1                                                              | 7                         | 5                       | 6                   | 5                              | 1210               | 129.3    | 4.87                  | 14.1                          | 5                                   |
| B7ZA74    | cDNA, FLJ79088, highly similar to UV excision repair protein RAD23 homolog B OS=Homo sapiens OX=9606 PE=2 SV=1                            | 3                         | 1                       | 1                   | 1                              | 388                | 40.7     | 4.94                  | 1.93                          | 1                                   |
| C9JIZ6    | Prosaposin OS=Homo sapiens OX=9606 GN=PSAP PE=1 SV=2                                                                                      | 20                        | 8                       | 13                  | 8                              | 527                | 58.4     | 5.17                  | 31.46                         | 8                                   |
| C9JPM3    | Disintegrin and metalloproteinase domain-containing protein 9 OS=Homo sapiens OX=9606 GN=ADAM9 PE=1 SV=1                                  | 11                        | 1                       | 3                   | 1                              | 147                | 16.8     | 8.95                  | 7.52                          | 1                                   |
| D0PNI1    | Epididymis luminal protein 4 OS=Homo sapiens OX=9606 GN=YWHAZ PE=2 SV=1                                                                   | 17                        | 3                       | 6                   | 2                              | 245                | 27.7     | 4.79                  | 15.56                         | 3                                   |
| D0PNI2    | Lysyl oxidase OS=Homo sapiens OX=9606 GN=LOX PE=4 SV=1                                                                                    | 27                        | 8                       | 18                  | 8                              | 417                | 46.9     | 8.09                  | 46.99                         | 8                                   |

| Accession | Description                                                                                                 | Coverage [%] <sup>a</sup> | # Peptides <sup>b</sup> | # PSMs <sup>c</sup> | # Unique Peptides <sup>d</sup> | # AAs <sup>e</sup> | MW [kDa] | Calc. pI <sup>f</sup> | Score Sequest HT <sup>g</sup> | # Peptides: Sequest HT <sup>h</sup> |
|-----------|-------------------------------------------------------------------------------------------------------------|---------------------------|-------------------------|---------------------|--------------------------------|--------------------|----------|-----------------------|-------------------------------|-------------------------------------|
| D1MGQ2    | Alpha-2 globin chain OS=Homo sapiens OX=9606 GN=HBA2 PE=3 SV=1                                              | 17                        | 2                       | 4                   | 2                              | 142                | 15.2     | 8.68                  | 10.18                         | 2                                   |
| D3DSM4    | Collagen, type XVIII, alpha 1, isoform CRA_d OS=Homo sapiens OX=9606 GN=COL18A1 PE=4 SV=1                   | 2                         | 2                       | 3                   | 2                              | 1336               | 135.4    | 6.47                  | 7.54                          | 2                                   |
| D3DTX7    | Collagen, type I, alpha 1, isoform CRA_a OS=Homo sapiens OX=9606 GN=COL1A1 PE=4 SV=1                        | 67                        | 34                      | 314                 | 2                              | 885                | 84.7     | 6.24                  | 1104.89                       | 34                                  |
| D3YTG3    | Target of Nesh-SH3 OS=Homo sapiens OX=9606 GN=ABI3BP PE=1 SV=1                                              | 13                        | 16                      | 66                  | 16                             | 1777               | 195.2    | 9.73                  | 191.98                        | 16                                  |
| D6RF35    | Vitamin D-binding protein OS=Homo sapiens OX=9606 GN=GC PE=1 SV=1                                           | 8                         | 2                       | 6                   | 2                              | 476                | 53       | 5.52                  | 17.1                          | 2                                   |
| D6RF92    | C-X-C motif chemokine OS=Homo sapiens OX=9606 GN=CXCL6 PE=1 SV=1                                            | 29                        | 4                       | 14                  | 3                              | 113                | 11.9     | 9.76                  | 33.54                         | 4                                   |
| D9ZGF2    | Collagen, type VI, alpha 3 OS=Homo sapiens OX=9606 GN=COL6A3 PE=4 SV=1                                      | 22                        | 45                      | 117                 | 45                             | 3177               | 343.5    | 6.68                  | 315.59                        | 45                                  |
| E7EUF1    | Ectonucleotide pyrophosphatase/phosphodiesterase family member 2 OS=Homo sapiens OX=9606 GN=ENPP2 PE=1 SV=1 | 10                        | 7                       | 14                  | 7                              | 884                | 101.5    | 7.53                  | 34.65                         | 7                                   |
| E9PL83    | ADM OS=Homo sapiens OX=9606 GN=ADM PE=1 SV=1                                                                | 9                         | 1                       | 2                   | 1                              | 138                | 15       | 10.76                 | 4.11                          | 1                                   |
| F5GXS0    | Complement C4-B OS=Homo sapiens OX=9606 GN=C4B PE=1 SV=1                                                    | 1                         | 1                       | 2                   | 1                              | 1698               | 187.6    | 7.33                  | 5.33                          | 1                                   |
| F8VR42    | Dynein regulatory complex subunit 2 (Fragment) OS=Homo sapiens OX=9606 GN=CCDC65 PE=1 SV=1                  | 3                         | 1                       | 2                   | 1                              | 373                | 44       | 9.25                  | 3.84                          | 1                                   |
| F8W6I7    | Heterogeneous nuclear ribonucleoprotein A1 OS=Homo sapiens OX=9606 GN=HNRNPA1 PE=1 SV=2                     | 3                         | 1                       | 1                   | 1                              | 307                | 33.1     | 9.13                  | 2.35                          | 1                                   |
| G3V3E8    | NPC intracellular cholesterol transporter 2 OS=Homo sapiens OX=9606 GN=NPC2 PE=1 SV=1                       | 13                        | 1                       | 1                   | 1                              | 174                | 19.2     | 8.44                  | 3.41                          | 1                                   |
| G9K389    | YWHAH/FAM22B fusion protein (Fragment) OS=Homo sapiens OX=9606 GN=YWHAH/FAM22B fusion PE=2 SV=1             | 12                        | 3                       | 7                   | 2                              | 384                | 41.3     | 4.97                  | 16.18                         | 3                                   |
| H0YGS3    | Microfibrillar-associated protein 5 (Fragment) OS=Homo sapiens OX=9606 GN=MFAP5 PE=1 SV=1                   | 44                        | 3                       | 11                  | 3                              | 79                 | 9.4      | 9.47                  | 28.82                         | 3                                   |
| H7BZJ3    | Protein disulfide-isomerase A3 (Fragment) OS=Homo sapiens OX=9606 GN=PDIA3 PE=1 SV=1                        | 11                        | 1                       | 2                   | 1                              | 123                | 13.5     | 7.3                   | 6.88                          | 1                                   |
| I4AY87    | Macrophage migration inhibitory factor (Fragment) OS=Homo sapiens OX=9606 GN=MIF PE=1 SV=1                  | 18                        | 2                       | 4                   | 2                              | 115                | 12.5     | 7.88                  | 8.37                          | 2                                   |
| M0R0Y4    | Urokinase plasminogen activator surface receptor (Fragment) OS=Homo sapiens OX=9606 GN=PLAUR PE=1 SV=1      | 6                         | 1                       | 1                   | 1                              | 185                | 20.7     | 6.6                   | 2.19                          | 1                                   |
| M1VE83    | Tyrosine-protein kinase receptor OS=Homo sapiens OX=9606 GN=SDC4-ROS1_S4;R34 PE=2 SV=1                      | 2                         | 1                       | 3                   | 1                              | 643                | 71.6     | 4.81                  | 9.08                          | 1                                   |
| O00300    | Tumor necrosis factor receptor superfamily member 11B OS=Homo sapiens OX=9606 GN=TNFRSF11B PE=1 SV=3        | 11                        | 3                       | 7                   | 3                              | 401                | 46       | 8.29                  | 16.57                         | 3                                   |
| O00391    | Sulfhydryl oxidase 1 OS=Homo sapiens OX=9606 GN=QSOX1 PE=1 SV=3                                             | 45                        | 24                      | 92                  | 24                             | 747                | 82.5     | 8.92                  | 308.93                        | 24                                  |
| O00468    | Agrin OS=Homo sapiens OX=9606 GN=AGRN PE=1 SV=6                                                             | 11                        | 14                      | 24                  | 14                             | 2068               | 217.2    | 6.39                  | 63.48                         | 14                                  |
| O14950    | Myosin regulatory light chain 12B OS=Homo sapiens OX=9606 GN=MYL12B PE=1 SV=2                               | 23                        | 3                       | 8                   | 3                              | 172                | 19.8     | 4.84                  | 20.13                         | 3                                   |
| O14992    | HS24/P52 OS=Homo sapiens OX=9606 GN=HS24/p52 PE=2 SV=1                                                      | 3                         | 1                       | 1                   | 1                              | 474                | 52.3     | 8.21                  | 2.13                          | 1                                   |
| O15511    | Actin-related protein 2/3 complex subunit 5 OS=Homo sapiens OX=9606 GN=ARPC5 PE=1 SV=3                      | 8                         | 1                       | 1                   | 1                              | 151                | 16.3     | 5.67                  | 2.1                           | 1                                   |
| O75462    | Cytokine receptor-like factor 1 OS=Homo sapiens OX=9606 GN=CRLF1 PE=1 SV=1                                  | 3                         | 1                       | 2                   | 1                              | 422                | 46.3     | 9.11                  | 4.15                          | 1                                   |
| P01024    | Complement C3 OS=Homo sapiens OX=9606 GN=C3 PE=1 SV=2                                                       | 40                        | 46                      | 164                 | 46                             | 1663               | 187      | 6.4                   | 471.33                        | 46                                  |
| P01033    | Metalloproteinase inhibitor 1 OS=Homo sapiens OX=9606 GN=TIMP1 PE=1 SV=1                                    | 54                        | 7                       | 99                  | 7                              | 207                | 23.2     | 8.1                   | 389.41                        | 7                                   |



| Accession | Description                                                                   | Coverage [%] <sup>a</sup> | # Peptides <sup>b</sup> | # PSMs <sup>c</sup> | # Unique Peptides <sup>d</sup> | # AAs <sup>e</sup> | MW [kDa] | Calc. pI <sup>f</sup> | Score Sequest HT <sup>g</sup> | # Peptides: Sequest HT <sup>h</sup> |
|-----------|-------------------------------------------------------------------------------|---------------------------|-------------------------|---------------------|--------------------------------|--------------------|----------|-----------------------|-------------------------------|-------------------------------------|
| P01034    | Cystatin-C OS=Homo sapiens OX=9606 GN=CST3 PE=1 SV=1                          | 44                        | 4                       | 18                  | 4                              | 146                | 15.8     | 8.75                  | 53.53                         | 4                                   |
| P02452    | Collagen alpha-1(I) chain OS=Homo sapiens OX=9606 GN=COL1A1 PE=1 SV=5         | 59                        | 46                      | 389                 | 14                             | 1464               | 138.9    | 5.8                   | 1341.49                       | 46                                  |
| P02461    | Collagen alpha-1(III) chain OS=Homo sapiens OX=9606 GN=COL3A1 PE=1 SV=4       | 41                        | 33                      | 195                 | 33                             | 1466               | 138.5    | 6.61                  | 635.96                        | 33                                  |
| P02462    | Collagen alpha-1(IV) chain OS=Homo sapiens OX=9606 GN=COL4A1 PE=1 SV=4        | 7                         | 6                       | 15                  | 6                              | 1669               | 160.5    | 8.28                  | 41.88                         | 6                                   |
| P04083    | Annexin A1 OS=Homo sapiens OX=9606 GN=ANXA1 PE=1 SV=2                         | 20                        | 5                       | 11                  | 5                              | 346                | 38.7     | 7.02                  | 26.62                         | 5                                   |
| P05997    | Collagen alpha-2(V) chain OS=Homo sapiens OX=9606 GN=COL5A2 PE=1 SV=3         | 44                        | 33                      | 101                 | 33                             | 1499               | 144.8    | 6.46                  | 313.17                        | 33                                  |
| P07195    | L-lactate dehydrogenase B chain OS=Homo sapiens OX=9606 GN=LDHB PE=1 SV=2     | 3                         | 1                       | 3                   | 1                              | 334                | 36.6     | 6.05                  | 6.54                          | 1                                   |
| P07585    | Decorin OS=Homo sapiens OX=9606 GN=DCN PE=1 SV=1                              | 33                        | 10                      | 57                  | 10                             | 359                | 39.7     | 8.54                  | 180.62                        | 10                                  |
| P07737    | Profilin-1 OS=Homo sapiens OX=9606 GN=PFN1 PE=1 SV=2                          | 50                        | 5                       | 15                  | 5                              | 140                | 15       | 8.27                  | 37.99                         | 5                                   |
| P07942    | Laminin subunit beta-1 OS=Homo sapiens OX=9606 GN=LAMB1 PE=1 SV=2             | 15                        | 16                      | 36                  | 16                             | 1786               | 197.9    | 4.94                  | 93.12                         | 16                                  |
| P07996    | Thrombospondin-1 OS=Homo sapiens OX=9606 GN=THBS1 PE=1 SV=2                   | 37                        | 29                      | 93                  | 27                             | 1170               | 129.3    | 4.94                  | 268.97                        | 29                                  |
| P08254    | Stromelysin-1 OS=Homo sapiens OX=9606 GN=MMP3 PE=1 SV=2                       | 9                         | 4                       | 8                   | 4                              | 477                | 53.9     | 6.16                  | 19.11                         | 4                                   |
| P08670    | Vimentin OS=Homo sapiens OX=9606 GN=VIM PE=1 SV=4                             | 39                        | 15                      | 73                  | 15                             | 466                | 53.6     | 5.12                  | 202.72                        | 15                                  |
| P09341    | Growth-regulated alpha protein OS=Homo sapiens OX=9606 GN=CXCL1 PE=1 SV=1     | 37                        | 3                       | 47                  | 2                              | 107                | 11.3     | 10.43                 | 169.12                        | 3                                   |
| P09382    | Galectin-1 OS=Homo sapiens OX=9606 GN=LGALS1 PE=1 SV=2                        | 60                        | 5                       | 21                  | 5                              | 135                | 14.7     | 5.5                   | 58.74                         | 5                                   |
| P09486    | SPARC OS=Homo sapiens OX=9606 GN=SPARC PE=1 SV=1                              | 56                        | 14                      | 150                 | 2                              | 303                | 34.6     | 4.84                  | 468.66                        | 14                                  |
| P09871    | Complement C1s subcomponent OS=Homo sapiens OX=9606 GN=C1S PE=1 SV=1          | 46                        | 22                      | 103                 | 22                             | 688                | 76.6     | 4.96                  | 333.82                        | 22                                  |
| P10599    | Thioredoxin OS=Homo sapiens OX=9606 GN=TXN PE=1 SV=3                          | 23                        | 2                       | 7                   | 2                              | 105                | 11.7     | 4.92                  | 16.18                         | 2                                   |
| P10909    | Clusterin OS=Homo sapiens OX=9606 GN=CLU PE=1 SV=1                            | 23                        | 7                       | 21                  | 7                              | 449                | 52.5     | 6.27                  | 60.05                         | 7                                   |
| P11047    | Laminin subunit gamma-1 OS=Homo sapiens OX=9606 GN=LAMC1 PE=1 SV=3            | 21                        | 21                      | 45                  | 21                             | 1609               | 177.5    | 5.12                  | 119.51                        | 21                                  |
| P12110    | Collagen alpha-2(VI) chain OS=Homo sapiens OX=9606 GN=COL6A2 PE=1 SV=4        | 23                        | 15                      | 45                  | 3                              | 1019               | 108.5    | 6.21                  | 131.8                         | 15                                  |
| P12110-2  | Isoform 2C2A of Collagen alpha-2(VI) chain OS=Homo sapiens OX=9606 GN=COL6A2  | 22                        | 13                      | 41                  | 1                              | 918                | 97.4     | 5.55                  | 114.53                        | 13                                  |
| P13500    | C-C motif chemokine 2 OS=Homo sapiens OX=9606 GN=CCL2 PE=1 SV=1               | 11                        | 1                       | 9                   | 1                              | 99                 | 11       | 9.25                  | 23.7                          | 1                                   |
| P14543    | Nidogen-1 OS=Homo sapiens OX=9606 GN=NID1 PE=1 SV=3                           | 27                        | 23                      | 63                  | 22                             | 1247               | 136.3    | 5.29                  | 191.86                        | 23                                  |
| P15018    | Leukemia inhibitory factor OS=Homo sapiens OX=9606 GN=LIF PE=1 SV=1           | 6                         | 1                       | 2                   | 1                              | 202                | 22       | 9.35                  | 4.93                          | 1                                   |
| P15291    | Beta-1,4-galactosyltransferase 1 OS=Homo sapiens OX=9606 GN=B4GALT1 PE=1 SV=5 | 27                        | 6                       | 14                  | 6                              | 398                | 43.9     | 8.65                  | 44.01                         | 6                                   |
| P18206    | Vinculin OS=Homo sapiens OX=9606 GN=VCL PE=1 SV=4                             | 6                         | 5                       | 8                   | 5                              | 1134               | 123.7    | 5.66                  | 16.8                          | 5                                   |
| P19022    | Cadherin-2 OS=Homo sapiens OX=9606 GN=CDH2 PE=1 SV=4                          | 10                        | 6                       | 29                  | 6                              | 906                | 99.7     | 4.81                  | 71.12                         | 6                                   |

| Accession | Description                                                                                   | Coverage [%] <sup>a</sup> | # Peptides <sup>b</sup> | # PSMs <sup>c</sup> | # Unique Peptides <sup>d</sup> | # AAs <sup>e</sup> | MW [kDa] | Calc. pI <sup>f</sup> | Score Sequest HT <sup>g</sup> | # Peptides: Sequest HT <sup>h</sup> |
|-----------|-----------------------------------------------------------------------------------------------|---------------------------|-------------------------|---------------------|--------------------------------|--------------------|----------|-----------------------|-------------------------------|-------------------------------------|
| P19875    | C-X-C motif chemokine 2 OS=Homo sapiens OX=9606 GN=CXCL2 PE=1 SV=1                            | 37                        | 3                       | 42                  | 1                              | 107                | 11.4     | 10.55                 | 153.82                        | 3                                   |
| P19876    | C-X-C motif chemokine 3 OS=Homo sapiens OX=9606 GN=CXCL3 PE=1 SV=1                            | 38                        | 3                       | 45                  | 1                              | 107                | 11.3     | 10.37                 | 163.16                        | 3                                   |
| P20809    | Interleukin-11 OS=Homo sapiens OX=9606 GN=IL11 PE=1 SV=1                                      | 12                        | 2                       | 4                   | 2                              | 199                | 21.4     | 10.62                 | 9.49                          | 2                                   |
| P21333    | Filamin-A OS=Homo sapiens OX=9606 GN=FLNA PE=1 SV=4                                           | 15                        | 26                      | 49                  | 25                             | 2647               | 280.6    | 6.06                  | 129.45                        | 26                                  |
| P24592    | Insulin-like growth factor-binding protein 6 OS=Homo sapiens OX=9606 GN=IGFBP6 PE=1 SV=1      | 34                        | 3                       | 20                  | 3                              | 240                | 25.3     | 7.81                  | 80.38                         | 3                                   |
| P25940    | Collagen alpha-3(V) chain OS=Homo sapiens OX=9606 GN=COL5A3 PE=1 SV=3                         | 3                         | 2                       | 2                   | 2                              | 1745               | 172      | 6.87                  | 5.06                          | 2                                   |
| P26022    | Pentraxin-related protein PTX3 OS=Homo sapiens OX=9606 GN=PTX3 PE=1 SV=3                      | 47                        | 13                      | 66                  | 13                             | 381                | 41.9     | 5.01                  | 196.45                        | 13                                  |
| P28072    | Proteasome subunit beta type-6 OS=Homo sapiens OX=9606 GN=PSMB6 PE=1 SV=4                     | 5                         | 1                       | 2                   | 1                              | 239                | 25.3     | 4.92                  | 3.96                          | 1                                   |
| P30041    | Peroxiredoxin-6 OS=Homo sapiens OX=9606 GN=PRDX6 PE=1 SV=3                                    | 19                        | 3                       | 5                   | 3                              | 224                | 25       | 6.38                  | 11.11                         | 3                                   |
| P33908    | Mannosyl-oligosaccharide 1,2-alpha-mannosidase IA OS=Homo sapiens OX=9606 GN=MAN1A1 PE=1 SV=3 | 14                        | 6                       | 19                  | 6                              | 653                | 72.9     | 6.47                  | 49.28                         | 6                                   |
| P35237    | Serpin B6 OS=Homo sapiens OX=9606 GN=SERPINB6 PE=1 SV=3                                       | 4                         | 1                       | 3                   | 1                              | 376                | 42.6     | 5.27                  | 6.9                           | 1                                   |
| P35442    | Thrombospondin-2 OS=Homo sapiens OX=9606 GN=THBS2 PE=1 SV=2                                   | 23                        | 17                      | 48                  | 15                             | 1172               | 129.9    | 4.83                  | 128.18                        | 17                                  |
| P35555    | Fibrillin-1 OS=Homo sapiens OX=9606 GN=FBN1 PE=1 SV=3                                         | 25                        | 46                      | 153                 | 46                             | 2871               | 312      | 4.93                  | 410.72                        | 46                                  |
| P36955    | Pigment epithelium-derived factor OS=Homo sapiens OX=9606 GN=SERPINF1 PE=1 SV=4               | 41                        | 13                      | 44                  | 13                             | 418                | 46.3     | 6.38                  | 129.33                        | 13                                  |
| P48061    | Stromal cell-derived factor 1 OS=Homo sapiens OX=9606 GN=CXCL12 PE=1 SV=1                     | 15                        | 1                       | 3                   | 1                              | 93                 | 10.7     | 9.88                  | 10.15                         | 1                                   |
| P48307    | Tissue factor pathway inhibitor 2 OS=Homo sapiens OX=9606 GN=TFPI2 PE=1 SV=1                  | 19                        | 3                       | 8                   | 3                              | 235                | 26.9     | 8.53                  | 20.33                         | 3                                   |
| P51884    | Lumican OS=Homo sapiens OX=9606 GN=LUM PE=1 SV=2                                              | 38                        | 11                      | 82                  | 11                             | 338                | 38.4     | 6.61                  | 253.32                        | 11                                  |
| P55058    | Phospholipid transfer protein OS=Homo sapiens OX=9606 GN=PLTP PE=1 SV=1                       | 25                        | 9                       | 27                  | 9                              | 493                | 54.7     | 7.01                  | 85.47                         | 9                                   |
| P55083    | Microfibril-associated glycoprotein 4 OS=Homo sapiens OX=9606 GN=MFAP4 PE=1 SV=2              | 17                        | 3                       | 13                  | 3                              | 255                | 28.6     | 5.63                  | 47.93                         | 3                                   |
| P55290    | Cadherin-13 OS=Homo sapiens OX=9606 GN=CDH13 PE=1 SV=1                                        | 4                         | 2                       | 6                   | 2                              | 713                | 78.2     | 4.98                  | 18.77                         | 2                                   |
| P62328    | Thymosin beta-4 OS=Homo sapiens OX=9606 GN=TMSB4X PE=1 SV=2                                   | 34                        | 2                       | 2                   | 2                              | 44                 | 5.1      | 5.06                  | 4.42                          | 2                                   |
| P62857    | 40S ribosomal protein S28 OS=Homo sapiens OX=9606 GN=RPS28 PE=1 SV=1                          | 17                        | 1                       | 1                   | 1                              | 69                 | 7.8      | 10.7                  | 2.33                          | 1                                   |
| P62942    | Peptidyl-prolyl cis-trans isomerase FKBP1A OS=Homo sapiens OX=9606 GN=FKBP1A PE=1 SV=2        | 26                        | 2                       | 4                   | 2                              | 108                | 11.9     | 8.16                  | 8.87                          | 2                                   |
| P63313    | Thymosin beta-10 OS=Homo sapiens OX=9606 GN=TMSB10 PE=1 SV=2                                  | 34                        | 1                       | 3                   | 1                              | 44                 | 5        | 5.36                  | 9.69                          | 1                                   |
| P80303    | Nucleobindin-2 OS=Homo sapiens OX=9606 GN=NUCB2 PE=1 SV=3                                     | 6                         | 2                       | 4                   | 2                              | 420                | 50.2     | 5.12                  | 11.21                         | 2                                   |
| P98066    | Tumor necrosis factor-inducible gene 6 protein OS=Homo sapiens OX=9606 GN=TNFAIP6 PE=1 SV=2   | 31                        | 6                       | 23                  | 6                              | 277                | 31.2     | 6.79                  | 64.39                         | 6                                   |
| Q01995    | Transgelin OS=Homo sapiens OX=9606 GN=TAGLN PE=1 SV=4                                         | 27                        | 4                       | 11                  | 4                              | 201                | 22.6     | 8.84                  | 26.19                         | 4                                   |
| Q02388    | Collagen alpha-1(VII) chain OS=Homo sapiens OX=9606 GN=COL7A1 PE=1 SV=2                       | 3                         | 5                       | 9                   | 5                              | 2944               | 295      | 6.27                  | 23.05                         | 5                                   |

| Accession | Description                                                                                                                   | Coverage [%] <sup>a</sup> | # Peptides <sup>b</sup> | # PSMs <sup>c</sup> | # Unique Peptides <sup>d</sup> | # AAs <sup>e</sup> | MW [kDa] | Calc. pI <sup>f</sup> | Score Sequest HT <sup>g</sup> | # Peptides: Sequest HT <sup>h</sup> |
|-----------|-------------------------------------------------------------------------------------------------------------------------------|---------------------------|-------------------------|---------------------|--------------------------------|--------------------|----------|-----------------------|-------------------------------|-------------------------------------|
| Q04760    | Lactoylglutathione lyase OS=Homo sapiens OX=9606 GN=GLO1 PE=1 SV=4                                                            | 5                         | 1                       | 2                   | 1                              | 184                | 20.8     | 5.31                  | 3.81                          | 1                                   |
| Q07092    | Collagen alpha-1(XVI) chain OS=Homo sapiens OX=9606 GN=COL16A1 PE=1 SV=2                                                      | 6                         | 6                       | 6                   | 6                              | 1604               | 157.7    | 7.84                  | 14.45                         | 6                                   |
| Q07954    | Prolow-density lipoprotein receptor-related protein 1 OS=Homo sapiens OX=9606 GN=LRP1 PE=1 SV=2                               | 2                         | 4                       | 4                   | 4                              | 4544               | 504.3    | 5.39                  | 9.96                          | 4                                   |
| Q09666    | Neuroblast differentiation-associated protein AHNAK OS=Homo sapiens OX=9606 GN=AHNAK PE=1 SV=2                                | 6                         | 9                       | 11                  | 9                              | 5890               | 628.7    | 6.15                  | 24.72                         | 9                                   |
| Q10471    | Polypeptide N-acetylgalactosaminyltransferase 2 OS=Homo sapiens OX=9606 GN=GALNT2 PE=1 SV=1                                   | 5                         | 2                       | 4                   | 2                              | 571                | 64.7     | 8.35                  | 10.27                         | 2                                   |
| Q12841    | Follistatin-related protein 1 OS=Homo sapiens OX=9606 GN=FSTL1 PE=1 SV=1                                                      | 43                        | 11                      | 96                  | 11                             | 308                | 35       | 5.52                  | 314.83                        | 11                                  |
| Q13217    | DnaJ homolog subfamily C member 3 OS=Homo sapiens OX=9606 GN=DNAJC3 PE=1 SV=1                                                 | 5                         | 2                       | 4                   | 2                              | 504                | 57.5     | 6.15                  | 8.45                          | 2                                   |
| Q13219    | Pappalysin-1 OS=Homo sapiens OX=9606 GN=PAPPA PE=1 SV=3                                                                       | 5                         | 6                       | 9                   | 6                              | 1627               | 180.9    | 6.18                  | 21.79                         | 6                                   |
| Q14112    | Nidogen-2 OS=Homo sapiens OX=9606 GN=NID2 PE=1 SV=3                                                                           | 5                         | 4                       | 7                   | 3                              | 1375               | 151.2    | 5.29                  | 17.05                         | 4                                   |
| Q14315    | Filamin-C OS=Homo sapiens OX=9606 GN=FLNC PE=1 SV=3                                                                           | 4                         | 6                       | 8                   | 3                              | 2725               | 290.8    | 5.97                  | 19.6                          | 6                                   |
| Q14767    | Latent-transforming growth factor beta-binding protein 2 OS=Homo sapiens OX=9606 GN=LTBP2 PE=1 SV=3                           | 7                         | 8                       | 13                  | 8                              | 1821               | 194.9    | 5.19                  | 33.02                         | 8                                   |
| Q15063-5  | Isoform 5 of Periostin OS=Homo sapiens OX=9606 GN=POSTN                                                                       | 57                        | 28                      | 140                 | 4                              | 809                | 90.4     | 7.39                  | 464.35                        | 28                                  |
| Q15084    | Protein disulfide-isomerase A6 OS=Homo sapiens OX=9606 GN=PDIA6 PE=1 SV=1                                                     | 6                         | 2                       | 2                   | 2                              | 440                | 48.1     | 5.08                  | 4.19                          | 2                                   |
| Q15582    | Transforming growth factor-beta-induced protein ig-h3 OS=Homo sapiens OX=9606 GN=TGFB1 PE=1 SV=1                              | 48                        | 19                      | 138                 | 19                             | 683                | 74.6     | 7.71                  | 454                           | 19                                  |
| Q16270    | Insulin-like growth factor-binding protein 7 OS=Homo sapiens OX=9606 GN=IGFBP7 PE=1 SV=1                                      | 38                        | 9                       | 57                  | 9                              | 282                | 29.1     | 7.9                   | 178.9                         | 9                                   |
| Q16394    | Exostosin-1 OS=Homo sapiens OX=9606 GN=EXT1 PE=1 SV=2                                                                         | 9                         | 5                       | 8                   | 5                              | 746                | 86.2     | 9.04                  | 19.19                         | 5                                   |
| Q16658    | Fascin OS=Homo sapiens OX=9606 GN=FSCN1 PE=1 SV=3                                                                             | 6                         | 2                       | 3                   | 2                              | 493                | 54.5     | 7.24                  | 9.48                          | 2                                   |
| Q16706    | Alpha-mannosidase 2 OS=Homo sapiens OX=9606 GN=MAN2A1 PE=1 SV=2                                                               | 2                         | 2                       | 4                   | 2                              | 1144               | 131.1    | 7.58                  | 9.74                          | 2                                   |
| Q16769    | Glutaminyl-peptide cyclotransferase OS=Homo sapiens OX=9606 GN=QPCT PE=1 SV=1                                                 | 4                         | 1                       | 2                   | 1                              | 361                | 40.9     | 6.61                  | 4.47                          | 1                                   |
| Q16777    | Histone H2A type 2-C OS=Homo sapiens OX=9606 GN=HIST2H2AC PE=1 SV=4                                                           | 15                        | 1                       | 1                   | 1                              | 129                | 14       | 10.9                  | 2.16                          | 1                                   |
| Q16778    | Histone H2B type 2-E OS=Homo sapiens OX=9606 GN=HIST2H2BE PE=1 SV=3                                                           | 12                        | 1                       | 3                   | 1                              | 126                | 13.9     | 10.32                 | 9.67                          | 1                                   |
| Q2TSD0    | Glyceraldehyde-3-phosphate dehydrogenase OS=Homo sapiens OX=9606 PE=2 SV=1                                                    | 17                        | 4                       | 9                   | 4                              | 335                | 36       | 8.46                  | 23.97                         | 4                                   |
| Q4LDE5    | Sushi, von Willebrand factor type A, EGF and pentraxin domain-containing protein 1 OS=Homo sapiens OX=9606 GN=SVEP1 PE=1 SV=3 | 1                         | 1                       | 1                   | 1                              | 3571               | 389.9    | 5.5                   | 2.71                          | 1                                   |
| Q53FA4    | Cysteine-rich, angiogenic inducer, 61 variant (Fragment) OS=Homo sapiens OX=9606 PE=2 SV=1                                    | 15                        | 3                       | 6                   | 3                              | 381                | 42       | 8.31                  | 16.05                         | 3                                   |
| Q53FR6    | Cartilage oligomeric matrix protein variant (Fragment) OS=Homo sapiens OX=9606 PE=2 SV=1                                      | 17                        | 7                       | 15                  | 7                              | 757                | 82.7     | 4.61                  | 39.94                         | 7                                   |
| Q53G71    | Calreticulin variant (Fragment) OS=Homo sapiens OX=9606 PE=2 SV=1                                                             | 9                         | 2                       | 7                   | 2                              | 406                | 46.9     | 4.45                  | 18.81                         | 2                                   |
| Q53G75    | Matrix metalloproteinase 1 preproprotein variant (Fragment) OS=Homo sapiens OX=9606 PE=2 SV=1                                 | 44                        | 13                      | 59                  | 13                             | 405                | 46.5     | 7.03                  | 164.43                        | 13                                  |
| Q53G99    | Beta actin variant (Fragment) OS=Homo sapiens OX=9606 PE=2 SV=1                                                               | 50                        | 11                      | 33                  | 1                              | 375                | 41.7     | 5.59                  | 94.31                         | 11                                  |

| Accession | Description                                                                                                                     | Coverage [%] <sup>a</sup> | # Peptides <sup>b</sup> | # PSMs <sup>c</sup> | # Unique Peptides <sup>d</sup> | # AAs <sup>e</sup> | MW [kDa] | Calc. pI <sup>f</sup> | Score Sequest HT <sup>g</sup> | # Peptides: Sequest HT <sup>h</sup> |
|-----------|---------------------------------------------------------------------------------------------------------------------------------|---------------------------|-------------------------|---------------------|--------------------------------|--------------------|----------|-----------------------|-------------------------------|-------------------------------------|
| Q53GY0    | Plastin 3 variant (Fragment) OS=Homo sapiens OX=9606 PE=2 SV=1                                                                  | 16                        | 7                       | 16                  | 7                              | 630                | 70.7     | 5.68                  | 39.68                         | 7                                   |
| Q53R94    | Uncharacterized protein RTN4 (Fragment) OS=Homo sapiens OX=9606 GN=RTN4 PE=4 SV=1                                               | 7                         | 1                       | 2                   | 1                              | 185                | 19.3     | 4.13                  | 4.4                           | 1                                   |
| Q59E93    | Aminopeptidase (Fragment) OS=Homo sapiens OX=9606 PE=2 SV=1                                                                     | 5                         | 4                       | 6                   | 4                              | 977                | 110.5    | 5.53                  | 14.23                         | 4                                   |
| Q59GA0    | Thy-1 cell surface antigen variant (Fragment) OS=Homo sapiens OX=9606 PE=2 SV=1                                                 | 10                        | 1                       | 2                   | 1                              | 145                | 15.9     | 9                     | 4.22                          | 1                                   |
| Q5M8T4    | Connective tissue growth factor OS=Homo sapiens OX=9606 GN=CTGF PE=2 SV=1                                                       | 18                        | 5                       | 14                  | 5                              | 349                | 38       | 7.94                  | 33.26                         | 5                                   |
| Q5NKV8    | Intercellular adhesion molecule 1 OS=Homo sapiens OX=9606 GN=ICAM1 PE=2 SV=1                                                    | 8                         | 3                       | 7                   | 3                              | 532                | 57.8     | 7.68                  | 18.94                         | 3                                   |
| Q5T7F0    | Neuropilin OS=Homo sapiens OX=9606 GN=NRP1 PE=1 SV=1                                                                            | 6                         | 3                       | 5                   | 3                              | 704                | 79       | 5.86                  | 11.88                         | 3                                   |
| Q5UGI6    | Serine/cysteine proteinase inhibitor clade G member 1 splice variant 2 (Fragment) OS=Homo sapiens OX=9606 GN=SERPING1 PE=2 SV=1 | 8                         | 2                       | 4                   | 2                              | 333                | 37.3     | 8                     | 9.64                          | 2                                   |
| Q63HR1    | Uncharacterized protein DKFZp686P17171 OS=Homo sapiens OX=9606 GN=DKFZp686P17171 PE=2 SV=1                                      | 4                         | 1                       | 1                   | 1                              | 387                | 42.4     | 8.44                  | 3.22                          | 1                                   |
| Q641Q3    | Meteorin-like protein OS=Homo sapiens OX=9606 GN=METRNL PE=2 SV=1                                                               | 12                        | 2                       | 6                   | 2                              | 311                | 34.4     | 8.35                  | 18.33                         | 2                                   |
| Q6EMK4    | Vasorin OS=Homo sapiens OX=9606 GN=VASN PE=1 SV=1                                                                               | 13                        | 5                       | 14                  | 5                              | 673                | 71.7     | 7.39                  | 40.85                         | 5                                   |
| Q6FHC9    | STC2 protein (Fragment) OS=Homo sapiens OX=9606 GN=STC2 PE=2 SV=1                                                               | 24                        | 3                       | 7                   | 3                              | 302                | 33.2     | 7.3                   | 27.38                         | 3                                   |
| Q6FHE1    | FST protein OS=Homo sapiens OX=9606 GN=FST PE=2 SV=1                                                                            | 22                        | 4                       | 10                  | 4                              | 317                | 34.8     | 7.65                  | 26.69                         | 4                                   |
| Q6FWH3    | DF protein OS=Homo sapiens OX=9606 GN=DF PE=2 SV=1                                                                              | 28                        | 5                       | 13                  | 5                              | 228                | 24.4     | 7.24                  | 44.24                         | 5                                   |
| Q6FHZ0    | Malate dehydrogenase OS=Homo sapiens OX=9606 GN=MDH2 PE=2 SV=1                                                                  | 4                         | 1                       | 2                   | 1                              | 338                | 35.5     | 8.68                  | 4.69                          | 1                                   |
| Q6I9S7    | C-X-C motif chemokine OS=Homo sapiens OX=9606 GN=CXCL5 PE=2 SV=1                                                                | 32                        | 3                       | 8                   | 2                              | 114                | 12       | 8.88                  | 21.94                         | 3                                   |
| Q6IAW5    | CALU protein OS=Homo sapiens OX=9606 GN=CALU PE=2 SV=1                                                                          | 27                        | 5                       | 8                   | 5                              | 315                | 37.1     | 4.64                  | 24.78                         | 5                                   |
| Q6UXB8    | Peptidase inhibitor 16 OS=Homo sapiens OX=9606 GN=PI16 PE=1 SV=1                                                                | 15                        | 4                       | 22                  | 1                              | 463                | 49.4     | 5.39                  | 67.03                         | 4                                   |
| Q6YHK3    | CD109 antigen OS=Homo sapiens OX=9606 GN=CD109 PE=1 SV=2                                                                        | 7                         | 7                       | 15                  | 7                              | 1445               | 161.6    | 5.85                  | 35.32                         | 7                                   |
| Q75MU2    | Uncharacterized protein WBSCR1 (Fragment) OS=Homo sapiens OX=9606 GN=WBSCR1 PE=4 SV=1                                           | 8                         | 1                       | 1                   | 1                              | 156                | 17.1     | 5.31                  | 2.11                          | 1                                   |
| Q7Z7M9    | Polypeptide N-acetylgalactosaminyltransferase 5 OS=Homo sapiens OX=9606 GN=GALNT5 PE=1 SV=1                                     | 1                         | 1                       | 1                   | 1                              | 940                | 106.2    | 9.47                  | 2.53                          | 1                                   |
| Q86UD1    | Out at first protein homolog OS=Homo sapiens OX=9606 GN=OAF PE=2 SV=1                                                           | 14                        | 2                       | 5                   | 2                              | 273                | 30.7     | 6.84                  | 12.85                         | 2                                   |
| Q86X91    | Inactive tyrosine-protein kinase 7 OS=Homo sapiens OX=9606 GN=PTK7 PE=1 SV=1                                                    | 3                         | 1                       | 2                   | 1                              | 459                | 50.4     | 6.65                  | 5.03                          | 1                                   |
| Q86Z22    | Epididymis secretory protein Li 297 OS=Homo sapiens OX=9606 GN=HEL-S-297 PE=2 SV=1                                              | 7                         | 1                       | 3                   | 1                              | 226                | 23.8     | 9.06                  | 11.41                         | 1                                   |
| Q8IUX7    | Adipocyte enhancer-binding protein 1 OS=Homo sapiens OX=9606 GN=AEBP1 PE=1 SV=1                                                 | 13                        | 10                      | 24                  | 10                             | 1158               | 130.8    | 5.11                  | 63.62                         | 10                                  |
| Q8NBP7    | Proprotein convertase subtilisin/kexin type 9 OS=Homo sapiens OX=9606 GN=PCSK9 PE=1 SV=3                                        | 18                        | 6                       | 13                  | 6                              | 692                | 74.2     | 6.61                  | 35.37                         | 6                                   |
| Q92520    | Protein FAM3C OS=Homo sapiens OX=9606 GN=FAM3C PE=1 SV=1                                                                        | 26                        | 4                       | 11                  | 4                              | 227                | 24.7     | 8.29                  | 28.26                         | 4                                   |
| Q92626    | Peroxidasin homolog OS=Homo sapiens OX=9606 GN=PXDN PE=1 SV=2                                                                   | 19                        | 17                      | 33                  | 17                             | 1479               | 165.2    | 7.17                  | 97.04                         | 17                                  |

| Accession | Description                                                                                      | Coverage [%] <sup>a</sup> | # Peptides <sup>b</sup> | # PSMs <sup>c</sup> | # Unique Peptides <sup>d</sup> | # AAs <sup>e</sup> | MW [kDa] | Calc. pI <sup>f</sup> | Score Sequest HT <sup>g</sup> | # Peptides: Sequest HT <sup>h</sup> |
|-----------|--------------------------------------------------------------------------------------------------|---------------------------|-------------------------|---------------------|--------------------------------|--------------------|----------|-----------------------|-------------------------------|-------------------------------------|
| Q92820    | Gamma-glutamyl hydrolase OS=Homo sapiens OX=9606 GN=GGH PE=1 SV=2                                | 4                         | 1                       | 1                   | 1                              | 318                | 35.9     | 7.11                  | 1.94                          | 1                                   |
| Q96CE4    | Stathmin OS=Homo sapiens OX=9606 GN=STMN1 PE=1 SV=1                                              | 9                         | 1                       | 3                   | 1                              | 149                | 17.3     | 5.97                  | 7.77                          | 1                                   |
| Q99715    | Collagen alpha-1(XII) chain OS=Homo sapiens OX=9606 GN=COL12A1 PE=1 SV=2                         | 35                        | 68                      | 209                 | 68                             | 3063               | 332.9    | 5.53                  | 587.83                        | 68                                  |
| Q9BUD6    | Spondin-2 OS=Homo sapiens OX=9606 GN=SPON2 PE=1 SV=3                                             | 13                        | 3                       | 5                   | 3                              | 331                | 35.8     | 5.52                  | 11.08                         | 3                                   |
| V9HW74    | Ubiquitin carboxyl-terminal hydrolase OS=Homo sapiens OX=9606 GN=HEL-117 PE=2 SV=1               | 16                        | 2                       | 5                   | 2                              | 223                | 24.8     | 5.48                  | 15.46                         | 2                                   |
| V9HWB4    | Epididymis secretory sperm binding protein Li 89n OS=Homo sapiens OX=9606 GN=HEL-S-89n PE=2 SV=1 | 18                        | 8                       | 20                  | 7                              | 654                | 72.3     | 5.16                  | 53.41                         | 8                                   |
| V9HWC6    | Peptidyl-prolyl cis-trans isomerase OS=Homo sapiens OX=9606 GN=HEL-S-39 PE=2 SV=1                | 28                        | 5                       | 13                  | 5                              | 208                | 22.7     | 9.32                  | 32.09                         | 5                                   |
| V9HWF4    | Phosphoglycerate kinase OS=Homo sapiens OX=9606 GN=HEL-S-68p PE=2 SV=1                           | 4                         | 1                       | 2                   | 1                              | 417                | 44.6     | 8.1                   | 5.43                          | 1                                   |
| V9HWI5    | Cofilin 1 (Non-muscle), isoform CRA_b OS=Homo sapiens OX=9606 GN=HEL-S-15 PE=2 SV=1              | 8                         | 1                       | 2                   | 1                              | 166                | 18.5     | 8.09                  | 4.63                          | 1                                   |
| V9HWK1    | Triosephosphate isomerase OS=Homo sapiens OX=9606 GN=HEL-S-49 PE=2 SV=1                          | 32                        | 5                       | 14                  | 5                              | 249                | 26.7     | 6.9                   | 38.02                         | 5                                   |
| V9HWN7    | Fructose-bisphosphate aldolase OS=Homo sapiens OX=9606 GN=HEL-S-87p PE=2 SV=1                    | 30                        | 6                       | 15                  | 5                              | 364                | 39.4     | 8.09                  | 42.41                         | 6                                   |
| V9HWP2    | Epididymis luminal protein 35 OS=Homo sapiens OX=9606 GN=HEL-S-125m PE=2 SV=1                    | 5                         | 3                       | 4                   | 2                              | 803                | 92.4     | 4.84                  | 9.04                          | 3                                   |

<sup>a</sup>Coverage is the percentage of the sequence covered by identifications (PSMs only) from the included searches. <sup>b</sup># Peptides is the number of distinct peptide sequences in the protein. <sup>c</sup># PSMs is number of identified peptide spectrum matches identified from all included searches, including those redundantly identified. <sup>d</sup># Unique peptide is the total number of distinct peptide sequences unique to the protein group. <sup>e</sup>#AAs is length of the protein sequence. <sup>f</sup>Calc pI (isoelectric point) number is theoretically calculated isoelectric point for the protein that is, the pH at which a particular molecule carries no net electrical charge. <sup>g</sup>Score Sequest HT is a protein score calculated by summing the individual scores for each peptide. The higher this score, the higher the individual score of the peptide, allowing for better identification. <sup>h</sup># Peptides: Sequest HT is the number of distinct peptide sequences in the identified protein.

Supplementary Table 1-5: Detailed information on commonly secreted proteins by 3 synovial membrane (SM) mesenchymal stem cells (MSCs) under normal condition.

| Accession  | Description                                                                                                                                                | Coverage [%] <sup>a</sup> | # Peptides <sup>b</sup> | # PSMs <sup>c</sup> | # Unique Peptides <sup>d</sup> | # AAs <sup>e</sup> | MW [kDa] | Calc. pI <sup>f</sup> | Score Sequest HT <sup>g</sup> | # Peptides: Sequest HT <sup>h</sup> |
|------------|------------------------------------------------------------------------------------------------------------------------------------------------------------|---------------------------|-------------------------|---------------------|--------------------------------|--------------------|----------|-----------------------|-------------------------------|-------------------------------------|
| A0A024QYT5 | Serpin peptidase inhibitor, clade E (Nexin, plasminogen activator inhibitor type 1), member 1, isoform CRA_b OS=Homo sapiens OX=9606 GN=SERPINE1 PE=3 SV=1 | 29                        | 9                       | 17                  | 9                              | 402                | 45       | 7.2                   | 42.88                         | 9                                   |
| A0A024R1U8 | Insulin-like growth factor binding protein 4, isoform CRA_a OS=Homo sapiens OX=9606 GN=IGFBP4 PE=4 SV=1                                                    | 29                        | 4                       | 25                  | 4                              | 258                | 27.9     | 7.15                  | 68.59                         | 4                                   |
| A0A024R2W4 | Dystroglycan 1 (Dystrophin-associated glycoprotein 1), isoform CRA_a OS=Homo sapiens OX=9606 GN=DAG1 PE=4 SV=1                                             | 2                         | 1                       | 3                   | 1                              | 895                | 97.5     | 8.56                  | 8.99                          | 1                                   |
| A0A024R319 | Laminin, beta 2 (Laminin S), isoform CRA_a OS=Homo sapiens OX=9606 GN=LAMB2 PE=4 SV=1                                                                      | 7                         | 6                       | 6                   | 6                              | 1798               | 195.9    | 6.52                  | 10.83                         | 6                                   |
| A0A024R433 | Insulin-like growth factor binding protein 5, isoform CRA_a OS=Homo sapiens OX=9606 GN=IGFBP5 PE=4 SV=1                                                    | 27                        | 5                       | 41                  | 5                              | 272                | 30.6     | 8.21                  | 114.04                        | 5                                   |
| A0A024R462 | Fibronectin 1, isoform CRA_n OS=Homo sapiens OX=9606 GN=FN1 PE=4 SV=1                                                                                      | 55                        | 68                      | 413                 | 3                              | 2355               | 259      | 5.73                  | 1234.77                       | 68                                  |
| A0A024R498 | Serpin peptidase inhibitor, clade E (Nexin, plasminogen activator inhibitor type 1), member 2, isoform CRA_b OS=Homo sapiens OX=9606 GN=SERPINE2 PE=3 SV=1 | 26                        | 6                       | 15                  | 6                              | 397                | 44       | 9.38                  | 39.53                         | 6                                   |
| A0A024R6R4 | Matrix metalloproteinase 2 (Gelatinase A, 72kDa gelatinase, 72kDa type IV collagenase), isoform CRA_a OS=Homo sapiens OX=9606 GN=MMP2 PE=3 SV=1            | 47                        | 18                      | 59                  | 18                             | 660                | 73.8     | 5.47                  | 163.2                         | 18                                  |
| A0A024R8E5 | Collagen, type V, alpha 1, isoform CRA_a OS=Homo sapiens OX=9606 GN=COL5A1 PE=4 SV=1                                                                       | 7                         | 6                       | 18                  | 6                              | 1838               | 183.4    | 5.06                  | 51.67                         | 6                                   |
| A0A024R8V7 | TIMP metalloproteinase inhibitor 2, isoform CRA_b OS=Homo sapiens OX=9606 GN=TIMP2 PE=4 SV=1                                                               | 37                        | 4                       | 22                  | 4                              | 179                | 20.2     | 7.17                  | 60.63                         | 4                                   |
| A0A024R962 | HCG40889, isoform CRA_b OS=Homo sapiens OX=9606 GN=hCG_40889 PE=4 SV=1                                                                                     | 3                         | 2                       | 2                   | 2                              | 1231               | 139      | 6.62                  | 4.93                          | 2                                   |
| A0A024R969 | Chitinase 3-like 1 (Cartilage glycoprotein-39), isoform CRA_a OS=Homo sapiens OX=9606 GN=CHI3L1 PE=3 SV=1                                                  | 40                        | 11                      | 31                  | 11                             | 383                | 42.6     | 8.46                  | 80.05                         | 11                                  |
| A0A024RDW8 | Collagen, type IV, alpha 2, isoform CRA_a OS=Homo sapiens OX=9606 GN=COL4A2 PE=4 SV=1                                                                      | 8                         | 7                       | 11                  | 7                              | 1712               | 167.4    | 8.66                  | 26.63                         | 7                                   |
| A0A087WTA8 | Collagen alpha-2(I) chain OS=Homo sapiens OX=9606 GN=COL1A2 PE=1 SV=1                                                                                      | 57                        | 44                      | 486                 | 44                             | 1364               | 129.1    | 9.01                  | 1443.37                       | 44                                  |
| A0A087WY35 | Integrin beta-like protein 1 OS=Homo sapiens OX=9606 GN=ITGBL1 PE=1 SV=1                                                                                   | 7                         | 1                       | 1                   | 1                              | 445                | 48.5     | 5.4                   | 2.71                          | 1                                   |
| A0A087X0S5 | Collagen alpha-1(VI) chain OS=Homo sapiens OX=9606 GN=COL6A1 PE=1 SV=1                                                                                     | 38                        | 21                      | 106                 | 21                             | 1026               | 108.3    | 5.43                  | 308.92                        | 21                                  |
| A0A0A0MT01 | Gelsolin OS=Homo sapiens OX=9606 GN=GSN PE=1 SV=1                                                                                                          | 10                        | 4                       | 8                   | 4                              | 767                | 84.7     | 5.83                  | 19.96                         | 4                                   |
| A0A0F7G8J1 | Plasminogen OS=Homo sapiens OX=9606 GN=PLG PE=2 SV=1                                                                                                       | 1                         | 1                       | 3                   | 1                              | 809                | 90.6     | 7.36                  | 7.17                          | 1                                   |
| A0A140VJI7 | Testicular tissue protein Li 61 OS=Homo sapiens OX=9606 PE=2 SV=1                                                                                          | 11                        | 4                       | 6                   | 4                              | 540                | 60.6     | 6.71                  | 16.86                         | 4                                   |
| A0A161I202 | Lactoferrin OS=Homo sapiens OX=9606 GN=LTF PE=2 SV=1                                                                                                       | 3                         | 2                       | 6                   | 2                              | 711                | 78.3     | 8.18                  | 12.53                         | 2                                   |
| A0A172Q381 | Endosialin (Fragment) OS=Homo sapiens OX=9606 GN=TEM1 PE=2 SV=1                                                                                            | 4                         | 2                       | 2                   | 2                              | 668                | 71.2     | 5.01                  | 4.2                           | 2                                   |
| A0AV88     | ADAM10 protein OS=Homo sapiens OX=9606 GN=ADAM10 PE=2 SV=1                                                                                                 | 3                         | 1                       | 1                   | 1                              | 512                | 57.9     | 7.2                   | 2.63                          | 1                                   |
| A1L4H1     | Soluble scavenger receptor cysteine-rich domain-containing protein SSC5D OS=Homo sapiens OX=9606 GN=SSC5D PE=1 SV=3                                        | 1                         | 1                       | 2                   | 1                              | 1573               | 165.6    | 6.13                  | 4.36                          | 1                                   |
| A4D2D2     | Procollagen C-endopeptidase enhancer OS=Homo sapiens OX=9606 GN=PCOLCE PE=4 SV=1                                                                           | 27                        | 9                       | 21                  | 9                              | 449                | 47.9     | 7.43                  | 52.52                         | 9                                   |
| A6XND1     | Insulin-like growth factor binding protein 3 isoform b OS=Homo sapiens OX=9606 GN=IGFBP3 PE=1 SV=1                                                         | 30                        | 5                       | 15                  | 5                              | 263                | 29       | 8.46                  | 38.71                         | 5                                   |
| A8K2H4     | cDNA FLJ78235 OS=Homo sapiens OX=9606 PE=2 SV=1                                                                                                            | 17                        | 4                       | 5                   | 4                              | 339                | 37.8     | 6.3                   | 13.52                         | 4                                   |
| A8K7Q1     | cDNA FLJ77770, highly similar to Homo sapiens nucleobindin 1 (NUCB1), mRNA OS=Homo sapiens OX=9606 PE=2 SV=1                                               | 23                        | 6                       | 14                  | 6                              | 461                | 53.9     | 5.25                  | 40.81                         | 6                                   |

| Accession | Description                                                                                                                                                                                         | Coverage [%] <sup>a</sup> | # Peptides <sup>b</sup> | # PSMs <sup>c</sup> | # Unique Peptides <sup>d</sup> | # AAs <sup>e</sup> | MW [kDa] | Calc. pI <sup>f</sup> | Score Sequest HT <sup>g</sup> | # Peptides: Sequest HT <sup>h</sup> |
|-----------|-----------------------------------------------------------------------------------------------------------------------------------------------------------------------------------------------------|---------------------------|-------------------------|---------------------|--------------------------------|--------------------|----------|-----------------------|-------------------------------|-------------------------------------|
| A8KAJ3    | cDNA FLJ77823, highly similar to Homo sapiens EGF-containing fibulin-like extracellular matrix protein 1, transcript variant 3, mRNA OS=Homo sapiens OX=9606 PE=2 SV=1                              | 46                        | 16                      | 70                  | 16                             | 493                | 54.6     | 5.14                  | 196.55                        | 16                                  |
| B2R582    | cDNA, FLJ92374, highly similar to Homo sapiens C-type lectin domain family 3, member B (CLEC3B), mRNA OS=Homo sapiens OX=9606 PE=2 SV=1                                                             | 49                        | 7                       | 19                  | 7                              | 202                | 22.5     | 6.04                  | 46.94                         | 7                                   |
| B2R5M9    | cDNA, FLJ92537, highly similar to Homo sapiens procollagen-lysine, 2-oxoglutarate 5-dioxygenase (lysine hydroxylase, Ehlers-Danlos syndrome type VI) (PLOD), mRNA OS=Homo sapiens OX=9606 PE=2 SV=1 | 3                         | 2                       | 4                   | 2                              | 727                | 83.5     | 7.02                  | 8.59                          | 2                                   |
| B2R950    | cDNA, FLJ94213, highly similar to Homo sapiens pregnancy-zone protein (PZP), mRNA OS=Homo sapiens OX=9606 PE=2 SV=1                                                                                 | 1                         | 2                       | 3                   | 1                              | 1482               | 163.8    | 6.38                  | 6.99                          | 2                                   |
| B2RBS8    | cDNA, FLJ95666, highly similar to Homo sapiens albumin (ALB), mRNA OS=Homo sapiens OX=9606 PE=2 SV=1                                                                                                | 4                         | 3                       | 25                  | 3                              | 609                | 69.3     | 6.28                  | 59.38                         | 3                                   |
| B2RCM5    | cDNA, FLJ96160, highly similar to Homo sapiens EGF-containing fibulin-like extracellular matrix protein 2 (EFEMP2), mRNA OS=Homo sapiens OX=9606 PE=2 SV=1                                          | 6                         | 2                       | 2                   | 2                              | 443                | 49.3     | 4.94                  | 3.93                          | 2                                   |
| B2RDW0    | cDNA, FLJ96792, highly similar to Homo sapiens calmodulin 2 (phosphorylase kinase, delta) (CALM2), mRNA OS=Homo sapiens OX=9606 PE=2 SV=1                                                           | 21                        | 2                       | 4                   | 2                              | 149                | 16.8     | 4.22                  | 12.03                         | 2                                   |
| B4DDQ2    | Biglycan OS=Homo sapiens OX=9606 PE=2 SV=1                                                                                                                                                          | 34                        | 9                       | 38                  | 9                              | 334                | 37.6     | 7.97                  | 107.39                        | 9                                   |
| B4DID6    | cDNA FLJ52545, highly similar to Dickkopf-related protein 3 OS=Homo sapiens OX=9606 PE=2 SV=1                                                                                                       | 11                        | 2                       | 2                   | 2                              | 364                | 39.8     | 4.67                  | 4.72                          | 2                                   |
| B4DNG0    | cDNA FLJ58142, highly similar to Olfactomedin-like protein 3 OS=Homo sapiens OX=9606 GN=OLFML3 PE=1 SV=1                                                                                            | 9                         | 2                       | 3                   | 2                              | 345                | 39       | 6.11                  | 7.29                          | 2                                   |
| B4DPH4    | cDNA FLJ58778, highly similar to Plasminogen OS=Homo sapiens OX=9606 PE=2 SV=1                                                                                                                      | 4                         | 1                       | 1                   | 1                              | 407                | 44.9     | 7.46                  | 2.51                          | 1                                   |
| B4DPN0    | cDNA FLJ51265, moderately similar to Beta-2-glycoprotein 1 (Beta-2-glycoprotein I) OS=Homo sapiens OX=9606 PE=2 SV=1                                                                                | 3                         | 1                       | 1                   | 1                              | 274                | 30.3     | 7.85                  | 1.9                           | 1                                   |
| B4DPQ0    | Complement C1r subcomponent OS=Homo sapiens OX=9606 GN=C1R PE=1 SV=1                                                                                                                                | 22                        | 9                       | 25                  | 9                              | 719                | 81.8     | 6.37                  | 77.12                         | 9                                   |
| B4DPZ5    | cDNA FLJ53495, highly similar to Polymerase I and transcript release factor OS=Homo sapiens OX=9606 PE=2 SV=1                                                                                       | 8                         | 2                       | 2                   | 2                              | 363                | 40.5     | 5.25                  | 5.08                          | 2                                   |
| B4DRT4    | cDNA FLJ51535, highly similar to Phosphatidylethanolamine-binding protein 1 OS=Homo sapiens OX=9606 PE=2 SV=1                                                                                       | 22                        | 2                       | 2                   | 2                              | 155                | 17.3     | 6                     | 4.13                          | 2                                   |
| B4DU16    | cDNA FLJ54550, highly similar to Homo sapiens fibronectin 1 (FN1), transcript variant 6, mRNA OS=Homo sapiens OX=9606 PE=2 SV=1                                                                     | 61                        | 28                      | 182                 | 1                              | 894                | 98.1     | 6.24                  | 543.36                        | 28                                  |
| B4E324    | cDNA FLJ60397, highly similar to Lysosomal protective protein OS=Homo sapiens OX=9606 PE=2 SV=1                                                                                                     | 3                         | 1                       | 1                   | 1                              | 480                | 54.2     | 6.98                  | 2.7                           | 1                                   |
| B4E3Q1    | cDNA FLJ61580, highly similar to Calsyntenin-1 OS=Homo sapiens OX=9606 PE=2 SV=1                                                                                                                    | 9                         | 5                       | 5                   | 5                              | 962                | 107.7    | 4.97                  | 12.13                         | 5                                   |
| D0PNI2    | Lysyl oxidase OS=Homo sapiens OX=9606 GN=LOX PE=4 SV=1                                                                                                                                              | 3                         | 1                       | 1                   | 1                              | 417                | 46.9     | 8.09                  | 1.94                          | 1                                   |
| D1MGQ2    | Alpha-2 globin chain OS=Homo sapiens OX=9606 GN=HBA2 PE=3 SV=1                                                                                                                                      | 22                        | 2                       | 5                   | 2                              | 142                | 15.2     | 8.68                  | 14.81                         | 2                                   |
| D3DNU8    | Kininogen 1, isoform CRA_a OS=Homo sapiens OX=9606 GN=KNG1 PE=4 SV=1                                                                                                                                | 2                         | 1                       | 2                   | 1                              | 427                | 47.8     | 6.65                  | 4.19                          | 1                                   |
| D3DTX7    | Collagen, type I, alpha 1, isoform CRA_a OS=Homo sapiens OX=9606 GN=COL1A1 PE=4 SV=1                                                                                                                | 63                        | 31                      | 212                 | 2                              | 885                | 84.7     | 6.24                  | 622.06                        | 31                                  |
| D3YTG3    | Target of Nesh-SH3 OS=Homo sapiens OX=9606 GN=ABI3BP PE=1 SV=1                                                                                                                                      | 4                         | 5                       | 9                   | 5                              | 1777               | 195.2    | 9.73                  | 22.08                         | 5                                   |
| D6RD99    | Scrapie-responsive protein 1 OS=Homo sapiens OX=9606 GN=SCRG1 PE=1 SV=1                                                                                                                             | 20                        | 1                       | 1                   | 1                              | 92                 | 10.5     | 7.31                  | 2.25                          | 1                                   |
| D6RF35    | Vitamin D-binding protein OS=Homo sapiens OX=9606 GN=GC PE=1 SV=1                                                                                                                                   | 8                         | 2                       | 7                   | 2                              | 476                | 53       | 5.52                  | 22.05                         | 2                                   |
| D9ZGG2    | Vitronectin OS=Homo sapiens OX=9606 GN=VTN PE=4 SV=1                                                                                                                                                | 3                         | 1                       | 1                   | 1                              | 478                | 54.3     | 5.8                   | 2.54                          | 1                                   |
| E5RJA8    | Carboxypeptidase Q (Fragment) OS=Homo sapiens OX=9606 GN=CPQ PE=1 SV=1                                                                                                                              | 6                         | 1                       | 1                   | 1                              | 186                | 20.7     | 8.56                  | 1.91                          | 1                                   |

| Accession | Description                                                                                                 | Coverage [%] <sup>a</sup> | # Peptides <sup>b</sup> | # PSMs <sup>c</sup> | # Unique Peptides <sup>d</sup> | # AAs <sup>e</sup> | MW [kDa] | Calc. pI <sup>f</sup> | Score Sequest HT <sup>g</sup> | # Peptides: Sequest HT <sup>h</sup> |
|-----------|-------------------------------------------------------------------------------------------------------------|---------------------------|-------------------------|---------------------|--------------------------------|--------------------|----------|-----------------------|-------------------------------|-------------------------------------|
| E7EUF1    | Ectonucleotide pyrophosphatase/phosphodiesterase family member 2 OS=Homo sapiens OX=9606 GN=ENPP2 PE=1 SV=1 | 5                         | 3                       | 5                   | 3                              | 884                | 101.5    | 7.53                  | 12.94                         | 3                                   |
| E9PL83    | ADM OS=Homo sapiens OX=9606 GN=ADM PE=1 SV=1                                                                | 10                        | 1                       | 1                   | 1                              | 138                | 15       | 10.76                 | 2.22                          | 1                                   |
| F8VR42    | Dynein regulatory complex subunit 2 (Fragment) OS=Homo sapiens OX=9606 GN=CCDC65 PE=1 SV=1                  | 3                         | 1                       | 5                   | 1                              | 373                | 44       | 9.25                  | 9.76                          | 1                                   |
| F8W6I7    | Heterogeneous nuclear ribonucleoprotein A1 OS=Homo sapiens OX=9606 GN=HNRNPA1 PE=1 SV=2                     | 3                         | 1                       | 3                   | 1                              | 307                | 33.1     | 9.13                  | 6.57                          | 1                                   |
| H0YGS3    | Microfibrillar-associated protein 5 (Fragment) OS=Homo sapiens OX=9606 GN=MFAP5 PE=1 SV=1                   | 34                        | 2                       | 6                   | 2                              | 79                 | 9.4      | 9.47                  | 16.69                         | 2                                   |
| H6VRF8    | Keratin 1 OS=Homo sapiens OX=9606 GN=KRT1 PE=3 SV=1                                                         | 11                        | 6                       | 10                  | 5                              | 644                | 66       | 8.12                  | 21.4                          | 6                                   |
| H7BZJ3    | Protein disulfide-isomerase A3 (Fragment) OS=Homo sapiens OX=9606 GN=PDIA3 PE=1 SV=1                        | 20                        | 2                       | 2                   | 1                              | 123                | 13.5     | 7.3                   | 4.03                          | 2                                   |
| H7C0V9    | Amyloid-beta A4 protein (Fragment) OS=Homo sapiens OX=9606 GN=APP PE=1 SV=1                                 | 2                         | 1                       | 2                   | 1                              | 485                | 55.1     | 4.82                  | 4.82                          | 1                                   |
| I4AY87    | Macrophage migration inhibitory factor (Fragment) OS=Homo sapiens OX=9606 GN=MIF PE=1 SV=1                  | 8                         | 1                       | 2                   | 1                              | 115                | 12.5     | 7.88                  | 4.33                          | 1                                   |
| O00391    | Sulfhydryl oxidase 1 OS=Homo sapiens OX=9606 GN=QSOX1 PE=1 SV=3                                             | 21                        | 10                      | 22                  | 10                             | 747                | 82.5     | 8.92                  | 56.21                         | 10                                  |
| O76076    | WNT1-inducible-signaling pathway protein 2 OS=Homo sapiens OX=9606 GN=WISP2 PE=1 SV=1                       | 7                         | 1                       | 2                   | 1                              | 250                | 26.8     | 7.88                  | 5.16                          | 1                                   |
| P00338    | L-lactate dehydrogenase A chain OS=Homo sapiens OX=9606 GN=LDHA PE=1 SV=2                                   | 8                         | 2                       | 4                   | 2                              | 332                | 36.7     | 8.27                  | 9.09                          | 2                                   |
| P00441    | Superoxide dismutase [Cu-Zn] OS=Homo sapiens OX=9606 GN=SOD1 PE=1 SV=2                                      | 16                        | 1                       | 2                   | 1                              | 154                | 15.9     | 6.13                  | 5.53                          | 1                                   |
| P01008    | Antithrombin-III OS=Homo sapiens OX=9606 GN=SERPINC1 PE=1 SV=1                                              | 4                         | 2                       | 3                   | 2                              | 464                | 52.6     | 6.71                  | 6.97                          | 2                                   |
| P01023    | Alpha-2-macroglobulin OS=Homo sapiens OX=9606 GN=A2M PE=1 SV=3                                              | 1                         | 2                       | 5                   | 1                              | 1474               | 163.2    | 6.46                  | 10.33                         | 2                                   |
| P01024    | Complement C3 OS=Homo sapiens OX=9606 GN=C3 PE=1 SV=2                                                       | 1                         | 1                       | 1                   | 1                              | 1663               | 187      | 6.4                   | 2.66                          | 1                                   |
| P01033    | Metalloproteinase inhibitor 1 OS=Homo sapiens OX=9606 GN=TIMP1 PE=1 SV=1                                    | 50                        | 6                       | 33                  | 6                              | 207                | 23.2     | 8.1                   | 112.85                        | 6                                   |
| P01034    | Cystatin-C OS=Homo sapiens OX=9606 GN=CST3 PE=1 SV=1                                                        | 30                        | 3                       | 7                   | 3                              | 146                | 15.8     | 8.75                  | 16.82                         | 3                                   |
| P02452    | Collagen alpha-1(I) chain OS=Homo sapiens OX=9606 GN=COL1A1 PE=1 SV=5                                       | 47                        | 38                      | 223                 | 9                              | 1464               | 138.9    | 5.8                   | 631.24                        | 38                                  |
| P02461    | Collagen alpha-1(III) chain OS=Homo sapiens OX=9606 GN=COL3A1 PE=1 SV=4                                     | 28                        | 28                      | 81                  | 28                             | 1466               | 138.5    | 6.61                  | 209.29                        | 28                                  |
| P02647    | Apolipoprotein A-I OS=Homo sapiens OX=9606 GN=APOA1 PE=1 SV=1                                               | 6                         | 1                       | 2                   | 1                              | 267                | 30.8     | 5.76                  | 5                             | 1                                   |
| P05387    | 60S acidic ribosomal protein P2 OS=Homo sapiens OX=9606 GN=RPLP2 PE=1 SV=1                                  | 11                        | 1                       | 1                   | 1                              | 115                | 11.7     | 4.54                  | 2.18                          | 1                                   |
| P05997    | Collagen alpha-2(V) chain OS=Homo sapiens OX=9606 GN=COL5A2 PE=1 SV=3                                       | 15                        | 13                      | 26                  | 13                             | 1499               | 144.8    | 6.46                  | 66.89                         | 13                                  |
| P07585    | Decorin OS=Homo sapiens OX=9606 GN=DCN PE=1 SV=1                                                            | 38                        | 10                      | 39                  | 10                             | 359                | 39.7     | 8.54                  | 105.71                        | 10                                  |
| P07737    | Profilin-1 OS=Homo sapiens OX=9606 GN=PFN1 PE=1 SV=2                                                        | 30                        | 3                       | 7                   | 3                              | 140                | 15       | 8.27                  | 16.32                         | 3                                   |
| P07942    | Laminin subunit beta-1 OS=Homo sapiens OX=9606 GN=LAMB1 PE=1 SV=2                                           | 4                         | 5                       | 5                   | 5                              | 1786               | 197.9    | 4.94                  | 9.74                          | 5                                   |
| P07996    | Thrombospondin-1 OS=Homo sapiens OX=9606 GN=THBS1 PE=1 SV=2                                                 | 20                        | 17                      | 33                  | 15                             | 1170               | 129.3    | 4.94                  | 71.58                         | 17                                  |
| P08670    | Vimentin OS=Homo sapiens OX=9606 GN=VIM PE=1 SV=4                                                           | 29                        | 13                      | 35                  | 13                             | 466                | 53.6     | 5.12                  | 84.34                         | 13                                  |



| Accession | Description                                                                              | Coverage [%] <sup>a</sup> | # Peptides <sup>b</sup> | # PSMs <sup>c</sup> | # Unique Peptides <sup>d</sup> | # AAs <sup>e</sup> | MW [kDa] | Calc. pI <sup>f</sup> | Score Sequest HT <sup>g</sup> | # Peptides: Sequest HT <sup>h</sup> |
|-----------|------------------------------------------------------------------------------------------|---------------------------|-------------------------|---------------------|--------------------------------|--------------------|----------|-----------------------|-------------------------------|-------------------------------------|
| P08697    | Alpha-2-antiplasmin OS=Homo sapiens OX=9606 GN=SERPINF2 PE=1 SV=3                        | 2                         | 1                       | 3                   | 1                              | 491                | 54.5     | 6.29                  | 6.87                          | 1                                   |
| P09382    | Galectin-1 OS=Homo sapiens OX=9606 GN=LGALS1 PE=1 SV=2                                   | 35                        | 3                       | 6                   | 3                              | 135                | 14.7     | 5.5                   | 14.15                         | 3                                   |
| P09486    | SPARC OS=Homo sapiens OX=9606 GN=SPARC PE=1 SV=1                                         | 56                        | 13                      | 143                 | 2                              | 303                | 34.6     | 4.84                  | 466.48                        | 13                                  |
| P09871    | Complement C1s subcomponent OS=Homo sapiens OX=9606 GN=C1S PE=1 SV=1                     | 27                        | 12                      | 25                  | 12                             | 688                | 76.6     | 4.96                  | 61.74                         | 12                                  |
| P10599    | Thioredoxin OS=Homo sapiens OX=9606 GN=TXN PE=1 SV=3                                     | 12                        | 1                       | 2                   | 1                              | 105                | 11.7     | 4.92                  | 4.01                          | 1                                   |
| P11047    | Laminin subunit gamma-1 OS=Homo sapiens OX=9606 GN=LAMC1 PE=1 SV=3                       | 9                         | 9                       | 19                  | 9                              | 1609               | 177.5    | 5.12                  | 46.3                          | 9                                   |
| P12110    | Collagen alpha-2(VI) chain OS=Homo sapiens OX=9606 GN=COL6A2 PE=1 SV=4                   | 17                        | 11                      | 25                  | 11                             | 1019               | 108.5    | 6.21                  | 73.86                         | 11                                  |
| P14543    | Nidogen-1 OS=Homo sapiens OX=9606 GN=NID1 PE=1 SV=3                                      | 9                         | 7                       | 11                  | 7                              | 1247               | 136.3    | 5.29                  | 26.2                          | 7                                   |
| P18206    | Vinculin OS=Homo sapiens OX=9606 GN=VCL PE=1 SV=4                                        | 3                         | 3                       | 4                   | 3                              | 1134               | 123.7    | 5.66                  | 7.79                          | 3                                   |
| P21333    | Filamin-A OS=Homo sapiens OX=9606 GN=FLNA PE=1 SV=4                                      | 7                         | 11                      | 14                  | 11                             | 2647               | 280.6    | 6.06                  | 34.19                         | 11                                  |
| P24592    | Insulin-like growth factor-binding protein 6 OS=Homo sapiens OX=9606 GN=IGFBP6 PE=1 SV=1 | 24                        | 3                       | 10                  | 3                              | 240                | 25.3     | 7.81                  | 30.63                         | 3                                   |
| P26022    | Pentraxin-related protein PTX3 OS=Homo sapiens OX=9606 GN=PTX3 PE=1 SV=3                 | 39                        | 11                      | 42                  | 11                             | 381                | 41.9     | 5.01                  | 109.86                        | 11                                  |
| P30041    | Peroxiredoxin-6 OS=Homo sapiens OX=9606 GN=PRDX6 PE=1 SV=3                               | 15                        | 2                       | 2                   | 2                              | 224                | 25       | 6.38                  | 4.52                          | 2                                   |
| P35442    | Thrombospondin-2 OS=Homo sapiens OX=9606 GN=THBS2 PE=1 SV=2                              | 17                        | 13                      | 21                  | 11                             | 1172               | 129.9    | 4.83                  | 54.8                          | 13                                  |
| P35527    | Keratin, type I cytoskeletal 9 OS=Homo sapiens OX=9606 GN=KRT9 PE=1 SV=3                 | 3                         | 1                       | 2                   | 1                              | 623                | 62       | 5.24                  | 5.76                          | 1                                   |
| P35555    | Fibrillin-1 OS=Homo sapiens OX=9606 GN=FBN1 PE=1 SV=3                                    | 12                        | 25                      | 48                  | 25                             | 2871               | 312      | 4.93                  | 125.72                        | 25                                  |
| P36955    | Pigment epithelium-derived factor OS=Homo sapiens OX=9606 GN=SERPINF1 PE=1 SV=4          | 9                         | 4                       | 6                   | 4                              | 418                | 46.3     | 6.38                  | 17.75                         | 4                                   |
| P48061    | Stromal cell-derived factor 1 OS=Homo sapiens OX=9606 GN=CXCL12 PE=1 SV=1                | 15                        | 1                       | 3                   | 1                              | 93                 | 10.7     | 9.88                  | 7.39                          | 1                                   |
| P50454    | Serpin H1 OS=Homo sapiens OX=9606 GN=SERPINH1 PE=1 SV=2                                  | 31                        | 10                      | 29                  | 10                             | 418                | 46.4     | 8.69                  | 72.02                         | 10                                  |
| P51884    | Lumican OS=Homo sapiens OX=9606 GN=LUM PE=1 SV=2                                         | 29                        | 7                       | 42                  | 7                              | 338                | 38.4     | 6.61                  | 113.38                        | 7                                   |
| P55083    | Microfibril-associated glycoprotein 4 OS=Homo sapiens OX=9606 GN=MFAP4 PE=1 SV=2         | 15                        | 2                       | 3                   | 2                              | 255                | 28.6     | 5.63                  | 6.32                          | 2                                   |
| P55290    | Cadherin-13 OS=Homo sapiens OX=9606 GN=CDH13 PE=1 SV=1                                   | 2                         | 1                       | 3                   | 1                              | 713                | 78.2     | 4.98                  | 8.11                          | 1                                   |
| P62328    | Thymosin beta-4 OS=Homo sapiens OX=9606 GN=TMSB4X PE=1 SV=2                              | 27                        | 1                       | 1                   | 1                              | 44                 | 5.1      | 5.06                  | 2.21                          | 1                                   |
| P63261    | Actin, cytoplasmic 2 OS=Homo sapiens OX=9606 GN=ACTG1 PE=1 SV=1                          | 48                        | 10                      | 33                  | 1                              | 375                | 41.8     | 5.48                  | 82.22                         | 10                                  |
| P63313    | Thymosin beta-10 OS=Homo sapiens OX=9606 GN=TMSB10 PE=1 SV=2                             | 34                        | 1                       | 1                   | 1                              | 44                 | 5        | 5.36                  | 2.45                          | 1                                   |
| Q01995    | Transgelin OS=Homo sapiens OX=9606 GN=TAGLN PE=1 SV=4                                    | 20                        | 3                       | 5                   | 3                              | 201                | 22.6     | 8.84                  | 11.96                         | 3                                   |
| Q08629    | Testican-1 OS=Homo sapiens OX=9606 GN=SPOCK1 PE=1 SV=1                                   | 18                        | 6                       | 9                   | 6                              | 439                | 49.1     | 6.1                   | 19.97                         | 6                                   |
| Q0Z944    | Beta globin (Fragment) OS=Homo sapiens OX=9606 GN=HBB PE=3 SV=1                          | 10                        | 1                       | 3                   | 1                              | 105                | 11.5     | 6.37                  | 6.81                          | 1                                   |

| Accession | Description                                                                                                   | Coverage [%] <sup>a</sup> | # Peptides <sup>b</sup> | # PSMs <sup>c</sup> | # Unique Peptides <sup>d</sup> | # AAs <sup>e</sup> | MW [kDa] | Calc. pI <sup>f</sup> | Score Sequest HT <sup>g</sup> | # Peptides: Sequest HT <sup>h</sup> |
|-----------|---------------------------------------------------------------------------------------------------------------|---------------------------|-------------------------|---------------------|--------------------------------|--------------------|----------|-----------------------|-------------------------------|-------------------------------------|
| Q10471    | Polypeptide N-acetylgalactosaminyltransferase 2 OS=Homo sapiens OX=9606 GN=GALNT2 PE=1 SV=1                   | 4                         | 1                       | 1                   | 1                              | 571                | 64.7     | 8.35                  | 2.17                          | 1                                   |
| Q12841    | Follistatin-related protein 1 OS=Homo sapiens OX=9606 GN=FSTL1 PE=1 SV=1                                      | 40                        | 8                       | 35                  | 8                              | 308                | 35       | 5.52                  | 99.97                         | 8                                   |
| Q14767    | Latent-transforming growth factor beta-binding protein 2 OS=Homo sapiens OX=9606 GN=LTBP2 PE=1 SV=3           | 1                         | 1                       | 2                   | 1                              | 1821               | 194.9    | 5.19                  | 4.44                          | 1                                   |
| Q15582    | Transforming growth factor-beta-induced protein ig-h3 OS=Homo sapiens OX=9606 GN=TGFB1 PE=1 SV=1              | 46                        | 19                      | 88                  | 19                             | 683                | 74.6     | 7.71                  | 267.44                        | 19                                  |
| Q16270    | Insulin-like growth factor-binding protein 7 OS=Homo sapiens OX=9606 GN=IGFBP7 PE=1 SV=1                      | 33                        | 7                       | 28                  | 7                              | 282                | 29.1     | 7.9                   | 75.23                         | 7                                   |
| Q16778    | Histone H2B type 2-E OS=Homo sapiens OX=9606 GN=HIST2H2BE PE=1 SV=3                                           | 12                        | 1                       | 2                   | 1                              | 126                | 13.9     | 10.32                 | 5.54                          | 1                                   |
| Q53FA4    | Cysteine-rich, angiogenic inducer, 61 variant (Fragment) OS=Homo sapiens OX=9606 PE=2 SV=1                    | 12                        | 2                       | 2                   | 2                              | 381                | 42       | 8.31                  | 5.27                          | 2                                   |
| Q53G99    | Beta actin variant (Fragment) OS=Homo sapiens OX=9606 PE=2 SV=1                                               | 48                        | 10                      | 34                  | 1                              | 375                | 41.7     | 5.59                  | 84.73                         | 10                                  |
| Q59GA0    | Thy-1 cell surface antigen variant (Fragment) OS=Homo sapiens OX=9606 PE=2 SV=1                               | 10                        | 1                       | 1                   | 1                              | 145                | 15.9     | 9                     | 2.02                          | 1                                   |
| Q5M8T4    | Connective tissue growth factor OS=Homo sapiens OX=9606 GN=CTGF PE=2 SV=1                                     | 11                        | 3                       | 5                   | 3                              | 349                | 38       | 7.94                  | 10.18                         | 3                                   |
| Q6EMK4    | Vasorin OS=Homo sapiens OX=9606 GN=VASN PE=1 SV=1                                                             | 11                        | 4                       | 5                   | 4                              | 673                | 71.7     | 7.39                  | 12.17                         | 4                                   |
| Q6FHC9    | STC2 protein (Fragment) OS=Homo sapiens OX=9606 GN=STC2 PE=2 SV=1                                             | 13                        | 2                       | 6                   | 2                              | 302                | 33.2     | 7.3                   | 21.24                         | 2                                   |
| Q6FWH3    | DF protein OS=Homo sapiens OX=9606 GN=DF PE=2 SV=1                                                            | 24                        | 3                       | 6                   | 3                              | 228                | 24.4     | 7.24                  | 16.93                         | 3                                   |
| Q6IAW5    | CALU protein OS=Homo sapiens OX=9606 GN=CALU PE=2 SV=1                                                        | 25                        | 5                       | 8                   | 5                              | 315                | 37.1     | 4.64                  | 22.42                         | 5                                   |
| Q6YHK3    | CD109 antigen OS=Homo sapiens OX=9606 GN=CD109 PE=1 SV=2                                                      | 1                         | 1                       | 2                   | 1                              | 1445               | 161.6    | 5.85                  | 4.71                          | 1                                   |
| Q8IUX7    | Adipocyte enhancer-binding protein 1 OS=Homo sapiens OX=9606 GN=AEBP1 PE=1 SV=1                               | 10                        | 8                       | 13                  | 8                              | 1158               | 130.8    | 5.11                  | 32.22                         | 8                                   |
| Q8TB73    | Protein NDNF OS=Homo sapiens OX=9606 GN=NDNF PE=1 SV=2                                                        | 10                        | 4                       | 8                   | 4                              | 568                | 64.6     | 8.94                  | 17.18                         | 4                                   |
| Q99715    | Collagen alpha-1(XII) chain OS=Homo sapiens OX=9606 GN=COL12A1 PE=1 SV=2                                      | 7                         | 17                      | 27                  | 17                             | 3063               | 332.9    | 5.53                  | 65.31                         | 17                                  |
| Q99985    | Semaphorin-3C OS=Homo sapiens OX=9606 GN=SEMA3C PE=2 SV=2                                                     | 1                         | 1                       | 1                   | 1                              | 751                | 85.2     | 8.69                  | 2.15                          | 1                                   |
| Q9UHI8    | A disintegrin and metalloproteinase with thrombospondin motifs 1 OS=Homo sapiens OX=9606 GN=ADAMTS1 PE=1 SV=4 | 3                         | 1                       | 1                   | 1                              | 967                | 105.3    | 6.83                  | 2.92                          | 1                                   |
| V9HWC6    | Peptidyl-prolyl cis-trans isomerase OS=Homo sapiens OX=9606 GN=HEL-S-39 PE=2 SV=1                             | 28                        | 5                       | 12                  | 5                              | 208                | 22.7     | 9.32                  | 26.88                         | 5                                   |
| V9HWE8    | Epididymis secretory sperm binding protein Li 47e OS=Homo sapiens OX=9606 GN=HEL-S-47e PE=2 SV=1              | 7                         | 1                       | 1                   | 1                              | 204                | 23.2     | 5.11                  | 2.25                          | 1                                   |
| V9HWI5    | Cofilin 1 (Non-muscle), isoform CRA_b OS=Homo sapiens OX=9606 GN=HEL-S-15 PE=2 SV=1                           | 20                        | 2                       | 4                   | 2                              | 166                | 18.5     | 8.09                  | 8.95                          | 2                                   |
| V9HWK1    | Triosephosphate isomerase OS=Homo sapiens OX=9606 GN=HEL-S-49 PE=2 SV=1                                       | 12                        | 2                       | 3                   | 2                              | 249                | 26.7     | 6.9                   | 7.05                          | 2                                   |
| V9HWN7    | Fructose-bisphosphate aldolase OS=Homo sapiens OX=9606 GN=HEL-S-87p PE=2 SV=1                                 | 20                        | 5                       | 11                  | 5                              | 364                | 39.4     | 8.09                  | 28                            | 5                                   |
| X6RJP6    | Transgelin-2 (Fragment) OS=Homo sapiens OX=9606 GN=TAGLN2 PE=1 SV=1                                           | 14                        | 2                       | 4                   | 2                              | 187                | 21.1     | 7.81                  | 9.65                          | 2                                   |

<sup>a</sup> Coverage is the percentage of the sequence covered by identifications (PSMs only) from the included searches. <sup>b</sup> # Peptides is the number of distinct peptide sequences in the protein. <sup>c</sup> # PSMs is number of identified peptide spectrum matches identified from all included searches, including those redundantly identified. <sup>d</sup> # Unique peptide is the total number of distinct peptide sequences unique to the protein group. <sup>e</sup> #AAs is length of the protein sequence. <sup>f</sup> Calc pI (isoelectric point) number is theoretically calculated isoelectric point for the protein that is, the pH at which a particular molecule carries no net electrical charge. <sup>g</sup> Score Sequest HT is a protein score calculated by summing the individual scores for each peptide. The higher this score, the higher the individual

score of the peptide, allowing for better identification.<sup>h</sup> # Peptides: Sequest HT is the number of distinct peptide sequences in the identified protein.

Supplementary Table 1-6: Detailed information on commonly secreted proteins by 3 synovial membrane (SM) mesenchymal stem cells (MSCs) under inflammatory condition.

| Accession  | Description                                                                                                                                                | Coverage [%] <sup>a</sup> | # Peptides <sup>b</sup> | # PSMs <sup>c</sup> | # Unique Peptides <sup>d</sup> | # AAs <sup>e</sup> | MW [kDa] | Calc. pI <sup>f</sup> | Score Sequest HT <sup>g</sup> | # Peptides: Sequest HT <sup>h</sup> |
|------------|------------------------------------------------------------------------------------------------------------------------------------------------------------|---------------------------|-------------------------|---------------------|--------------------------------|--------------------|----------|-----------------------|-------------------------------|-------------------------------------|
| A0A024QYT5 | Serpin peptidase inhibitor, clade E (Nexin, plasminogen activator inhibitor type 1), member 1, isoform CRA_b OS=Homo sapiens OX=9606 GN=SERPINE1 PE=3 SV=1 | 22                        | 6                       | 10                  | 6                              | 402                | 45       | 7.2                   | 24.61                         | 6                                   |
| A0A024QZL1 | Proteoglycan 1, secretory granule, isoform CRA_a OS=Homo sapiens OX=9606 GN=PRG1 PE=4 SV=1                                                                 | 8                         | 1                       | 1                   | 1                              | 158                | 17.6     | 4.86                  | 2.06                          | 1                                   |
| A0A024R1U8 | Insulin-like growth factor binding protein 4, isoform CRA_a OS=Homo sapiens OX=9606 GN=IGFBP4 PE=4 SV=1                                                    | 25                        | 4                       | 10                  | 4                              | 258                | 27.9     | 7.15                  | 27.64                         | 4                                   |
| A0A024R222 | Phosphoserine aminotransferase OS=Homo sapiens OX=9606 GN=PSAT1 PE=3 SV=1                                                                                  | 4                         | 1                       | 3                   | 1                              | 370                | 40.4     | 7.66                  | 6.75                          | 1                                   |
| A0A024R462 | Fibronectin 1, isoform CRA_n OS=Homo sapiens OX=9606 GN=FN1 PE=4 SV=1                                                                                      | 33                        | 44                      | 146                 | 44                             | 2355               | 259      | 5.73                  | 424.23                        | 44                                  |
| A0A024R5Z7 | Annexin OS=Homo sapiens OX=9606 GN=ANXA2 PE=3 SV=1                                                                                                         | 23                        | 7                       | 16                  | 7                              | 339                | 38.6     | 7.75                  | 41                            | 7                                   |
| A0A024R6R4 | Matrix metalloproteinase 2 (Gelatinase A, 72kDa gelatinase, 72kDa type IV collagenase), isoform CRA_a OS=Homo sapiens OX=9606 GN=MMP2 PE=3 SV=1            | 23                        | 10                      | 21                  | 10                             | 660                | 73.8     | 5.47                  | 63.07                         | 10                                  |
| A0A024R8V7 | TIMP metalloproteinase inhibitor 2, isoform CRA_b OS=Homo sapiens OX=9606 GN=TIMP2 PE=4 SV=1                                                               | 26                        | 3                       | 5                   | 3                              | 179                | 20.2     | 7.17                  | 11.45                         | 3                                   |
| A0A024R969 | Chitinase 3-like 1 (Cartilage glycoprotein-39), isoform CRA_a OS=Homo sapiens OX=9606 GN=CHI3L1 PE=3 SV=1                                                  | 42                        | 13                      | 38                  | 13                             | 383                | 42.6     | 8.46                  | 114.96                        | 13                                  |
| A0A024RDA5 | Multifunctional fusion protein OS=Homo sapiens OX=9606 GN=IL8 PE=3 SV=1                                                                                    | 16                        | 1                       | 8                   | 1                              | 99                 | 11.1     | 8.84                  | 22.59                         | 1                                   |
| A0A087WTA8 | Collagen alpha-2(I) chain OS=Homo sapiens OX=9606 GN=COL1A2 PE=1 SV=1                                                                                      | 32                        | 25                      | 67                  | 25                             | 1364               | 129.1    | 9.01                  | 185.98                        | 25                                  |
| A0A087X0S5 | Collagen alpha-1(VI) chain OS=Homo sapiens OX=9606 GN=COL6A1 PE=1 SV=1                                                                                     | 14                        | 9                       | 22                  | 9                              | 1026               | 108.3    | 5.43                  | 56.05                         | 9                                   |
| A0A0A0MT01 | Gelsolin OS=Homo sapiens OX=9606 GN=GSN PE=1 SV=1                                                                                                          | 5                         | 2                       | 3                   | 2                              | 767                | 84.7     | 5.83                  | 8.25                          | 2                                   |
| A0A0B4U5E3 | Granulocyte-colony stimulating factor (Fragment) OS=Homo sapiens OX=9606 PE=2 SV=1                                                                         | 9                         | 1                       | 5                   | 1                              | 174                | 18.7     | 6.04                  | 17.05                         | 1                                   |
| A0A0H3W617 | Stanniocalcin 1 OS=Homo sapiens OX=9606 GN=stc1 PE=2 SV=1                                                                                                  | 25                        | 3                       | 8                   | 3                              | 178                | 20.5     | 8.72                  | 21.14                         | 3                                   |
| A0A0S2Z3G9 | Actinin alpha 4 isoform 1 (Fragment) OS=Homo sapiens OX=9606 GN=ACTN4 PE=2 SV=1                                                                            | 12                        | 9                       | 25                  | 3                              | 911                | 104.8    | 5.44                  | 59.72                         | 9                                   |
| A0A0S2Z4G6 | Tropomyosin 1 (Alpha), isoform CRA_o (Fragment) OS=Homo sapiens OX=9606 GN=TPM1 PE=1 SV=1                                                                  | 12                        | 5                       | 13                  | 3                              | 284                | 32.7     | 4.74                  | 31.18                         | 5                                   |
| A0A161I202 | Lactoferrin OS=Homo sapiens OX=9606 GN=LTF PE=2 SV=1                                                                                                       | 2                         | 1                       | 1                   | 1                              | 711                | 78.3     | 8.18                  | 2.51                          | 1                                   |
| A0A172Q381 | Endosialin (Fragment) OS=Homo sapiens OX=9606 GN=TEM1 PE=2 SV=1                                                                                            | 2                         | 1                       | 1                   | 1                              | 668                | 71.2     | 5.01                  | 2.16                          | 1                                   |
| A0A1B0GU92 | Uncharacterized protein OS=Homo sapiens OX=9606 PE=1 SV=1                                                                                                  | 4                         | 1                       | 1                   | 1                              | 557                | 59.8     | 6.62                  | 2.04                          | 1                                   |
| A0A1U9X7H4 | CFB OS=Homo sapiens OX=9606 PE=3 SV=1                                                                                                                      | 1                         | 1                       | 2                   | 1                              | 764                | 85.5     | 6.96                  | 4.22                          | 1                                   |
| A4D1W7     | Inhibin, beta A (Activin A, activin AB alpha polypeptide) OS=Homo sapiens OX=9606 GN=INHBA PE=2 SV=1                                                       | 11                        | 3                       | 4                   | 3                              | 426                | 47.4     | 8.03                  | 9.94                          | 3                                   |
| A4D2D2     | Procollagen C-endopeptidase enhancer OS=Homo sapiens OX=9606 GN=PCOLCE PE=4 SV=1                                                                           | 10                        | 3                       | 5                   | 3                              | 449                | 47.9     | 7.43                  | 12.96                         | 3                                   |
| A5GZ70     | Matrix metalloproteinase 3 (Fragment) OS=Homo sapiens OX=9606 GN=MMP3 PE=2 SV=1                                                                            | 42                        | 3                       | 13                  | 1                              | 71                 | 8.1      | 6.67                  | 31.82                         | 3                                   |
| A5PLM9     | Cathepsin L1 OS=Homo sapiens OX=9606 GN=CTSL1 PE=2 SV=1                                                                                                    | 4                         | 1                       | 3                   | 1                              | 333                | 37.5     | 5.45                  | 8.55                          | 1                                   |
| A6XND1     | Insulin-like growth factor binding protein 3 isoform b OS=Homo sapiens OX=9606 GN=IGFBP3 PE=1 SV=1                                                         | 30                        | 5                       | 8                   | 5                              | 263                | 29       | 8.46                  | 20.08                         | 5                                   |
| A8K7Q1     | cDNA FLJ77770, highly similar to Homo sapiens nucleobindin 1 (NUCB1), mRNA OS=Homo sapiens OX=9606 PE=2 SV=1                                               | 3                         | 1                       | 1                   | 1                              | 461                | 53.9     | 5.25                  | 1.92                          | 1                                   |

| Accession | Description                                                                                                                                                                     | Coverage [%] <sup>a</sup> | # Peptides <sup>b</sup> | # PSMs <sup>c</sup> | # Unique Peptides <sup>d</sup> | # AAs <sup>e</sup> | MW [kDa] | Calc. pI <sup>f</sup> | Score Sequest HT <sup>g</sup> | # Peptides: Sequest HT <sup>h</sup> |
|-----------|---------------------------------------------------------------------------------------------------------------------------------------------------------------------------------|---------------------------|-------------------------|---------------------|--------------------------------|--------------------|----------|-----------------------|-------------------------------|-------------------------------------|
| B2R4R0    | Histone H4 OS=Homo sapiens OX=9606 GN=HIST1H4H PE=2 SV=1                                                                                                                        | 41                        | 4                       | 13                  | 4                              | 103                | 11.4     | 11.36                 | 35.67                         | 4                                   |
| B2R5H0    | Protein S100 OS=Homo sapiens OX=9606 PE=2 SV=1                                                                                                                                  | 24                        | 2                       | 2                   | 2                              | 105                | 11.7     | 7.18                  | 3.94                          | 2                                   |
| B2R5J8    | C-C motif chemokine OS=Homo sapiens OX=9606 PE=2 SV=1                                                                                                                           | 12                        | 1                       | 2                   | 1                              | 91                 | 10       | 9.07                  | 3.95                          | 1                                   |
| B2RBS8    | cDNA, FLJ95666, highly similar to Homo sapiens albumin (ALB), mRNA OS=Homo sapiens OX=9606 PE=2 SV=1                                                                            | 2                         | 2                       | 9                   | 2                              | 609                | 69.3     | 6.28                  | 24.5                          | 2                                   |
| B2RCM5    | cDNA, FLJ96160, highly similar to Homo sapiens EGF-containing fibulin-like extracellular matrix protein 2 (EFEMP2), mRNA OS=Homo sapiens OX=9606 PE=2 SV=1                      | 3                         | 1                       | 1                   | 1                              | 443                | 49.3     | 4.94                  | 1.9                           | 1                                   |
| B2RDE1    | cDNA, FLJ96568, highly similar to Homo sapiens tropomyosin 3 (TPM3), mRNA OS=Homo sapiens OX=9606 PE=2 SV=1                                                                     | 15                        | 5                       | 10                  | 3                              | 248                | 29       | 4.75                  | 22.99                         | 5                                   |
| B2RDW0    | cDNA, FLJ96792, highly similar to Homo sapiens calmodulin 2 (phosphorylase kinase, delta) (CALM2), mRNA OS=Homo sapiens OX=9606 PE=2 SV=1                                       | 21                        | 2                       | 3                   | 2                              | 149                | 16.8     | 4.22                  | 7.48                          | 2                                   |
| B3KQT9    | Protein disulfide-isomerase OS=Homo sapiens OX=9606 PE=2 SV=1                                                                                                                   | 8                         | 2                       | 5                   | 2                              | 480                | 54.1     | 7.21                  | 18.56                         | 2                                   |
| B4DDQ2    | Biglycan OS=Homo sapiens OX=9606 PE=2 SV=1                                                                                                                                      | 18                        | 5                       | 16                  | 5                              | 334                | 37.6     | 7.97                  | 40.41                         | 5                                   |
| B4DLV7    | Rab GDP dissociation inhibitor OS=Homo sapiens OX=9606 PE=2 SV=1                                                                                                                | 10                        | 3                       | 4                   | 3                              | 449                | 51.1     | 8.18                  | 9.47                          | 3                                   |
| B4DM82    | Peptidyl-prolyl cis-trans isomerase OS=Homo sapiens OX=9606 PE=2 SV=1                                                                                                           | 34                        | 3                       | 8                   | 3                              | 129                | 14.1     | 8.47                  | 21.75                         | 3                                   |
| B4DMR3    | cDNA FLJ51896, highly similar to Glia-derived nexin OS=Homo sapiens OX=9606 PE=2 SV=1                                                                                           | 40                        | 12                      | 46                  | 12                             | 334                | 37.1     | 9.52                  | 121.2                         | 12                                  |
| B4DN59    | cDNA FLJ52702, highly similar to Homo sapiens CD44 antigen (homing function and Indian blood group system) (CD44), transcript variant 4, mRNA OS=Homo sapiens OX=9606 PE=2 SV=1 | 3                         | 1                       | 1                   | 1                              | 329                | 36       | 5.9                   | 2.16                          | 1                                   |
| B4DPQ0    | Complement C1r subcomponent OS=Homo sapiens OX=9606 GN=C1R PE=1 SV=1                                                                                                            | 4                         | 2                       | 3                   | 2                              | 719                | 81.8     | 6.37                  | 7.55                          | 2                                   |
| B4DPW5    | cDNA FLJ59374, highly similar to Homo sapiens caldesmon 1 (CALD1), transcript variant 2, mRNA OS=Homo sapiens OX=9606 PE=2 SV=1                                                 | 12                        | 4                       | 4                   | 4                              | 497                | 57.4     | 8.22                  | 8.27                          | 4                                   |
| B4DPZ5    | cDNA FLJ53495, highly similar to Polymerase I and transcript release factor OS=Homo sapiens OX=9606 PE=2 SV=1                                                                   | 8                         | 2                       | 4                   | 2                              | 363                | 40.5     | 5.25                  | 10.39                         | 2                                   |
| B4E324    | cDNA FLJ60397, highly similar to Lysosomal protective protein OS=Homo sapiens OX=9606 PE=2 SV=1                                                                                 | 3                         | 1                       | 2                   | 1                              | 480                | 54.2     | 6.98                  | 4.48                          | 1                                   |
| B4E3Q1    | cDNA FLJ61580, highly similar to Calsyntenin-1 OS=Homo sapiens OX=9606 PE=2 SV=1                                                                                                | 1                         | 1                       | 2                   | 1                              | 962                | 107.7    | 4.97                  | 4.4                           | 1                                   |
| B4E3S0    | Coronin OS=Homo sapiens OX=9606 GN=CORO1C PE=1 SV=1                                                                                                                             | 4                         | 1                       | 1                   | 1                              | 369                | 41.6     | 6.73                  | 2.25                          | 1                                   |
| B5MCZ3    | Interleukin-6 OS=Homo sapiens OX=9606 GN=IL6 PE=1 SV=1                                                                                                                          | 38                        | 6                       | 27                  | 6                              | 189                | 21.5     | 6.57                  | 72.57                         | 6                                   |
| C9JIZ6    | Prosaposin OS=Homo sapiens OX=9606 GN=PSAP PE=1 SV=2                                                                                                                            | 6                         | 2                       | 4                   | 2                              | 527                | 58.4     | 5.17                  | 10.47                         | 2                                   |
| D0PNI1    | Epididymis luminal protein 4 OS=Homo sapiens OX=9606 GN=YWHAZ PE=2 SV=1                                                                                                         | 17                        | 3                       | 9                   | 2                              | 245                | 27.7     | 4.79                  | 19                            | 3                                   |
| D3DTX7    | Collagen, type I, alpha 1, isoform CRA_a OS=Homo sapiens OX=9606 GN=COL1A1 PE=4 SV=1                                                                                            | 8                         | 5                       | 9                   | 5                              | 885                | 84.7     | 6.24                  | 21.26                         | 5                                   |
| D3YTG3    | Target of Nesh-SH3 OS=Homo sapiens OX=9606 GN=ABI3BP PE=1 SV=1                                                                                                                  | 3                         | 3                       | 6                   | 3                              | 1777               | 195.2    | 9.73                  | 15.57                         | 3                                   |
| D6RF92    | C-X-C motif chemokine OS=Homo sapiens OX=9606 GN=CXCL6 PE=1 SV=1                                                                                                                | 28                        | 3                       | 15                  | 2                              | 113                | 11.9     | 9.76                  | 34.57                         | 3                                   |
| D9ZGF2    | Collagen, type VI, alpha 3 OS=Homo sapiens OX=9606 GN=COL6A3 PE=4 SV=1                                                                                                          | 6                         | 15                      | 21                  | 15                             | 3177               | 343.5    | 6.68                  | 44.6                          | 15                                  |
| E5RGS7    | Uncharacterized protein OS=Homo sapiens OX=9606 PE=4 SV=1                                                                                                                       | 8                         | 1                       | 1                   | 1                              | 132                | 14.4     | 7.34                  | 2.04                          | 1                                   |
| E5RI99    | 60S ribosomal protein L30 (Fragment) OS=Homo sapiens OX=9606 GN=RPL30 PE=1 SV=1                                                                                                 | 11                        | 1                       | 1                   | 1                              | 114                | 12.6     | 9.55                  | 1.9                           | 1                                   |

| Accession | Description                                                                                          | Coverage [%] <sup>a</sup> | # Peptides <sup>b</sup> | # PSMs <sup>c</sup> | # Unique Peptides <sup>d</sup> | # AAs <sup>e</sup> | MW [kDa] | Calc. pI <sup>f</sup> | Score Sequest HT <sup>g</sup> | # Peptides: Sequest HT <sup>h</sup> |
|-----------|------------------------------------------------------------------------------------------------------|---------------------------|-------------------------|---------------------|--------------------------------|--------------------|----------|-----------------------|-------------------------------|-------------------------------------|
| E9PKE3    | Heat shock cognate 71 kDa protein OS=Homo sapiens OX=9606 GN=HSPA8 PE=1 SV=1                         | 14                        | 5                       | 13                  | 4                              | 627                | 68.8     | 5.52                  | 32.21                         | 5                                   |
| F6RFD5    | Destrin OS=Homo sapiens OX=9606 GN=DSTN PE=1 SV=1                                                    | 18                        | 2                       | 3                   | 2                              | 135                | 15.4     | 8.59                  | 6.73                          | 2                                   |
| F8W6I7    | Heterogeneous nuclear ribonucleoprotein A1 OS=Homo sapiens OX=9606 GN=HNRNPA1 PE=1 SV=2              | 8                         | 2                       | 3                   | 2                              | 307                | 33.1     | 9.13                  | 7.16                          | 2                                   |
| H0Y3T6    | 45 kDa calcium-binding protein (Fragment) OS=Homo sapiens OX=9606 GN=SDF4 PE=1 SV=1                  | 5                         | 1                       | 1                   | 1                              | 243                | 28.1     | 5.1                   | 2.03                          | 1                                   |
| I4AY87    | Macrophage migration inhibitory factor (Fragment) OS=Homo sapiens OX=9606 GN=MIF PE=1 SV=1           | 10                        | 1                       | 1                   | 1                              | 115                | 12.5     | 7.88                  | 3.24                          | 1                                   |
| M0QZH0    | Reticulocalbin-3 (Fragment) OS=Homo sapiens OX=9606 GN=RCN3 PE=1 SV=1                                | 17                        | 2                       | 2                   | 2                              | 169                | 19.8     | 4.98                  | 4.04                          | 2                                   |
| O00300    | Tumor necrosis factor receptor superfamily member 11B OS=Homo sapiens OX=9606 GN=TNFRSF11B PE=1 SV=3 | 7                         | 2                       | 5                   | 2                              | 401                | 46       | 8.29                  | 11.84                         | 2                                   |
| O00391    | Sulfhydryl oxidase 1 OS=Homo sapiens OX=9606 GN=QSOX1 PE=1 SV=3                                      | 11                        | 6                       | 7                   | 6                              | 747                | 82.5     | 8.92                  | 20.01                         | 6                                   |
| O14992    | HS24/P52 OS=Homo sapiens OX=9606 GN=HS24/p52 PE=2 SV=1                                               | 3                         | 1                       | 2                   | 1                              | 474                | 52.3     | 8.21                  | 4.09                          | 1                                   |
| P01024    | Complement C3 OS=Homo sapiens OX=9606 GN=C3 PE=1 SV=2                                                | 8                         | 9                       | 13                  | 9                              | 1663               | 187      | 6.4                   | 32.25                         | 9                                   |
| P01033    | Metalloproteinase inhibitor 1 OS=Homo sapiens OX=9606 GN=TIMP1 PE=1 SV=1                             | 54                        | 7                       | 38                  | 7                              | 207                | 23.2     | 8.1                   | 133.67                        | 7                                   |
| P01034    | Cystatin-C OS=Homo sapiens OX=9606 GN=CST3 PE=1 SV=1                                                 | 8                         | 1                       | 1                   | 1                              | 146                | 15.8     | 8.75                  | 2.15                          | 1                                   |
| P02461    | Collagen alpha-1(III) chain OS=Homo sapiens OX=9606 GN=COL3A1 PE=1 SV=4                              | 3                         | 3                       | 8                   | 3                              | 1466               | 138.5    | 6.61                  | 23.05                         | 3                                   |
| P02545    | Prelamin-A/C OS=Homo sapiens OX=9606 GN=LMNA PE=1 SV=1                                               | 13                        | 7                       | 13                  | 7                              | 664                | 74.1     | 7.02                  | 30.38                         | 7                                   |
| P04083    | Annexin A1 OS=Homo sapiens OX=9606 GN=ANXA1 PE=1 SV=2                                                | 12                        | 3                       | 3                   | 3                              | 346                | 38.7     | 7.02                  | 6.42                          | 3                                   |
| P04792    | Heat shock protein beta-1 OS=Homo sapiens OX=9606 GN=HSPB1 PE=1 SV=2                                 | 15                        | 1                       | 2                   | 1                              | 205                | 22.8     | 6.4                   | 5.49                          | 1                                   |
| P05387    | 60S acidic ribosomal protein P2 OS=Homo sapiens OX=9606 GN=RPLP2 PE=1 SV=1                           | 14                        | 1                       | 1                   | 1                              | 115                | 11.7     | 4.54                  | 2.41                          | 1                                   |
| P05388    | 60S acidic ribosomal protein P0 OS=Homo sapiens OX=9606 GN=RPLP0 PE=1 SV=1                           | 4                         | 1                       | 1                   | 1                              | 317                | 34.3     | 5.97                  | 1.99                          | 1                                   |
| P07585    | Decorin OS=Homo sapiens OX=9606 GN=DCN PE=1 SV=1                                                     | 27                        | 7                       | 17                  | 7                              | 359                | 39.7     | 8.54                  | 44.76                         | 7                                   |
| P07737    | Profilin-1 OS=Homo sapiens OX=9606 GN=PFN1 PE=1 SV=2                                                 | 40                        | 4                       | 12                  | 4                              | 140                | 15       | 8.27                  | 30.75                         | 4                                   |
| P07996    | Thrombospondin-1 OS=Homo sapiens OX=9606 GN=THBS1 PE=1 SV=2                                          | 5                         | 4                       | 5                   | 4                              | 1170               | 129.3    | 4.94                  | 10.86                         | 4                                   |
| P08254    | Stromelysin-1 OS=Homo sapiens OX=9606 GN=MMP3 PE=1 SV=2                                              | 29                        | 12                      | 83                  | 9                              | 477                | 53.9     | 6.16                  | 236.92                        | 12                                  |
| P08670    | Vimentin OS=Homo sapiens OX=9606 GN=VIM PE=1 SV=4                                                    | 45                        | 19                      | 75                  | 19                             | 466                | 53.6     | 5.12                  | 202.46                        | 19                                  |
| P09238    | Stromelysin-2 OS=Homo sapiens OX=9606 GN=MMP10 PE=1 SV=1                                             | 13                        | 6                       | 11                  | 4                              | 476                | 54.1     | 5.8                   | 26.27                         | 6                                   |
| P09341    | Growth-regulated alpha protein OS=Homo sapiens OX=9606 GN=CXCL1 PE=1 SV=1                            | 38                        | 4                       | 50                  | 3                              | 107                | 11.3     | 10.43                 | 145.53                        | 4                                   |
| P09382    | Galectin-1 OS=Homo sapiens OX=9606 GN=LGALS1 PE=1 SV=2                                               | 35                        | 3                       | 15                  | 3                              | 135                | 14.7     | 5.5                   | 43.06                         | 3                                   |
| P09486    | SPARC OS=Homo sapiens OX=9606 GN=SPARC PE=1 SV=1                                                     | 28                        | 7                       | 26                  | 7                              | 303                | 34.6     | 4.84                  | 69.65                         | 7                                   |
| P09871    | Complement C1s subcomponent OS=Homo sapiens OX=9606 GN=C1S PE=1 SV=1                                 | 6                         | 3                       | 6                   | 3                              | 688                | 76.6     | 4.96                  | 14.52                         | 3                                   |

| Accession | Description                                                                                                     | Coverage [%] <sup>a</sup> | # Peptides <sup>b</sup> | # PSMs <sup>c</sup> | # Unique Peptides <sup>d</sup> | # AAs <sup>e</sup> | MW [kDa] | Calc. pI <sup>f</sup> | Score Sequest HT <sup>g</sup> | # Peptides: Sequest HT <sup>h</sup> |
|-----------|-----------------------------------------------------------------------------------------------------------------|---------------------------|-------------------------|---------------------|--------------------------------|--------------------|----------|-----------------------|-------------------------------|-------------------------------------|
| P10599    | Thioredoxin OS=Homo sapiens OX=9606 GN=TXN PE=1 SV=3                                                            | 31                        | 3                       | 8                   | 3                              | 105                | 11.7     | 4.92                  | 20.45                         | 3                                   |
| P11047    | Laminin subunit gamma-1 OS=Homo sapiens OX=9606 GN=LAMC1 PE=1 SV=3                                              | 2                         | 2                       | 5                   | 2                              | 1609               | 177.5    | 5.12                  | 11.08                         | 2                                   |
| P12110    | Collagen alpha-2(VI) chain OS=Homo sapiens OX=9606 GN=COL6A2 PE=1 SV=4                                          | 7                         | 5                       | 8                   | 5                              | 1019               | 108.5    | 6.21                  | 21.22                         | 5                                   |
| P13500    | C-C motif chemokine 2 OS=Homo sapiens OX=9606 GN=CCL2 PE=1 SV=1                                                 | 11                        | 1                       | 5                   | 1                              | 99                 | 11       | 9.25                  | 12.44                         | 1                                   |
| P14543    | Nidogen-1 OS=Homo sapiens OX=9606 GN=NID1 PE=1 SV=3                                                             | 2                         | 2                       | 2                   | 2                              | 1247               | 136.3    | 5.29                  | 4.64                          | 2                                   |
| P15018    | Leukemia inhibitory factor OS=Homo sapiens OX=9606 GN=LIF PE=1 SV=1                                             | 10                        | 2                       | 2                   | 2                              | 202                | 22       | 9.35                  | 4.56                          | 2                                   |
| P18206    | Vinculin OS=Homo sapiens OX=9606 GN=VCL PE=1 SV=4                                                               | 7                         | 6                       | 11                  | 6                              | 1134               | 123.7    | 5.66                  | 24.42                         | 6                                   |
| P19875    | C-X-C motif chemokine 2 OS=Homo sapiens OX=9606 GN=CXCL2 PE=1 SV=1                                              | 37                        | 3                       | 24                  | 1                              | 107                | 11.4     | 10.55                 | 77.89                         | 3                                   |
| P19876    | C-X-C motif chemokine 3 OS=Homo sapiens OX=9606 GN=CXCL3 PE=1 SV=1                                              | 38                        | 3                       | 25                  | 1                              | 107                | 11.3     | 10.37                 | 81.71                         | 3                                   |
| P20809    | Interleukin-11 OS=Homo sapiens OX=9606 GN=IL11 PE=1 SV=1                                                        | 25                        | 3                       | 8                   | 1                              | 199                | 21.4     | 10.62                 | 20.16                         | 3                                   |
| P21333    | Filamin-A OS=Homo sapiens OX=9606 GN=FLNA PE=1 SV=4                                                             | 9                         | 13                      | 18                  | 13                             | 2647               | 280.6    | 6.06                  | 43.5                          | 13                                  |
| P24592    | Insulin-like growth factor-binding protein 6 OS=Homo sapiens OX=9606 GN=IGFBP6 PE=1 SV=1                        | 6                         | 1                       | 2                   | 1                              | 240                | 25.3     | 7.81                  | 6.95                          | 1                                   |
| P26022    | Pentraxin-related protein PTX3 OS=Homo sapiens OX=9606 GN=PTX3 PE=1 SV=3                                        | 20                        | 6                       | 17                  | 6                              | 381                | 41.9     | 5.01                  | 46.62                         | 6                                   |
| P26038    | Moesin OS=Homo sapiens OX=9606 GN=MSN PE=1 SV=3                                                                 | 12                        | 5                       | 8                   | 5                              | 577                | 67.8     | 6.4                   | 17.85                         | 5                                   |
| P26447    | Protein S100-A4 OS=Homo sapiens OX=9606 GN=S100A4 PE=1 SV=1                                                     | 11                        | 1                       | 1                   | 1                              | 101                | 11.7     | 6.11                  | 2.04                          | 1                                   |
| P30044    | Peroxisomal protein 5, mitochondrial OS=Homo sapiens OX=9606 GN=PRDX5 PE=1 SV=4                                 | 5                         | 1                       | 1                   | 1                              | 214                | 22.1     | 8.7                   | 2.21                          | 1                                   |
| P35442    | Thrombospondin-2 OS=Homo sapiens OX=9606 GN=THBS2 PE=1 SV=2                                                     | 3                         | 2                       | 2                   | 2                              | 1172               | 129.9    | 4.83                  | 4.49                          | 2                                   |
| P35555    | Fibrillin-1 OS=Homo sapiens OX=9606 GN=FBN1 PE=1 SV=3                                                           | 6                         | 11                      | 18                  | 11                             | 2871               | 312      | 4.93                  | 47.21                         | 11                                  |
| P48307    | Tissue factor pathway inhibitor 2 OS=Homo sapiens OX=9606 GN=TFPI2 PE=1 SV=1                                    | 17                        | 3                       | 4                   | 3                              | 235                | 26.9     | 8.53                  | 9.47                          | 3                                   |
| P50454    | Serpin H1 OS=Homo sapiens OX=9606 GN=SERPINH1 PE=1 SV=2                                                         | 14                        | 5                       | 10                  | 5                              | 418                | 46.4     | 8.69                  | 24.55                         | 5                                   |
| P51884    | Lumican OS=Homo sapiens OX=9606 GN=LUM PE=1 SV=2                                                                | 20                        | 4                       | 15                  | 4                              | 338                | 38.4     | 6.61                  | 46.15                         | 4                                   |
| P51991    | Heterogeneous nuclear ribonucleoprotein A3 OS=Homo sapiens OX=9606 GN=HNRNPA3 PE=1 SV=2                         | 6                         | 2                       | 3                   | 2                              | 378                | 39.6     | 9.01                  | 6.34                          | 2                                   |
| P62328    | Thymosin beta-4 OS=Homo sapiens OX=9606 GN=TMSB4X PE=1 SV=2                                                     | 34                        | 2                       | 4                   | 2                              | 44                 | 5.1      | 5.06                  | 9.8                           | 2                                   |
| P63267    | Actin, gamma-enteric smooth muscle OS=Homo sapiens OX=9606 GN=ACTG2 PE=1 SV=1                                   | 14                        | 4                       | 13                  | 1                              | 376                | 41.9     | 5.48                  | 34.07                         | 4                                   |
| P63313    | Thymosin beta-10 OS=Homo sapiens OX=9606 GN=TMSB10 PE=1 SV=2                                                    | 34                        | 1                       | 4                   | 1                              | 44                 | 5        | 5.36                  | 10.17                         | 1                                   |
| P84243    | Histone H3.3 OS=Homo sapiens OX=9606 GN=H3F3A PE=1 SV=2                                                         | 5                         | 1                       | 2                   | 1                              | 136                | 15.3     | 11.27                 | 3.9                           | 1                                   |
| P98066    | Tumor necrosis factor-inducible gene 6 protein OS=Homo sapiens OX=9606 GN=TNFAIP6 PE=1 SV=2                     | 9                         | 2                       | 2                   | 2                              | 277                | 31.2     | 6.79                  | 4.57                          | 2                                   |
| P98160    | Basement membrane-specific heparan sulfate proteoglycan core protein OS=Homo sapiens OX=9606 GN=HSPG2 PE=1 SV=4 | 0                         | 1                       | 1                   | 1                              | 4391               | 468.5    | 6.51                  | 2.16                          | 1                                   |

| Accession | Description                                                                                                                     | Coverage [%] <sup>a</sup> | # Peptides <sup>b</sup> | # PSMs <sup>c</sup> | # Unique Peptides <sup>d</sup> | # AAs <sup>e</sup> | MW [kDa] | Calc. pI <sup>f</sup> | Score Sequest HT <sup>g</sup> | # Peptides: Sequest HT <sup>h</sup> |
|-----------|---------------------------------------------------------------------------------------------------------------------------------|---------------------------|-------------------------|---------------------|--------------------------------|--------------------|----------|-----------------------|-------------------------------|-------------------------------------|
| Q12841    | Follistatin-related protein 1 OS=Homo sapiens OX=9606 GN=FSTL1 PE=1 SV=1                                                        | 26                        | 6                       | 17                  | 6                              | 308                | 35       | 5.52                  | 50.44                         | 6                                   |
| Q16270    | Insulin-like growth factor-binding protein 7 OS=Homo sapiens OX=9606 GN=IGFBP7 PE=1 SV=1                                        | 33                        | 6                       | 17                  | 6                              | 282                | 29.1     | 7.9                   | 48.49                         | 6                                   |
| Q16777    | Histone H2A type 2-C OS=Homo sapiens OX=9606 GN=HIST2H2AC PE=1 SV=4                                                             | 22                        | 2                       | 7                   | 2                              | 129                | 14       | 10.9                  | 21.95                         | 2                                   |
| Q16778    | Histone H2B type 2-E OS=Homo sapiens OX=9606 GN=HIST2H2BE PE=1 SV=3                                                             | 12                        | 1                       | 3                   | 1                              | 126                | 13.9     | 10.32                 | 9.88                          | 1                                   |
| Q53FR6    | Cartilage oligomeric matrix protein variant (Fragment) OS=Homo sapiens OX=9606 PE=2 SV=1                                        | 9                         | 4                       | 8                   | 4                              | 757                | 82.7     | 4.61                  | 20.47                         | 4                                   |
| Q53G71    | Calreticulin variant (Fragment) OS=Homo sapiens OX=9606 PE=2 SV=1                                                               | 6                         | 1                       | 2                   | 1                              | 406                | 46.9     | 4.45                  | 6.38                          | 1                                   |
| Q53G75    | Matrix metalloproteinase 1 preproprotein variant (Fragment) OS=Homo sapiens OX=9606 PE=2 SV=1                                   | 29                        | 10                      | 30                  | 10                             | 405                | 46.5     | 7.03                  | 75.1                          | 10                                  |
| Q53G99    | Beta actin variant (Fragment) OS=Homo sapiens OX=9606 PE=2 SV=1                                                                 | 42                        | 10                      | 35                  | 1                              | 375                | 41.7     | 5.59                  | 100.89                        | 10                                  |
| Q53GY0    | Plastin 3 variant (Fragment) OS=Homo sapiens OX=9606 PE=2 SV=1                                                                  | 1                         | 1                       | 1                   | 1                              | 630                | 70.7     | 5.68                  | 2.16                          | 1                                   |
| Q53HQ7    | Elongation factor 1-alpha (Fragment) OS=Homo sapiens OX=9606 PE=2 SV=1                                                          | 21                        | 6                       | 13                  | 6                              | 462                | 50.2     | 8.94                  | 37.39                         | 6                                   |
| Q5UGI6    | Serine/cysteine proteinase inhibitor clade G member 1 splice variant 2 (Fragment) OS=Homo sapiens OX=9606 GN=SERPING1 PE=2 SV=1 | 11                        | 3                       | 5                   | 3                              | 333                | 37.3     | 8                     | 12.15                         | 3                                   |
| Q6EMK4    | Vasorin OS=Homo sapiens OX=9606 GN=VASN PE=1 SV=1                                                                               | 4                         | 2                       | 2                   | 2                              | 673                | 71.7     | 7.39                  | 5.16                          | 2                                   |
| Q6FHZ0    | Malate dehydrogenase OS=Homo sapiens OX=9606 GN=MDH2 PE=2 SV=1                                                                  | 4                         | 1                       | 2                   | 1                              | 338                | 35.5     | 8.68                  | 5.17                          | 1                                   |
| Q6IAW5    | CALU protein OS=Homo sapiens OX=9606 GN=CALU PE=2 SV=1                                                                          | 25                        | 5                       | 8                   | 5                              | 315                | 37.1     | 4.64                  | 21.1                          | 5                                   |
| Q75MU2    | Uncharacterized protein WBSCR1 (Fragment) OS=Homo sapiens OX=9606 GN=WBSCR1 PE=4 SV=1                                           | 8                         | 1                       | 2                   | 1                              | 156                | 17.1     | 5.31                  | 4.53                          | 1                                   |
| Q86Z22    | Epididymis secretory protein Li 297 OS=Homo sapiens OX=9606 GN=HEL-S-297 PE=2 SV=1                                              | 7                         | 1                       | 5                   | 1                              | 226                | 23.8     | 9.06                  | 14.6                          | 1                                   |
| Q8IUX7    | Adipocyte enhancer-binding protein 1 OS=Homo sapiens OX=9606 GN=AEBP1 PE=1 SV=1                                                 | 1                         | 1                       | 1                   | 1                              | 1158               | 130.8    | 5.11                  | 2.08                          | 1                                   |
| Q96AY3    | Peptidyl-prolyl cis-trans isomerase FKBP10 OS=Homo sapiens OX=9606 GN=FKBP10 PE=1 SV=1                                          | 4                         | 2                       | 2                   | 2                              | 582                | 64.2     | 5.62                  | 4.23                          | 2                                   |
| Q99715    | Collagen alpha-1(XII) chain OS=Homo sapiens OX=9606 GN=COL12A1 PE=1 SV=2                                                        | 1                         | 2                       | 5                   | 2                              | 3063               | 332.9    | 5.53                  | 11.09                         | 2                                   |
| Q9H4F8    | SPARC-related modular calcium-binding protein 1 OS=Homo sapiens OX=9606 GN=SMOC1 PE=1 SV=1                                      | 3                         | 1                       | 3                   | 1                              | 434                | 48.1     | 8.22                  | 7.66                          | 1                                   |
| S4R3N1    | HSPE1-MOB4 readthrough OS=Homo sapiens OX=9606 GN=HSPE1-MOB4 PE=3 SV=1                                                          | 5                         | 1                       | 2                   | 1                              | 261                | 29.7     | 6.16                  | 4.33                          | 1                                   |
| V9HWB4    | Epididymis secretory sperm binding protein Li 89n OS=Homo sapiens OX=9606 GN=HEL-S-89n PE=2 SV=1                                | 16                        | 7                       | 15                  | 6                              | 654                | 72.3     | 5.16                  | 41.96                         | 7                                   |
| V9HWC6    | Peptidyl-prolyl cis-trans isomerase OS=Homo sapiens OX=9606 GN=HEL-S-39 PE=2 SV=1                                               | 23                        | 4                       | 4                   | 4                              | 208                | 22.7     | 9.32                  | 9.47                          | 4                                   |
| V9HWI5    | Cofilin 1 (Non-muscle), isoform CRA_b OS=Homo sapiens OX=9606 GN=HEL-S-15 PE=2 SV=1                                             | 33                        | 3                       | 7                   | 3                              | 166                | 18.5     | 8.09                  | 18.78                         | 3                                   |
| V9HWK1    | Triosephosphate isomerase OS=Homo sapiens OX=9606 GN=HEL-S-49 PE=2 SV=1                                                         | 45                        | 6                       | 12                  | 6                              | 249                | 26.7     | 6.9                   | 32.09                         | 6                                   |
| V9HWN7    | Fructose-bisphosphate aldolase OS=Homo sapiens OX=9606 GN=HEL-S-87p PE=2 SV=1                                                   | 20                        | 5                       | 11                  | 5                              | 364                | 39.4     | 8.09                  | 31.33                         | 5                                   |
| V9HWP2    | Epididymis luminal protein 35 OS=Homo sapiens OX=9606 GN=HEL-S-125m PE=2 SV=1                                                   | 6                         | 4                       | 6                   | 4                              | 803                | 92.4     | 4.84                  | 13.86                         | 4                                   |

<sup>a</sup> Coverage is the percentage of the sequence covered by identifications (PSMs only) from the included searches. <sup>b</sup> # Peptides is the number of distinct peptide sequences in the protein. <sup>c</sup> # PSMs is number of identified peptide spectrum matches identified from



all included searches, including those redundantly identified. <sup>d</sup> # Unique peptide is the total number of distinct peptide sequences unique to the protein group. <sup>e</sup> #AAs is length of the protein sequence. <sup>f</sup> Calc pI (isoelectric point) number is theoretically calculated isoelectric point for the protein that is, the pH at which a particular molecule carries no net electrical charge. <sup>g</sup> Score Sequest HT is a protein score calculated by summing the individual scores for each peptide. The higher this score, the higher the individual score of the peptide, allowing for better identification. <sup>h</sup> # Peptides: Sequest HT is the number of distinct peptide sequences in the identified protein.
